# Supplementary material for: Acyl fluorides as direct precursors to fluoride ketyl radicals: reductive deuteration using SmI2 and D2O
Source: Royal Society of Chemistry journal article supplement (doi:10.1039/d1cc01381e), 2021-01-01
Supplement: d1cc01381e1.pdf [file d1cc01381e1.pdf]

## Acyl Fluorides as Direct Precursors to Fluoride Ketyl Radicals: Reductive Deuteration using SmI<sub>2</sub> and D<sub>2</sub>O

Hengzhao Li,<sup>§</sup> Mengqi Peng,<sup>§</sup> Zemin Lai,<sup>§</sup> Lei Ning,<sup>§</sup> Xingyue Chen,<sup>§</sup> Xiaoxu Zhang,<sup>†</sup> Pengjie Wang,<sup>†</sup> Roman Szostak,<sup>§</sup> Michal Szostak<sup>\*,‡</sup> and Jie An<sup>\*,†</sup>

<sup>†</sup>Department of Nutrition and Health, China Agricultural University, Beijing 100193, China

<sup>‡</sup>Department of Chemistry, Rutgers University, 73 Warren Street, Newark, New Jersey 07102, United States

<sup>§</sup>Department of Chemistry and Innovation Center of Pesticide Research, China Agricultural University, Beijing 100193, China

<sup>§</sup>Department of Chemistry, Wroclaw University, F. Joliot-Curie 14, Wroclaw 50-383, Poland

### Supplementary Information

#### Table of Contents

|                                                                                                            |              |
|------------------------------------------------------------------------------------------------------------|--------------|
| <b>1. Table of Contents</b>                                                                                | <b>SI-1</b>  |
| <b>2. General Information</b>                                                                              | <b>SI-2</b>  |
| <b>3. Experimental Procedures and Characterization Data</b>                                                | <b>SI-2</b>  |
| 3.1 Optimization Studies                                                                                   | SI-2         |
| 3.2 General Procedure for the Reductive Deuteration of Acyl Fluoride by SmI <sub>2</sub> -D <sub>2</sub> O | SI-2         |
| 3.3 Reductive Deuteration of Acyl Fluoride by SmI <sub>2</sub> -D <sub>2</sub> O                           | SI-3         |
| 3.4 Synthesis of (±) Cinacalcet- <i>d</i> <sub>2</sub> and 2,4-D 2-Ethylhexyl ester- <i>d</i> <sub>2</sub> | SI-9         |
| 3.5 Competition Experiments between <b>1a</b> and representative carbonyl compounds                        | SI-11        |
| 3.6 General Procedure for the Synthesis of Acyl Fluorides                                                  | SI-11        |
| <b>4. The Synthesis of Acyl Fluorides</b>                                                                  | <b>SI-12</b> |
| <b>5. Computational Details</b>                                                                            | <b>SI-18</b> |
| <b>6. References</b>                                                                                       | <b>SI-25</b> |
| <b>7. <sup>1</sup>H and <sup>13</sup>C{<sup>1</sup>H} NMR Spectra of Products</b>                          | <b>SI-26</b> |
| <b>8. <sup>1</sup>H and <sup>13</sup>C{<sup>1</sup>H} NMR Spectra of Substrates</b>                        | <b>SI-50</b> |
| <b>9. Cartesian Coordinates with Zero-Point Energies and Thermal Corrections</b>                           | <b>SI-71</b> |

## 2. General Information

Glassware was dried in an oven overnight before use. Thin layer chromatography was carried out on SIL G/UV254 silica-glass plates and plates were visualized using ultra-violet light (254 nm) and KMnO<sub>4</sub> solution. For flash column chromatography, silica gel 60, 35-70 μm was used. NMR data was collected at 300 MHz, 400 MHz or 500 MHz. Data was manipulated directly from the spectrometer or via a networked PC with appropriate software. All samples were analyzed in CDCl<sub>3</sub> unless otherwise stated. Reference values for residual solvent were taken as δ = 7.27 (CDCl<sub>3</sub>) for <sup>1</sup>H NMR; δ = 77.1 (CDCl<sub>3</sub>) for <sup>13</sup>C{<sup>1</sup>H} NMR. Multiplicities for coupled signals were designated using the following abbreviations: s = singlet, d = doublet, t = triplet, q = quartet, quin = quintet, br = broad signal, and are given in Hz.

All solvents and reagents were used as supplied. Samarium (II) iodide (0.100 M in THF) was prepared by standard methods.<sup>1</sup> The deuterium incorporations of D<sub>2</sub>O used in this study was 99.9%. Acyl fluorides were prepared by known methods.<sup>2</sup>

Determination of deuterium incorporation by <sup>1</sup>HNMR according to the equation below:

$$\text{Deuterium Incorporation} = 100\% - \left( \frac{\text{area}_{\text{R-CH}_2\text{-OH}}}{2} \right)$$

area<sub>R-CH<sub>2</sub>-OH</sub> means the integration of the R-CH<sub>2</sub>-OH peak.

## 3. Experimental Procedures and Characterization Data

### 3.1 Optimization Studies (Table 1)

To a solution of samarium (II) iodide (0.100 M in THF; 9.00 - 15.0 mL, 0.900 - 1.50 mmol, 3.00 - 5.00 equiv), was added deuterium oxide (3.00 - 15.0 mmol, 10.0 - 50.0 equiv). A solution of acyl fluoride (0.300 mmol, 1.00 equiv) in THF (1.00 mL) was then added under Ar at room temperature and stirred vigorously. After 0.500 - 30.0 min, excess SmI<sub>2</sub> was oxidized by bubbling air through the reaction mixture. The reaction mixture was diluted with EtOAc (10.0 mL) and HCl (5.00 mL, 1.00 M, aq). The aqueous layer was extracted with EtOAc (3 × 10.0 mL), organic layers were combined, washed with Na<sub>2</sub>S<sub>2</sub>O<sub>3</sub> (2 × 5.00 mL, sat., aq), dried over Na<sub>2</sub>SO<sub>4</sub>, filtered and concentrated. Then the sample was analyzed by <sup>1</sup>H NMR (CDCl<sub>3</sub>, 500 MHz) to obtain the deuterium incorporation and yield using internal standard (1,1,2,2 - tetrachlorethan) and comparison with corresponding samples.

### 3.2 General Procedure for the Reductive Deuteration of Acyl fluorides by SmI<sub>2</sub>-D<sub>2</sub>O

To a solution of samarium (II) iodide (0.100 M in THF; 15.0 mL, 1.50 mmol, 5.00 equiv), was added deuterium oxide (180 mg, 9.00 mmol, 30.0 equiv). A characteristic burgundy red color of SmI<sub>2</sub>-D<sub>2</sub>O complex was observed. A solution of acyl fluoride (0.300 mmol, 1.00 equiv) in THF (1.00 mL) was then added under Ar at room temperature and stirred vigorously. After 30.0

min, excess  $\text{SmI}_2$  was oxidized by bubbling air through the reaction mixture. The reaction mixture was diluted with EtOAc (10.0 mL) and HCl (5.00 mL, 1.00 M, aq). The aqueous layer was extracted with EtOAc ( $3 \times 10.0$  mL), organic layers were combined, washed with  $\text{Na}_2\text{S}_2\text{O}_3$  ( $2 \times 5.00$  mL, sat., aq), dried over  $\text{Na}_2\text{SO}_4$ , filtered and concentrated. The crude product was purified by flash chromatography (silica, 0 - 25% EtOAc/Hexane). The sample was analyzed by  $^1\text{H}$  NMR ( $\text{CDCl}_3$ , 500 MHz) to obtain the deuterium incorporation.

### 3.3 Reductive Deuteration of Acyl fluorides by $\text{SmI}_2\text{-D}_2\text{O}$ (Scheme 1)

#### 3-Phenylpropan-1,1- $d_2$ -1-ol<sup>3</sup> (**2a**, Scheme 1)

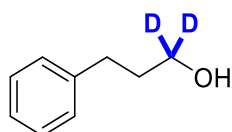

To a solution of samarium (II) iodide (0.100 M in THF; 50.0 mL, 5.00 mmol, 5.00 equiv), was added deuterium oxide (601 mg, 30.0 mmol, 30.0 equiv). A characteristic burgundy red color of  $\text{SmI}_2\text{-D}_2\text{O}$  complex was observed. A solution of 3-phenylpropanoyl fluoride (152 mg, 1.00 mmol, 1.00 equiv), in THF (3.00 mL) was then added under Ar at room temperature and stirred vigorously. After 60.0 min, excess  $\text{SmI}_2$  was oxidized by bubbling air through the reaction mixture. The reaction mixture was diluted with EtOAc (30.0 mL) and HCl (15.0 mL, 1.00 M, aq). The aqueous layer was extracted with EtOAc ( $3 \times 30.0$  mL), organic layers were combined, washed with  $\text{Na}_2\text{S}_2\text{O}_3$  ( $2 \times 15.0$  mL, sat., aq), dried over  $\text{Na}_2\text{SO}_4$ , filtered and concentrated. The crude product was purified by flash chromatography (silica, 9 - 20% EtOAc/Hexane), afforded 131 mg of **2a** in 95% yield as a colorless oil.  $\text{D}_2$  incorporation > 98%.  $^1\text{H}$  NMR (500 MHz,  $\text{CDCl}_3$ )  $\delta$  7.33 – 7.24 (m, 2H), 7.21 – 7.16 (m, 3H), 2.71 (t,  $J = 7.7$  Hz, 2H), 1.88 (t,  $J = 7.7$  Hz, 2H), 1.43 (br, 1H);  $^{13}\text{C}\{^1\text{H}\}$  NMR (126 MHz,  $\text{CDCl}_3$ )  $\delta$  141.9, 128.5 ( $\times 2$ ), 125.9, 61.6 (m), 34.1, 32.1.

#### 3-(4-Methoxyphenyl)propan-1,1- $d_2$ -1-ol<sup>3</sup> (**2b**, Scheme 1)

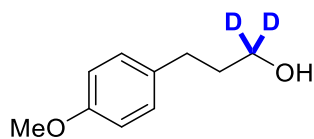

According to the general procedure, the reaction of 3-(4-methoxyphenyl)propanoyl fluoride (54.7 mg, 0.300 mmol), samarium (II) iodide (15.0 mL, 1.50 mmol), and deuterium oxide (180 mg, 9.00 mmol), after chromatography (9 - 20% EtOAc/Hexane), afforded 49.5 mg of **2b** in 98% yield as a colorless oil.  $\text{D}_2$  incorporation > 98%.  $^1\text{H}$  NMR (500 MHz,  $\text{CDCl}_3$ )  $\delta$  7.11 (m, 2H), 6.83 (m, 2H), 3.78 (s, 3H), 2.64 (t,  $J = 7.7$  Hz, 2H), 1.84 (t,  $J = 7.7$  Hz, 2H), 1.70 (br, 1H);  $^{13}\text{C}\{^1\text{H}\}$  NMR (126 MHz,  $\text{CDCl}_3$ )  $\delta$  157.8, 133.9, 129.4, 113.9, 61.5 (m), 55.3, 34.3, 31.1.

### 3-(*p*-Tolyl)propan-1,1-*d*<sub>2</sub>-1-ol<sup>3</sup> (**2c**, Scheme 1)

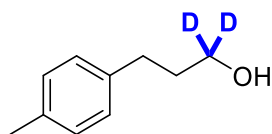

According to the general procedure, the reaction of 3-(*p*-tolyl)propanoyl fluoride (49.9 mg, 0.300 mmol), samarium (II) iodide (15.0 mL, 1.50 mmol), and deuterium oxide (180 mg, 9.00 mmol), after chromatography (9 - 20% EtOAc/ Hexane), afforded 44.8 mg of **2c** in 98% yield as a colorless oil. D<sub>2</sub> incorporation = 98%. <sup>1</sup>H NMR (500MHz, CDCl<sub>3</sub>) δ 7.11 – 7.07 (m, 4H), 2.66 (t, *J* = 7.8 Hz, 2H), 2.31 (s, 3H), 1.85 (t, *J* = 7.8 Hz, 2H), 1.65 (br, 1H); <sup>13</sup>C{<sup>1</sup>H} NMR (126 MHz, CDCl<sub>3</sub>) δ 138.8, 135.4, 129.1, 128.4, 61.6 (m), 34.2, 31.6, 21.0.

### 3-(4-Fluorophenyl)propan-1,1-*d*<sub>2</sub>-1-ol<sup>3</sup> (**2d**, Scheme 1)

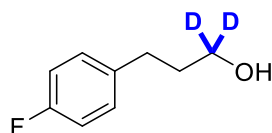

According to the general procedure, the reaction of 3-(4-fluorophenyl)propanoyl fluoride (51.1 mg, 0.300 mmol), samarium (II) iodide (15.0 mL, 1.50 mmol), and deuterium oxide (180 mg, 9.00 mmol), after chromatography (9 - 20% EtOAc/ Hexane), afforded 45.9 mg of **2d** in 98% yield as a colorless oil. D<sub>2</sub> incorporation = 98%. <sup>1</sup>H NMR (500 MHz, CDCl<sub>3</sub>) δ 7.14 (m, 2H), 6.96 (m, 2H), 2.68 (t, *J* = 7.8 Hz, 2H), 1.85 (t, *J* = 7.8 Hz, 2H), 1.51 (br, 1H); <sup>13</sup>C{<sup>1</sup>H} NMR (126 MHz, CDCl<sub>3</sub>) δ 161.3 (d, *J*<sub>C-F</sub> = 243.5 Hz), 137.5 (d, *J*<sub>C-F</sub> = 2.9 Hz), 129.8 (d, *J*<sub>C-F</sub> = 7.5 Hz), 115.2 (d, *J*<sub>C-F</sub> = 21.1 Hz), 61.4 (m), 34.2, 31.2.

### 3-(4-Chlorophenyl)propan-1,1-*d*<sub>2</sub>-1-ol<sup>3</sup> (**2e**, Scheme 1)

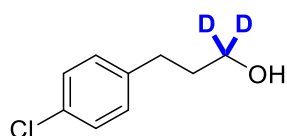

According to the general procedure, the reaction of 3-(4-chlorophenyl)propanoyl fluoride (56.0 mg, 0.300 mmol), samarium (II) iodide (15.0 mL, 1.50 mmol), and deuterium oxide (180 mg, 9.00 mmol), after chromatography (9 - 20% EtOAc/ Hexane), afforded 50.2 mg of **2e** in 97% yield as a colorless oil. D<sub>2</sub> incorporation = 98%. <sup>1</sup>H NMR (500 MHz, CDCl<sub>3</sub>) δ 7.24 (m, 2H), 7.12 (m, 2H), 2.67 (t, *J* = 7.7 Hz, 2H), 1.84 (t, *J* = 7.7 Hz, 2H), 1.62 (br, 1H); <sup>13</sup>C{<sup>1</sup>H} NMR (126 MHz, CDCl<sub>3</sub>) δ 140.3, 131.6, 129.8, 128.5, 61.3 (m), 33.9, 31.4.

### 3-(4-Bromophenyl)propan-1,1-*d*<sub>2</sub>-1-ol<sup>3</sup> (**2f**, Scheme 1)

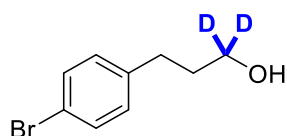

According to the general procedure, the reaction of 3-(4-bromophenyl)propanoyl fluoride (69.3 mg, 0.300 mmol), samarium (II) iodide (15.0 mL, 1.50 mmol), and deuterium oxide (180 mg,

9.00 mmol), after chromatography (9 - 20% EtOAc/ Hexane), afforded 62.5 mg of **2f** in 96% yield as a colorless oil. D<sub>2</sub> incorporation = 98%. <sup>1</sup>H NMR (500 MHz, CDCl<sub>3</sub>) δ 7.39 (m, 2H), 7.07 (m, 2H), 2.65 (t, *J* = 7.7 Hz, 2H), 1.84 (t, *J* = 7.7 Hz, 2H), 1.67 (br, 1H); <sup>13</sup>C{<sup>1</sup>H} NMR (126 MHz, CDCl<sub>3</sub>) δ 140.8, 131.5, 130.3, 119.6, 61.3 (m), 33.8, 31.4.

### 3-(4-Iodophenyl)propan-1,1-*d*<sub>2</sub>-1-ol<sup>4</sup> (**2g**, Scheme 1)

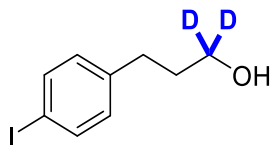

According to the general procedure, the reaction of 3-(4-iodophenyl)propanoyl fluoride (83.4mg, 0.300 mmol), samarium (II) iodide (15.0 mL, 1.50 mmol), and deuterium oxide (180 mg, 9.00 mmol), after chromatography (9 - 25% EtOAc/ Hexane), afforded 80.1 mg of **2g** in 96% yield as a colorless oil. D<sub>2</sub> incorporation = 98%. <sup>1</sup>H NMR (500 MHz, CDCl<sub>3</sub>) δ 7.59 (m, 2H), 6.95 (m, 2H), 2.65 (t, *J* = 7.7 Hz, 2H), 1.84 (t, *J* = 7.7 Hz, 2H), 1.62 (br, 1H); <sup>13</sup>C{<sup>1</sup>H} NMR (126 MHz, CDCl<sub>3</sub>) δ 141.5, 137.5, 130.6, 90.9, 61.5 (m), 33.8, 31.6.

### 3-(4-(Methylthio)phenyl)propan-1,1-*d*<sub>2</sub>-1-ol<sup>3</sup> (**2h**, Scheme 1)

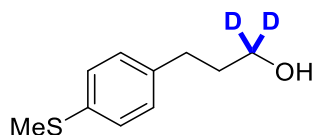

According to the general procedure, the reaction of 3-(4-(methylthio)phenyl)propanoyl fluoride (59.5 mg, 0.300 mmol), samarium (II) iodide (15.0 mL, 1.50 mmol), and deuterium oxide (180 mg, 9.00 mmol), after chromatography (9 - 20% EtOAc/ Hexane), afforded 54.2 mg of **2h** in 98% yield as a colorless oil. D<sub>2</sub> incorporation = 98%. <sup>1</sup>H NMR (500 MHz, CDCl<sub>3</sub>) δ 7.20 (m, 2H), 7.12 (m, 2H), 2.66 (t, *J* = 7.7 Hz, 2H), 2.46 (s, 3H), 1.84 (t, *J* = 7.7 Hz, 2H), 1.67 (br, 1H); <sup>13</sup>C{<sup>1</sup>H} NMR (126 MHz, CDCl<sub>3</sub>) δ 139.0, 135.4, 129.0, 127.2, 61.4 (m), 34.0, 31.5, 16.4.

### 2-(4-(*Tert*-butyl)phenyl)ethan-1,1-*d*<sub>2</sub>-1-ol<sup>5</sup> (**2i**, Scheme 1)

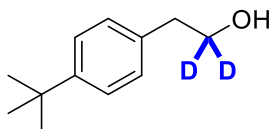

According to the general procedure, the reaction of 2-(4-(*tert*-butyl)phenyl)acetyl fluoride (58.3 mg, 0.300 mmol), samarium (II) iodide (15.0 mL, 1.50 mmol), and deuterium oxide (180 mg, 9.00 mmol), after chromatography (9 - 20% EtOAc/ Hexane), afforded 37.9 mg of **2i** in 70% yield as a colorless oil. D<sub>2</sub> incorporation > 98%. <sup>1</sup>H NMR (500 MHz, CDCl<sub>3</sub>) δ 7.33 (m, 2H), 7.15 (m, 2H), 2.80 (s, 2H), 1.86 (br, 1H), 1.30 (s, 9H); <sup>13</sup>C{<sup>1</sup>H} NMR (126 MHz, CDCl<sub>3</sub>) δ 149.3, 135.4, 128.7, 125.5, 62.9 (m), 38.5, 34.4, 31.4.

### (4-Methoxyphenyl)methan-*d*<sub>2</sub>-ol<sup>3</sup> (**2j**, Scheme 1)

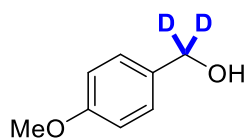

According to the general procedure, the reaction of 4-methoxybenzoyl fluoride (46.2 mg, 0.300 mmol), samarium (II) iodide (15.0 mL, 1.50 mmol), and deuterium oxide (180 mg, 9.00 mmol), after chromatography (9 - 17% EtOAc/ Hexane), afforded 41.2 mg of **2j** in 98% yield as a colorless oil. D<sub>2</sub> incorporation > 98%. <sup>1</sup>H NMR (500 MHz, CDCl<sub>3</sub>) δ 7.27 (m, 2H), 6.89 (m, 2H), 3.80 (s, 3H), 1.84 (br, 1H); <sup>13</sup>C {<sup>1</sup>H} NMR (126 MHz, CDCl<sub>3</sub>) δ 159.3, 133.1, 128.7, 114.0, 64.4 (m), 55.4.

### (4-(Methylthio)phenyl)methan-*d*<sub>2</sub>-ol<sup>6</sup> (**2k**, Scheme 1)

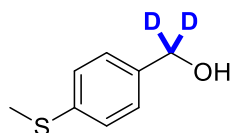

According to the general procedure, the reaction of 4-(methylthio)benzoyl fluoride (51.1 mg, 0.300 mmol), samarium (II) iodide (15.0 mL, 1.50 mmol), and deuterium oxide (180 mg, 9.00 mmol), after chromatography (9 - 25% EtOAc/ Hexane), afforded 42.2 mg of **2k** in 90% yield as a pale yellow solid. D<sub>2</sub> incorporation > 98%. <sup>1</sup>H NMR (500 MHz, CDCl<sub>3</sub>) δ 7.39 – 7.08 (m, 4H), 2.48 (s, 3H), 1.76 (br, 1H); <sup>13</sup>C {<sup>1</sup>H} NMR (126 MHz, CDCl<sub>3</sub>) δ 137.9, 137.7, 127.7, 126.9, 64.3 (m), 16.0.

### (4-(Dimethylamino)phenyl)methan-*d*<sub>2</sub>-ol<sup>6</sup> (**2l**, Scheme 1)

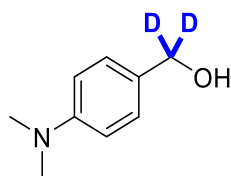

To a solution of samarium (II) iodide (0.100 M in THF; 15.0 mL, 1.50 mmol, 5.00 equiv), was added deuterium oxide (180 mg, 9.00 mmol, 30.0 equiv). A characteristic burgundy red color of SmI<sub>2</sub>-D<sub>2</sub>O complex was observed. A solution of 4-(dimethylamino)benzoyl fluoride (50.2 mg, 0.300 mmol, 1.00 equiv) in THF (1.00 mL) was then added under Ar at room temperature and stirred vigorously. After 30.0 min, excess samarium (II) iodide was oxidized by bubbling air through the reaction mixture. The reaction mixture was diluted with EtOAc (10.0 mL) and NaOH (5.00 mL, 1.00 M, aq). The aqueous layer was extracted with EtOAc (3 × 10.0 mL), organic layers were combined, washed with Na<sub>2</sub>S<sub>2</sub>O<sub>3</sub> (2 × 5.00 mL, sat., aq), dried over Na<sub>2</sub>SO<sub>4</sub>, filtered and concentrated. The crude product was purified by flash chromatography (silica, 9 - 25% EtOAc/Hexane), afforded 41.4 mg of **2l** in 90% yield as a yellow oil. D<sub>2</sub> incorporation > 98%. <sup>1</sup>H NMR (500 MHz, CDCl<sub>3</sub>) δ 7.24 (m, 2H), 6.72 (m, 2H), 2.94 (s, 6H), 1.61 (br, 1H); <sup>13</sup>C {<sup>1</sup>H} NMR (126 MHz, CDCl<sub>3</sub>) δ 150.4, 128.9, 128.7, 112.7, 64.7 (m), 40.7.

### **((3*r*,5*r*,7*r*)-Adamantan-1-yl)methan-*d*<sub>2</sub>-ol<sup>3</sup> (**2m**, Scheme 1)**

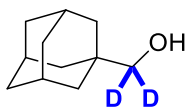

According to the general procedure, the reaction of (3*r*,5*r*,7*r*)-adamantane-1-carbonyl fluoride (54.7 mg, 0.300 mmol), samarium (II) iodide (15.0 mL, 1.50 mmol), and deuterium oxide (180 mg, 9.00 mmol), after chromatography (9 - 15% EtOAc/ Hexane), afforded 49.5 mg of **2m** in 98% yield as a white solid. D<sub>2</sub> incorporation = 98%. <sup>1</sup>H NMR (500 MHz, CDCl<sub>3</sub>) δ 1.99 (m, 3H), 1.75 – 1.72 (m, 3H), 1.67 – 1.63 (m, 3H), 1.51 (m, 6H), 1.41 (br, 1H); <sup>13</sup>C NMR (126 MHz, CDCl<sub>3</sub>) δ 73.1(m), 39.1, 37.3, 34.4, 28.2.

### **Undec-10-yn-1,1-*d*<sub>2</sub>-1-ol<sup>3</sup> (**2n**, Scheme 1)**

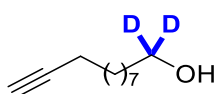

According to the general procedure, the reaction of undec-10-ynoyl fluoride (55.3 mg, 0.300 mmol), samarium (II) iodide (15.0 mL, 1.50 mmol), and deuterium oxide (180 mg, 9.00 mmol), after chromatography (9 - 17% EtOAc/ Hexane), afforded 50.1 mg of **2n** in 98% yield as a colorless oil. D<sub>2</sub> incorporation > 98%. <sup>1</sup>H NMR (500 MHz, CDCl<sub>3</sub>) δ 2.18 (td, *J* = 7.1, 2.6 Hz, 2H), 1.94 (t, *J* = 2.6 Hz, 1H), 1.63 (br, 1H), 1.58 – 1.48 (m, 4H), 1.41 – 1.27 (m, 10H); <sup>13</sup>C {<sup>1</sup>H} NMR (126 MHz, CDCl<sub>3</sub>) δ 84.8, 68.1, 62.3 (m), 32.6, 29.5, 29.4, 29.1, 28.8, 28.5, 25.7, 18.4.

### **Methyl 8-hydroxyoctanoate-8,8-*d*<sub>2</sub><sup>3</sup> (**2o**, Scheme 1)**

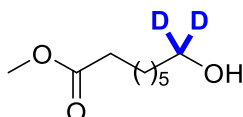

According to the general procedure, the reaction of methyl 8-fluoro-8-oxooctanoate (57.1 mg, 0.300 mmol), samarium (II) iodide (15.0 mL, 1.50 mmol), and deuterium oxide (180 mg, 9.00 mmol), after chromatography (9 - 20% EtOAc/ Hexane), afforded 42.3 mg of **2o** in 80% yield as a colorless oil. D<sub>2</sub> incorporation = 98%. <sup>1</sup>H NMR (500 MHz, CDCl<sub>3</sub>) δ 3.67 (s, 3H), 2.31 (t, *J* = 7.5 Hz, 2H), 1.63 (m, 2H), 1.54 (m, 2H), 1.37 – 1.32 (m, 6H); <sup>13</sup>C {<sup>1</sup>H} NMR (126 MHz, CDCl<sub>3</sub>) δ 174.4, 62.2 (m), 51.5, 34.1, 32.5, 29.1 (×2), 25.5, 24.9.

### **Hexadecan-1,1-*d*<sub>2</sub>-1-ol<sup>3</sup> (**2p**, Scheme 1)**

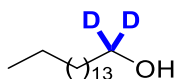

According to the general procedure, the reaction of palmitoyl fluoride (77.5 mg, 0.300 mmol), samarium (II) iodide (15.0 mL, 1.50 mmol), and deuterium oxide (180 mg, 9.00 mmol), after chromatography (9 - 20% EtOAc/ Hexane), afforded 68.2 mg of **2p** in 93% yield as a colorless oil. D<sub>2</sub> incorporation = 98%. <sup>1</sup>H NMR (500 MHz, CDCl<sub>3</sub>) δ 1.55 (t, *J* = 7.2 Hz, 2H), 1.36 – 1.23 (m, 26H), 0.88 (t, *J* = 6.9 Hz, 3H); <sup>13</sup>C {<sup>1</sup>H} NMR (126 MHz, CDCl<sub>3</sub>) δ 62.4 (m), 32.7, 32.0, 29.8(×4), 29.7(×4), 29.5(×2), 25.8, 22.8, 14.2.

### (Z)-Octadec-9-en-1,1-*d*<sub>2</sub>-1-ol<sup>3</sup> (**2q**, Scheme 1)

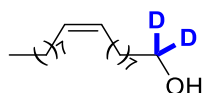

According to the general procedure, the reaction of oleoyl fluoride (85.3 mg, 0.300 mmol), samarium (II) iodide (15.0 mL, 1.50 mmol), and deuterium oxide (180 mg, 9.00 mmol), after chromatography (9-15% EtOAc/ Hexane), afforded 77.1 mg of **2q** in 95% yield as a colorless oil. D<sub>2</sub> incorporation = 98%. <sup>1</sup>H NMR (500 MHz, CDCl<sub>3</sub>) δ 5.38 – 5.30 (m, 2H), 2.05 – 1.96 (m, 4H), 1.55 (m, 2H), 1.45 – 1.13 (m, 22H), 0.88 (t, *J* = 6.9 Hz, 3H); <sup>13</sup>C{<sup>1</sup>H} NMR (126 MHz, CDCl<sub>3</sub>) δ 130.0, 129.9, 62.3 (m), 32.7, 32.0, 29.8 (×2), 29.6 (×2), 29.5, 29.4 (×2), 29.3, 27.3 (×2), 25.8, 22.8, 14.2.

### Benzo[*d*][1,3]dioxol-5-ylmethan-*d*<sub>2</sub>-ol<sup>6</sup> (**2r**, Scheme 1)

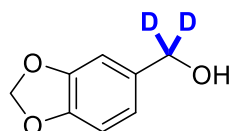

According to the general procedure, the reaction of benzo[*d*][1,3]dioxole-5-carbonyl fluoride (50.4 mg, 0.300 mmol), samarium (II) iodide (15.0 mL, 1.50 mmol), and deuterium oxide (180 mg, 9.00 mmol), after chromatography (9 - 25% EtOAc/ Hexane), afforded 41.6 mg of **2r** in 90% yield as a pale yellow oil. D<sub>2</sub> incorporation > 98%. <sup>1</sup>H NMR (500 MHz, CDCl<sub>3</sub>) δ 6.87 (d, *J* = 1.6 Hz, 1H), 6.81 (dd, *J* = 8.0, 1.6 Hz, 1H), 6.78 (d, *J* = 8.0 Hz, 1H), 5.95 (s, 2H), 1.71 (br, 1H); <sup>13</sup>C{<sup>1</sup>H} NMR (126 MHz, CDCl<sub>3</sub>) δ 147.9, 147.2, 134.8, 120.6, 108.3, 108.0, 101.1, 64.7 (m).

### 2-(4-Isobutylphenyl)propan-1,1-*d*<sub>2</sub>-1-ol<sup>7</sup> (**2s**, Scheme 1)

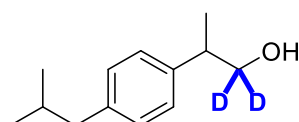

According to the general procedure, the reaction of 2-(4-isobutylphenyl)propanoyl fluoride (62.5 mg, 0.300 mmol), samarium (II) iodide (15.0 mL, 1.50 mmol), and deuterium oxide (180 mg, 9.00 mmol), after chromatography (9 - 20% EtOAc/ Hexane), afforded 52.5 mg of **2s** in 90% yield as a colorless oil. D<sub>2</sub> incorporation > 98%. <sup>1</sup>H NMR (500 MHz, CDCl<sub>3</sub>) δ 7.15 – 7.10 (m, 4H), 2.92 (q, *J* = 7.0 Hz, 1H), 2.45 (d, *J* = 7.2 Hz, 2H), 1.85 (m, 1H), 1.61 (br, 1H), 1.26 (d, *J* = 7.1 Hz, 3H), 0.90 (d, *J* = 6.6 Hz, 6H); <sup>13</sup>C{<sup>1</sup>H} NMR (126 MHz, CDCl<sub>3</sub>) δ 140.8, 140.2, 129.5, 127.2, 68.1 (m), 45.1, 41.9, 30.3, 22.5, 17.7.

### 3-(3-(Trifluoromethyl)phenyl)propan-1,1-*d*<sub>2</sub>-1-ol<sup>8</sup> (**2t**, Scheme 1)

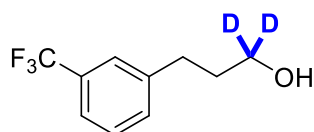

To a solution of samarium (II) iodide (0.100 M in THF; 50.0 mL, 5.00 mmol, 5.00 equiv), was added deuterium oxide (601 mg, 30.0 mmol, 30.0 equiv). A characteristic burgundy red color



of SmI<sub>2</sub>-D<sub>2</sub>O complex was observed. A solution of 3-(3-(trifluoromethyl)phenyl)propanoyl fluoride (220 mg, 1.00 mmol, 1.00 equiv), in THF (3.00 mL) was then added under Ar at room temperature and stirred vigorously. After 60.0 min, excess SmI<sub>2</sub> was oxidized by bubbling air through the reaction mixture. The reaction mixture was diluted with EtOAc (30.0 mL) and HCl (15.0 mL, 1.00 M, aq). The aqueous layer was extracted with EtOAc (3 × 30.0 mL), organic layers were combined, washed with Na<sub>2</sub>S<sub>2</sub>O<sub>3</sub> (2 × 15.0 mL, sat., aq), dried over Na<sub>2</sub>SO<sub>4</sub>, filtered and concentrated. The crude product was purified by flash chromatography (silica, 9 - 20% EtOAc/Hexane), afforded 202 mg of **2t** in 98% yield as a colorless oil. D<sub>2</sub> incorporation = 98%. <sup>1</sup>H NMR (500 MHz, CDCl<sub>3</sub>) δ 7.47 – 7.42 (m, 2H), 7.41 – 7.38 (m, 2H), 2.77 (t, *J* = 7.8 Hz, 2H), 1.89 (t, *J* = 7.8 Hz, 2H), 1.75 (br, 1H); <sup>13</sup>C {<sup>1</sup>H} NMR (126 MHz, CDCl<sub>3</sub>) δ 142.8, 131.9, 130.8 (q, *J*<sub>C-F</sub> = 32.1 Hz), 128.9, 125.2 (q, *J*<sub>C-F</sub> = 4.1 Hz), 124.3 (q, *J*<sub>C-F</sub> = 272.1 Hz), 122.8 (q, *J*<sub>C-F</sub> = 3.9 Hz), 61.2 (m), 33.8, 31.9.

## 2-Ethylhexan-1,1-d<sub>2</sub>-1-ol<sup>8</sup> (**2u**, Scheme 1)

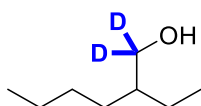

To a solution of samarium (II) iodide (0.100 M in THF; 50.0 mL, 5.00 mmol, 5.00 equiv), was added deuterium oxide (601 mg, 30.0 mmol, 30.0 equiv). A characteristic burgundy red color of SmI<sub>2</sub>-D<sub>2</sub>O complex was observed. A solution of 2-ethylhexanoyl fluoride (146 mg, 1.00 mmol, 1.00 equiv), in THF (3.00 mL) was then added under Ar at room temperature and stirred vigorously. After 60.0 min, excess SmI<sub>2</sub> was oxidized by bubbling air through the reaction mixture. The reaction mixture was diluted with EtOAc (10.0 mL) and HCl (5.00 mL, 1.00 M, aq). The aqueous layer was extracted with EtOAc (3 × 10.0 mL), organic layers were combined, washed with Na<sub>2</sub>S<sub>2</sub>O<sub>3</sub> (2 × 5.00 mL, sat., aq), dried over Na<sub>2</sub>SO<sub>4</sub>, filtered and concentrated. The crude product was purified by flash chromatography (silica, 9 - 20% EtOAc/Hexane), afforded 119 mg of **2u** in 90% yield as a colorless oil. D<sub>2</sub> incorporation = 98%. <sup>1</sup>H NMR (500 MHz, CDCl<sub>3</sub>) δ 1.42 – 1.25 (m, 9H), 0.90 (t, *J* = 6.8 Hz, 6H); <sup>13</sup>C {<sup>1</sup>H} NMR (126 MHz, CDCl<sub>3</sub>) δ 64.7 (m), 41.9, 30.2, 29.2, 23.4, 23.2, 14.2, 11.2.

## 3.4 Synthesis of (±) Cinacalcet-*d*<sub>2</sub> and 2,4-D 2-Ethylhexyl ester-*d*<sub>2</sub>

### Synthesis of (±) Cinacalcet-*d*<sub>2</sub>

#### 1-(3-Bromopropyl-3,3-*d*<sub>2</sub>)-3-(trifluoromethyl)benzene<sup>9</sup> (**3**, Scheme 1)

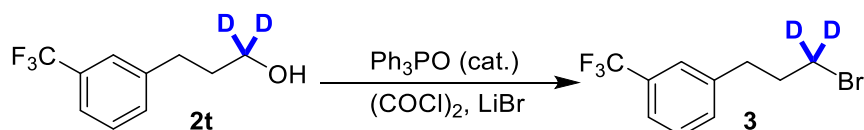

To a solution of triphenylphosphine oxide (28.0 mg, 0.100 mmol) in 1.50 mL CHCl<sub>3</sub>, were added oxalyl chloride (8.50 μL, 0.100 mmol) and LiBr (130 mg, 1.50 mmol), and the reaction mixture stirred for 5.00 min. The **2t** (103 mg, 0.500 mmol, 1.00 equiv) and oxalyl chloride (46.5 μL, 0.550 mmol) as solutions in CHCl<sub>3</sub> (1.00 mL) were then added simultaneously over

5.00 h via syringe pump at room temperature. The reaction mixture was filtered. The solvent was removed in vacuo. The crude product was purified by flash chromatography (silica, 9 - 20% EtOAc/Hexane) to afford 132 mg of **3** in 98% yield as a pale-yellow liquid. D<sub>2</sub> incorporation = 98%. <sup>1</sup>H NMR (500 MHz, CDCl<sub>3</sub>) δ 7.50 – 7.44 (m, 2H), 7.43 – 7.39 (m, 2H), 2.85 (t, *J* = 7.5 Hz, 2H), 2.18 (t, *J* = 7.5 Hz, 2H); <sup>13</sup>C{<sup>1</sup>H} NMR (126 MHz, CDCl<sub>3</sub>) δ 141.6, 132.1, 130.1 (q, *J*<sub>C-F</sub> = 32.0 Hz), 129.0, 125.3 (q, *J*<sub>C-F</sub> = 4.0 Hz), 124.2 (q, *J*<sub>C-F</sub> = 272.2 Hz), 123.2 (q, *J*<sub>C-F</sub> = 3.7 Hz), 33.8, 33.7, 32.3 (m).

### (±)Cinacalcet-*d*<sub>2</sub><sup>9</sup> (**4**, Scheme 1)

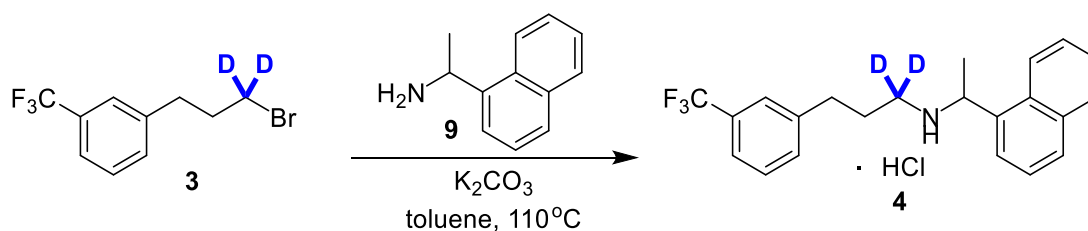

To a solution of **3** (80.7 mg, 0.300 mmol, 1.00 equiv) in toluene (1.00 mL), were added 1-(naphthalen-1-yl)ethan-1-amine **9** (62.7 mg, 0.360 mmol, 1.20 equiv) and K<sub>2</sub>CO<sub>3</sub> (82.9 mg, 0.600 mmol, 2.00 equiv) at room temperature. Then the reaction mixture was warmed to 110°C and stirred vigorously for 56 hours. The mixture was cooled to room temperature and additional K<sub>2</sub>CO<sub>3</sub> (82.9 mg, 0.600 mmol, 2.00 equiv) was added. Then, the reaction mixture was again stirred vigorously at 110°C for 16.0 hours. After cooling to room temperature, water (2.60 mL) was added and the phases separated. The aqueous phase was extracted with toluene (3 × 0.500 mL). The combined organic phases were extracted at 50°C with HCl (1.00 M, aq.; 3 × 1.00 mL) and then dried over Na<sub>2</sub>SO<sub>4</sub>, filtered, and concentrated in vacuo. Addition of n-hexane and concentration led to solid formation. The solid was washed with n-hexane (3 × 1.00 mL), then recrystallized from toluene/ n-hexane (1:3) affording 101 mg of **4** in 85% yield as a white solid. D<sub>2</sub> incorporation = 98%. <sup>1</sup>H NMR (500 MHz, CDCl<sub>3</sub>) δ 10.50 (br, 1H), 9.97 (br, 1H), 8.22 (d, *J* = 7.2 Hz, 1H), 8.00 – 7.87 (m, 3H), 7.65 – 7.53 (m, 3H), 7.31 (m, 1H), 7.24 (m, 1H), 7.21 – 7.17 (m, 2H), 5.21 (m, 1H), 2.54 (m, 2H), 2.25 (m, 2H), 1.97 (d, *J* = 6.7 Hz, 3H); <sup>13</sup>C{<sup>1</sup>H} NMR (126 MHz, CDCl<sub>3</sub>) δ 140.9, 133.9, 132.2, 131.6, 130.8, 130.7 (q, *J*<sub>C-F</sub> = 32.0 Hz), 129.6, 129.5, 128.9, 127.4, 126.3, 126.2, 125.0, 125.0 (q, *J*<sub>C-F</sub> = 3.7 Hz), 124.0 (q, *J*<sub>C-F</sub> = 272.3 Hz), 123.1 (q, *J*<sub>C-F</sub> = 4.0 Hz), 121.3, 53.5, 44.9 (m), 32.5, 27.1, 21.4.

### Synthesis of 2,4-D 2-Ethylhexyl ester-*d*<sub>2</sub>

#### 2,4-D 2-Ethylhexyl ester-*d*<sub>2</sub><sup>10</sup> (**5**, Scheme 1)

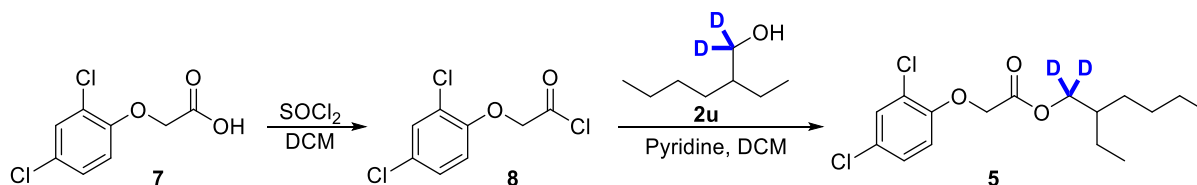

Carboxylic acid **7** (66.3 mg, 0.300 mmol, 1.00 equiv) and two drops of DMF was dissolved in

dichloromethane (5.00 mL). The solution was cooled to 0°C and oxalyl chloride (0.0305 mL, 0.360 mmol, 1.20 equiv) was added dropwise. After the reaction mixture was stirred for 3.00 hours, a solution of **2u** (39.6 mg, 0.300 mmol, 1.00 equiv) and pyridine (23.7 mg, 0.300 mmol, 1.00 equiv) in dichloromethane (15.0 mL) was added dropwise and the mixture was stirred overnight. Then the reaction mixture was diluted with EtOAc (10.0 mL) and NaOH (5.00 mL, 1.00 M, aq). The aqueous layer was extracted with EtOAc (3 × 10.0 mL). Organic layers were combined, dried over Na<sub>2</sub>SO<sub>4</sub>, filtered and concentrated. The crude product was purified by flash chromatography (silica, 6 - 11% EtOAc/Petroleum ether), afforded 77.1 mg of **5** in 80% yield as a colorless oil. D<sub>2</sub> incorporation = 98%. <sup>1</sup>H NMR (500 MHz, CDCl<sub>3</sub>) δ 7.40 (d, *J* = 2.6 Hz, 1H), 7.16 (dd, *J* = 8.8, 2.6 Hz, 1H), 6.77 (d, *J* = 8.8 Hz, 1H), 4.70 (s, 2H), 1.56 (m, 1H), 1.27 – 1.21 (m, 8H), 0.89 – 0.84 (m, 6H); <sup>13</sup>C {<sup>1</sup>H} NMR (126 MHz, CDCl<sub>3</sub>) δ 168.4, 152.5, 130.4, 127.6, 127.1, 124.3, 114.5, 67.3(m), 66.4, 38.6, 30.3, 29.8, 29.0, 23.7, 14.1, 11.0.

### 3.5 Competition Experiments between **1a** and representative carbonyl compounds

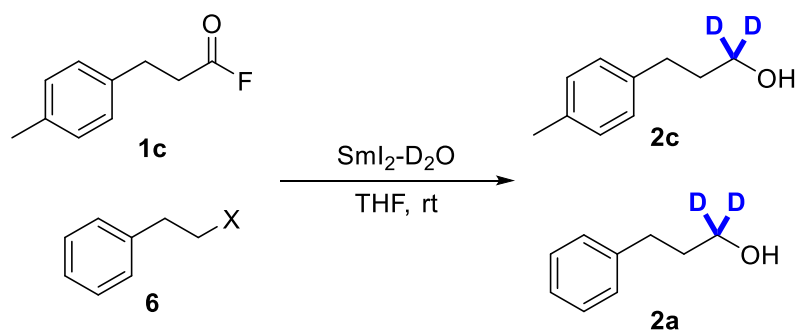

| Entry | X      | <b>2c</b> | <b>2a</b> |
|-------|--------|-----------|-----------|
| 1     | COOH   | 95%       | 5%        |
| 2     | COOEt  | 95%       | 5%        |
| 3     | COOpfp | 95%       | 5%        |

According to the general procedure, the reaction of **6** (0.200 mmol, 1.00 equiv) and **1c** (0.200 mmol, 1.00 equiv), samarium(II) iodide (0.100 M in THF; 8.00 mL, 0.800 mmol, 4.00 equiv) and deuterium oxide (96.0 mg, 4.80 mmol, 24.0 equiv) for 30.0 min at rt, afforded **2a** and **2c**. The relative quantity of each product was determined by <sup>1</sup>H NMR (500 MHz, CDCl<sub>3</sub>).

### 3.6 General Procedure for the Synthesis of Acyl fluorides

Acyl fluoride was synthesized using reported method without modification<sup>2</sup>: To a solution of the carboxylic acid (5.00 mmol, 1.00 equiv) in CH<sub>2</sub>Cl<sub>2</sub> (5.00 mL) was added Bis(2-methoxyethyl)aminosulfur trifluoride (BAST) (1.33 g, 6.00 mmol, 1.20 equiv) under Ar and

stirred for 3.00 hours at room temperature. After this time, the vial was opened, and the reaction mixture was diluted with hexanes (20.0 mL), and the mixture was added to silica gel in hexanes and stirred for 10.0 min. The combined organic layers were filtered and concentrated under reduced pressure. The residue was purified by flash chromatography on silica gel to give acid fluoride.

Note: 2-bromo-5-iodobenzoic acid cannot be converted into the corresponding acyl fluoride under the typical reaction conditions.

#### 4. The Synthesis of Acyl fluorides

##### 3-Phenylpropanoyl fluoride<sup>11</sup> (1a, Scheme 1)

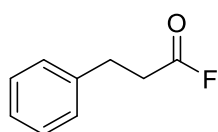

According to the general procedure, the reaction of 3-phenylpropanoic acid (751 mg, 5.00 mmol), CH<sub>2</sub>Cl<sub>2</sub> (5.00 mL), BAST (1.33 g, 6.00 mmol), after chromatography (5 - 9% EtOAc/ petroleum ether), afforded **1a** as a colorless oil. <sup>1</sup>H NMR (500 MHz, CDCl<sub>3</sub>) δ 7.36 – 7.27 (m, 2H), 7.27 – 7.17 (m, 3H), 2.99 (t, *J* = 7.6 Hz, 2H), 2.81 (t, *J* = 7.6 Hz, 2H); <sup>13</sup>C {<sup>1</sup>H} NMR (126 MHz, CDCl<sub>3</sub>) δ 162.9 (d, *J*<sub>C-F</sub> = 360.4 Hz), 139.0, 128.8, 128.3, 126.9, 33.9 (d, *J*<sub>C-F</sub> = 50.5 Hz), 30.0 (d, *J*<sub>C-F</sub> = 2.6 Hz).

##### 3-(4-Methoxyphenyl)propanoyl fluoride (1b, Scheme 1)

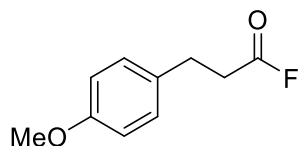

According to the general procedure, the reaction of 3-(4-methoxyphenyl)propanoic acid (901 mg, 5.00 mmol), CH<sub>2</sub>Cl<sub>2</sub> (5.00 mL), BAST (1.33 g, 6.00 mmol), after chromatography (5 - 9% EtOAc/ petroleum ether), afforded **1b** as a white solid. <sup>1</sup>H NMR (400 MHz, CDCl<sub>3</sub>) δ 7.12 (m, 2H), 6.84 (m, 2H), 3.78 (s, 3H), 2.92 (t, *J* = 7.5 Hz, 2H), 2.78 (t, *J* = 7.5 Hz, 2H); <sup>13</sup>C {<sup>1</sup>H} NMR (101 MHz, CDCl<sub>3</sub>) δ 162.9 (d, *J*<sub>C-F</sub> = 361.0 Hz), 158.5, 131.0, 129.3, 114.2, 55.3, 34.2 (d, *J*<sub>C-F</sub> = 49.9 Hz), 29.2 (d, *J*<sub>C-F</sub> = 2.2 Hz); HRMS (FTMS-ESI) *m/z*: [M - H]<sup>-</sup> (of the carboxylic acid derived from acyl fluoride) calc for C<sub>10</sub>H<sub>11</sub>O<sub>3</sub><sup>-</sup> 179.0714, found 179.0722.

##### 3-(*p*-Tolyl)propanoyl fluoride<sup>12</sup> (1c, Scheme 1)

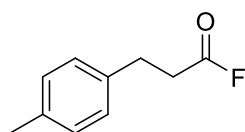

According to the general procedure, the reaction of 3-(*p*-tolyl)propanoic acid (821 mg, 5.00 mmol), CH<sub>2</sub>Cl<sub>2</sub> (5.00 mL), BAST (1.33 g, 6.00 mmol), after chromatography (5 - 9%EtOAc/ petroleum ether), afforded **1c** as a colorless oil. <sup>1</sup>H NMR (400 MHz, CDCl<sub>3</sub>) δ 7.15 – 7.05 (m,

4H), 2.94 (t,  $J = 7.6$  Hz, 2H), 2.78 (t,  $J = 7.6$  Hz, 2H), 2.32 (s, 3H);  $^{13}\text{C}\{^1\text{H}\}$  NMR (101 MHz,  $\text{CDCl}_3$ )  $\delta$  162.9 (d,  $J_{\text{C-F}} = 360.4$  Hz), 136.5, 135.9, 129.5, 128.2, 34.1 (d,  $J_{\text{C-F}} = 50.0$  Hz), 29.6 (d,  $J_{\text{C-F}} = 2.2$  Hz), 21.1.

### 3-(4-Fluorophenyl)propanoyl fluoride<sup>12</sup> (1d, Scheme 1)

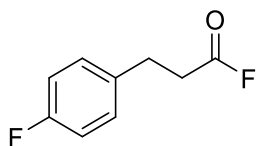

According to the general procedure, the reaction of 3-(4-fluorophenyl)propanoic acid (841 mg, 5.00 mmol),  $\text{CH}_2\text{Cl}_2$  (5.00 mL), BAST (1.33 g, 6.00 mmol), after chromatography (5 - 9% EtOAc/ petroleum ether), afforded **1d** as a colorless oil.  $^1\text{H}$  NMR (400 MHz,  $\text{CDCl}_3$ )  $\delta$  7.17 (m, 2H), 7.00 (m, 2H), 2.97 (t,  $J = 7.5$  Hz, 2H), 2.81 (t,  $J = 7.5$  Hz, 2H);  $^{13}\text{C}\{^1\text{H}\}$  NMR (101 MHz,  $\text{CDCl}_3$ )  $\delta$  163.8 (d,  $J_{\text{C-F}} = 360.5$  Hz), 160.8 (d,  $J_{\text{C-F}} = 245.1$  Hz), 134.6 (d,  $J_{\text{C-F}} = 3.3$  Hz), 129.9 (d,  $J_{\text{C-F}} = 8.0$  Hz), 115.7 (d,  $J_{\text{C-F}} = 21.3$  Hz), 34.1 (d,  $J_{\text{C-F}} = 50.5$  Hz), 29.3 (d,  $J_{\text{C-F}} = 2.4$  Hz).

### 3-(4-Chlorophenyl)propanoyl fluoride<sup>12</sup> (1e, Scheme 1)

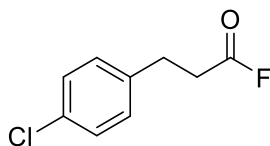

According to the general procedure, the reaction of 3-(4-chlorophenyl)propanoic acid (923 mg, 5.00 mmol),  $\text{CH}_2\text{Cl}_2$  (5.00 mL), BAST (1.33 g, 6.00 mmol), after chromatography (5 - 9% EtOAc/ petroleum ether), afforded **1e** as a colorless oil.  $^1\text{H}$  NMR (400 MHz,  $\text{CDCl}_3$ )  $\delta$  7.27 (m, 2H), 7.14 (m, 2H), 2.95 (t,  $J = 7.5$  Hz, 2H), 2.80 (t,  $J = 7.5$  Hz, 2H);  $^{13}\text{C}\{^1\text{H}\}$  NMR (101 MHz,  $\text{CDCl}_3$ )  $\delta$  162.6 (d,  $J_{\text{C-F}} = 360.7$  Hz), 137.4, 132.7, 129.7, 128.9, 33.7 (d,  $J_{\text{C-F}} = 51.2$  Hz), 29.4 (d,  $J_{\text{C-F}} = 2.3$  Hz).

### 3-(4-Bromophenyl)propanoyl fluoride<sup>12</sup> (1f, Scheme 1)

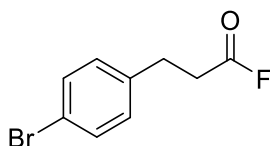

According to the general procedure, the reaction of 3-(4-bromophenyl)propanoic acid (1.15 g, 3.00 mmol),  $\text{CH}_2\text{Cl}_2$  (5.00 mL), BAST (1.33 g, 6.00 mmol), after chromatography (5 - 9% EtOAc/ petroleum ether), afforded **1f** as a white solid.  $^1\text{H}$  NMR (400 MHz,  $\text{CDCl}_3$ )  $\delta$  7.43 (m, 2H), 7.09 (m, 2H), 2.94 (t,  $J = 7.4$  Hz, 2H), 2.80 (t,  $J = 7.4$  Hz, 2H);  $^{13}\text{C}\{^1\text{H}\}$  NMR (101 MHz,  $\text{CDCl}_3$ )  $\delta$  162.6 (d,  $J_{\text{C-F}} = 360.7$  Hz), 137.9, 131.9, 130.1, 120.8, 33.7 (d,  $J_{\text{C-F}} = 50.8$  Hz), 29.4 (d,  $J_{\text{C-F}} = 2.8$  Hz).

### 3-(4-Iodophenyl)propanoyl fluoride<sup>12</sup> (**1g**, Scheme 1)

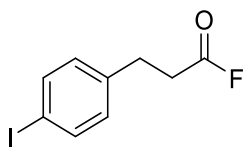

According to the general procedure, the reaction of 3-(4-iodophenyl)propanoic acid (1.38 g, 5.00 mmol), CH<sub>2</sub>Cl<sub>2</sub> (5.00 mL), BAST (1.33 g, 6.00 mmol), after chromatography (5 - 9% EtOAc/ petroleum ether), afforded **1g** as a white solid. <sup>1</sup>H NMR (400 MHz, CDCl<sub>3</sub>) δ 7.64 (m, 2H), 6.97 (m, 2H), 2.94 (t, *J* = 7.3 Hz, 2H), 2.81 (t, *J* = 7.3 Hz, 2H); <sup>13</sup>C{<sup>1</sup>H} NMR (101 MHz, CDCl<sub>3</sub>) δ 162.6 (d, *J*<sub>C-F</sub> = 360.4 Hz), 138.6, 137.9, 130.4, 92.2, 33.7 (d, *J*<sub>C-F</sub> = 50.7 Hz), 29.6 (d, *J*<sub>C-F</sub> = 2.1 Hz).

### 3-(4-(Methylthio)phenyl)propanoyl fluoride (**1h**, Scheme 1)

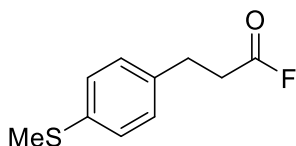

According to the general procedure, the reaction of 3-(4-(methylthio)phenyl)propanoic acid (981 mg, 5.00 mmol), CH<sub>2</sub>Cl<sub>2</sub> (5.00 mL), BAST (1.33 g, 6.00 mmol), after chromatography (5 - 9% EtOAc/ petroleum ether), afforded **1h** as a colorless oil. <sup>1</sup>H NMR (400 MHz, CDCl<sub>3</sub>) δ 7.21 (m, 2H), 7.13 (m, 2H), 2.94 (t, *J* = 7.5 Hz, 2H), 2.80 (t, *J* = 7.5 Hz, 2H), 2.46 (s, 3H); <sup>13</sup>C{<sup>1</sup>H} NMR (101 MHz, CDCl<sub>3</sub>) δ 162.8 (d, *J*<sub>C-F</sub> = 360.3 Hz), 136.9, 135.8, 128.8, 127.2, 33.9 (d, *J*<sub>C-F</sub> = 50.5 Hz), 29.5 (d, *J*<sub>C-F</sub> = 2.3 Hz), 16.0; HRMS (FTMS-ESI) *m/z*: [M - H]<sup>-</sup> (of the carboxylic acid derived from acyl fluoride) calc for C<sub>10</sub>H<sub>11</sub>O<sub>2</sub>S<sup>-</sup> 195.0485, found 195.0491.

### 2-(4-(*Tert*-butyl)phenyl)acetyl fluoride (**1i**, Scheme 1)

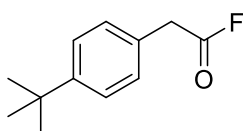

According to the general procedure, the reaction of 2-(4-(*tert*-butyl)phenyl)acetic acid (971 mg, 5.00 mmol), CH<sub>2</sub>Cl<sub>2</sub> (5.00 mL), BAST (1.33 g, 6.00 mmol), after chromatography (5 - 9% EtOAc/ petroleum ether), afforded **1i** as colorless oil. <sup>1</sup>H NMR (500 MHz, CDCl<sub>3</sub>) δ 7.39 (m, 2H), 7.22 (m, 2H), 3.77 (s, 2H), 1.32 (s, 9H); <sup>13</sup>C{<sup>1</sup>H} NMR (126 MHz, CDCl<sub>3</sub>) δ 161.7 (d, *J*<sub>C-F</sub> = 362.1 Hz), 151.1, 129.0, 127.8 (d, *J*<sub>C-F</sub> = 2.4 Hz), 126.0, 38.5 (d, *J*<sub>C-F</sub> = 54.3 Hz), 34.6, 31.3; HRMS (FTMS-ESI) *m/z*: [M - H]<sup>-</sup> (of the carboxylic acid derived from acyl fluoride) calc for C<sub>12</sub>H<sub>15</sub>O<sub>2</sub><sup>-</sup> 191.1078, found 191.1081.

#### 4-Methoxybenzoyl fluoride<sup>12</sup> (**1j**, Scheme 1)

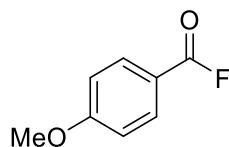

According to the general procedure, the reaction of 4-methoxybenzoic acid (761 mg, 5.00 mmol), CH<sub>2</sub>Cl<sub>2</sub> (5.00 mL), BAST (1.33 g, 6.00 mmol), after chromatography (5 - 9% EtOAc/ petroleum ether), afforded **1j** as a colorless oil. <sup>1</sup>H NMR (400 MHz, CDCl<sub>3</sub>) δ 7.99 (m, 2H), 6.98 (m, 2H), 3.90 (s, 3H); <sup>13</sup>C{<sup>1</sup>H} NMR (101 MHz, CDCl<sub>3</sub>) δ 165.3, 157.3 (d, *J*<sub>C-F</sub> = 340.0 Hz), 133.8 (d, *J*<sub>C-F</sub> = 3.8 Hz), 116.9 (d, *J*<sub>C-F</sub> = 61.8 Hz), 114.5, 55.7.

#### 4-(Methylthio)benzoyl fluoride<sup>13</sup> (**1k**, Scheme 1)

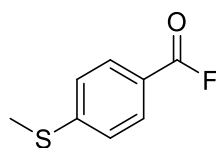

According to the general procedure, the reaction of 4-(methylthio)benzoic acid (841 mg, 5.00 mmol), CH<sub>2</sub>Cl<sub>2</sub> (5.00 mL), BAST (1.33 g, 6.00 mmol), after chromatography (5 - 9% EtOAc/ petroleum ether), afforded **1k** as a colorless oil. <sup>1</sup>H NMR (500 MHz, CDCl<sub>3</sub>) δ 7.90 (m, 2H), 7.29 (m, 2H), 2.53 (s, 3H); <sup>13</sup>C{<sup>1</sup>H} NMR (126 MHz, CDCl<sub>3</sub>) δ 157.3 (d, *J*<sub>C-F</sub> = 341.2 Hz), 149.4, 131.5 (d, *J*<sub>C-F</sub> = 3.8 Hz), 125.1, 120.4 (d, *J*<sub>C-F</sub> = 62.1 Hz), 14.5.

#### 4-(Dimethylamino)benzoyl fluoride<sup>14</sup> (**1l**, Scheme 1)

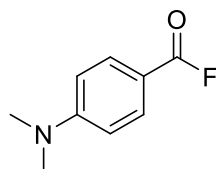

According to the general procedure, the reaction of 4-(dimethylamino)benzoic acid (826 mg, 5.00 mmol), CH<sub>2</sub>Cl<sub>2</sub> (5.00 mL), BAST (1.33 g, 6.00 mmol), after chromatography (5 - 9% EtOAc/ petroleum ether), afforded **1l** as a white solid. <sup>1</sup>H NMR (500 MHz, CDCl<sub>3</sub>) δ 7.85 (m, 2H), 6.64 (m, 2H), 3.08 (s, 6H); <sup>13</sup>C{<sup>1</sup>H} NMR (126 MHz, CDCl<sub>3</sub>) δ 158.2 (d, *J*<sub>C-F</sub> = 334.6 Hz), 154.6, 133.4 (d, *J*<sub>C-F</sub> = 4.0 Hz), 111.0, 110.2 (d, *J*<sub>C-F</sub> = 61.1 Hz), 40.0.

#### (3*r*,5*r*,7*r*)-Adamantane-1-carbonyl fluoride<sup>12</sup> (**1m**, Scheme 1)

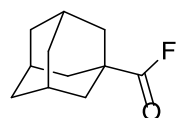

According to the general procedure, the reaction of (3*r*,5*r*,7*r*)-adamantane-1-carboxylic acid (901 mg, 5.00 mmol), CH<sub>2</sub>Cl<sub>2</sub> (5.00 mL), BAST (1.33 g, 6.00 mmol), after chromatography (5 - 9% EtOAc/ petroleum ether), afforded **1m** as a white solid. <sup>1</sup>H NMR (400 MHz, CDCl<sub>3</sub>) δ 2.07 (m, 3H), 1.97 (m, 6H), 1.74 (m, 6H); <sup>13</sup>C{<sup>1</sup>H} NMR (101 MHz, CDCl<sub>3</sub>) δ 167.1 (d, *J*<sub>C-F</sub> = 373.0 Hz), 40.5 (d, *J*<sub>C-F</sub> = 43.9 Hz), 37.9, 35.8, 27.4.

### Undec-10-ynoyl fluoride (**1n**, Scheme 1)

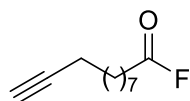

According to the general procedure, the reaction of undec-10-ynoic acid (911 mg, 5.00 mmol), CH<sub>2</sub>Cl<sub>2</sub> (5.00 mL), BAST (1.33 g, 6.00 mmol), after chromatography (5 - 9% EtOAc/ petroleum ether), afforded **1n** as a colorless oil. <sup>1</sup>H NMR (500 MHz, CDCl<sub>3</sub>) δ 2.50 (m, 2H), 2.18 (m, 2H), 1.94 (m, 1H), 1.68 (m, 2H), 1.52 (m, 2H), 1.41 – 1.27 (m, 8H); <sup>13</sup>C{<sup>1</sup>H}NMR (126 MHz, CDCl<sub>3</sub>) δ 163.6 (d, *J*<sub>C-F</sub> = 360.4 Hz), 84.6, 68.2, 32.1 (d, *J*<sub>C-F</sub> = 49.7 Hz), 28.9, 28.8, 28.6, 28.6, 28.4, 23.9 (d, *J*<sub>C-F</sub> = 1.26 Hz), 18.4; HRMS (FTMS-ESI) *m/z*: [M – H]<sup>–</sup> (of the carboxylic acid derived from acyl fluoride) calc for C<sub>11</sub>H<sub>17</sub>O<sub>2</sub><sup>–</sup> 181.1234, found 181.1234.

### Methyl 8-fluoro-8-oxooctanoate (**1o**, Scheme 1)

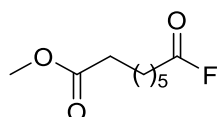

According to the general procedure, the reaction of 8-methoxy-8-oxooctanoic acid (941mg, 5.00 mmol), CH<sub>2</sub>Cl<sub>2</sub> (5.00 mL), BAST (1.33 g, 6.00 mmol), after chromatography (5 - 9% EtOAc/ petroleum ether), afforded **1o** as a colorless oil. <sup>1</sup>H NMR (400 MHz, CDCl<sub>3</sub>) δ 3.67 (s, 3H), 2.51 (t, *J* = 7.3 Hz, 2H), 2.32 (t, *J* = 7.5 Hz, 2H), 1.73 – 1.60 (m, 4H), 1.45 – 1.31 (m, 4H); <sup>13</sup>C{<sup>1</sup>H} NMR (101 MHz, CDCl<sub>3</sub>) δ 174.1, 163.5 (d, *J*<sub>C-F</sub> = 360.5 Hz), 51.5, 33.9, 32.0 (d, *J*<sub>C-F</sub> = 50.0 Hz), 28.6, 28.3, 24.6, 23.7; HRMS (FTMS-ESI) *m/z*: [M – H]<sup>–</sup> (of the carboxylic acid derived from acyl fluoride) calc for C<sub>9</sub>H<sub>15</sub>O<sub>4</sub><sup>–</sup> 187.0976, found 187.0982.

### Palmitoyl fluoride<sup>12</sup> (**1p**, Scheme 1)

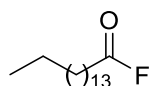

According to the general procedure, the reaction of palmitic acid (1.28 g, 5.00 mmol), CH<sub>2</sub>Cl<sub>2</sub> (5.00 mL), BAST (1.33 g, 6.00 mmol), after chromatography (5 - 9% EtOAc/ petroleum ether), afforded **1p** as a white solid. <sup>1</sup>H NMR (400 MHz, CDCl<sub>3</sub>) δ 2.49 (t, *J* = 7.4 Hz, 2H), 1.67 (m, 2H), 1.38 – 1.24 (m, 24H), 0.88 (t, *J* = 6.6 Hz, 3H); <sup>13</sup>C{<sup>1</sup>H} NMR (101 MHz, CDCl<sub>3</sub>) δ 163.6 (d, *J*<sub>C-F</sub> = 360.4 Hz), 32.2 (d, *J*<sub>C-F</sub> = 40.7 Hz), 32.0, 29.8 (×6), 29.5 (×2), 29.2, 28.8, 24.0, 22.8, 14.2.

### Oleoyl fluoride (**1q**, Scheme 1)

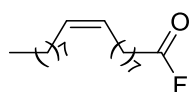

According to the general procedure, the reaction of oleic acid (1.41 g, 5.00 mmol), CH<sub>2</sub>Cl<sub>2</sub> (5.00 mL), BAST (1.33 g, 6.00 mmol), after chromatography (5 - 9% EtOAc/ petroleum ether), afforded **1q** as a colorless oil. <sup>1</sup>H NMR (500 MHz, CDCl<sub>3</sub>) δ 5.39 – 5.30 (m, 2H), 2.50 (t, *J* =



7.4 Hz, 2H), 2.09 – 1.91 (m, 4H), 1.68 (p,  $J = 7.3$  Hz, 2H), 1.42 – 1.18 (m, 20H), 0.88 (t,  $J = 6.7$  Hz, 3H);  $^{13}\text{C}\{^1\text{H}\}$  NMR (126 MHz,  $\text{CDCl}_3$ )  $\delta$  163.7 (d,  $J_{\text{C-F}} = 360.6$  Hz), 130.2, 129.7, 32.2 (d,  $J_{\text{C-F}} = 50.0$  Hz), 32.0, 29.9, 29.7, 29.6, 29.4 ( $\times 2$ ), 29.1 ( $\times 2$ ), 28.8, 27.3, 27.2, 24.0 (d,  $J_{\text{C-F}} = 1.3$  Hz), 22.8, 14.2; HRMS (FTMS-ESI)  $m/z$ :  $[\text{M} - \text{H}]^-$  (of the carboxylic acid derived from acyl fluoride) calc for  $\text{C}_{18}\text{H}_{33}\text{O}_2^-$  281.2486, found 281.2494.

### Benzo[*d*][1,3]dioxole-5-carbonyl fluoride<sup>15</sup> (**1r**, Scheme 1)

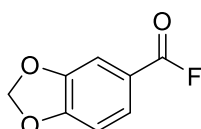

According to the general procedure, the reaction of benzo[*d*][1,3]dioxole-5-carboxylic acid (831 mg, 5.00 mmol),  $\text{CH}_2\text{Cl}_2$  (5.00 mL), BAST (1.33 g, 6.00 mmol), after chromatography (5 - 9% EtOAc/ petroleum ether), afforded **1r** as a white solid.  $^1\text{H}$  NMR (500 MHz,  $\text{CDCl}_3$ )  $\delta$  7.67 (m, 1H), 7.41 (m, 1H), 6.90 (m, 1H), 6.10 (s, 2H);  $^{13}\text{C}\{^1\text{H}\}$  NMR (126 MHz,  $\text{CDCl}_3$ )  $\delta$  156.9 (d,  $J_{\text{C-F}} = 340.1$  Hz), 153.8, 148.4, 128.3 (d,  $J_{\text{C-F}} = 4.4$  Hz), 118.4 (d,  $J_{\text{C-F}} = 62.2$  Hz), 110.7 (d,  $J_{\text{C-F}} = 4.4$  Hz), 108.7, 102.5.

### 2-(4-Isobutylphenyl)propanoyl fluoride<sup>14</sup> (**1s**, Scheme 1)

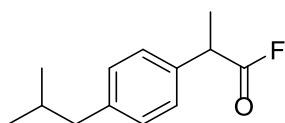

According to the general procedure, the reaction of 2-(4-isobutylphenyl)propanoic acid (1.03 g, 5.00 mmol),  $\text{CH}_2\text{Cl}_2$  (5.00 mL), BAST (1.33 g, 6.00 mmol), after chromatography (5 - 9% EtOAc/ petroleum ether), afforded **1s** as a colorless oil.  $^1\text{H}$  NMR (500 MHz,  $\text{CDCl}_3$ )  $\delta$  7.20 (m, 2H), 7.14 (m, 2H), 3.84 (m, 1H), 2.47 (m, 2H), 1.85 (m, 1H), 1.58 (m, 3H), 0.90 (m, 6H);  $^{13}\text{C}\{^1\text{H}\}$  NMR (126 MHz,  $\text{CDCl}_3$ )  $\delta$  164.5 (d,  $J_{\text{C-F}} = 367.0$  Hz), 141.7, 134.7, 129.8, 127.3, 45.1, 44.0 (d,  $J_{\text{C-F}} = 49.1$  Hz), 30.2, 22.4, 18.1.

### 3-(3-(Trifluoromethyl)phenyl)propanoyl fluoride (**1t**, Scheme 1)

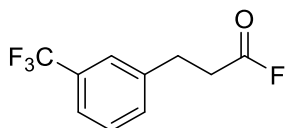

According to the general procedure, the reaction of 3-(3-(trifluoromethyl)phenyl)propanoic acid (1.09 g, 5.00 mmol),  $\text{CH}_2\text{Cl}_2$  (5.00 mL), BAST (1.33 g, 6.00 mmol), after chromatography (5 - 9% EtOAc/ petroleum ether), afforded **1t** as a colorless oil.  $^1\text{H}$  NMR (400 MHz,  $\text{CDCl}_3$ )  $\delta$  7.52 (m, 1H), 7.47 (m, 1H), 7.45 – 7.39 (m, 2H), 3.06 (t,  $J = 7.5$  Hz, 2H), 2.86 (t,  $J = 7.5$  Hz, 2H);  $^{13}\text{C}\{^1\text{H}\}$  NMR (101 MHz,  $\text{CDCl}_3$ )  $\delta$  162.5 (d,  $J_{\text{C-F}} = 360.2$  Hz), 139.8, 131.8, 131.2 (q,  $J_{\text{C-F}} = 32.4$  Hz), 129.4, 125.1 (q,  $J_{\text{C-F}} = 3.8$  Hz), 124.1 (q,  $J_{\text{C-F}} = 272.7$  Hz), 123.9 (q,  $J_{\text{C-F}} = 3.7$  Hz), 33.6 (d,  $J_{\text{C-F}} = 51.5$  Hz), 29.8 (d,  $J_{\text{C-F}} = 2.9$  Hz); HRMS (FTMS-ESI)  $m/z$ :  $[\text{M} - \text{H}]^-$  (of the carboxylic acid derived from acyl fluoride) calc for  $\text{C}_{10}\text{H}_8\text{F}_3\text{O}_2^-$  217.0482, found 217.0488.

## 2-Ethylhexanoyl fluoride<sup>16</sup> (**1u**, Scheme 1)

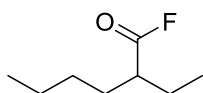

According to the general procedure, the reaction of 2-ethylhexanoic acid (721 mg, 5.00 mmol), CH<sub>2</sub>Cl<sub>2</sub> (5.00 mL), BAST (1.33 g, 6.00 mmol), after chromatography (5 - 9% EtOAc/petroleum ether), afforded **1u** as a colorless oil. <sup>1</sup>H NMR (500 MHz, CDCl<sub>3</sub>) δ 2.46 (m, 1H), 1.76 – 1.60 (m, 4H), 1.38 – 1.29 (m, 4H), 0.97 (m, 3H), 0.91 (m, 3H); <sup>13</sup>C{<sup>1</sup>H} NMR (126 MHz, CDCl<sub>3</sub>) δ 165.8 (d, *J*<sub>C-F</sub> = 369.5 Hz), 46.0 (d, *J*<sub>C-F</sub> = 44.7 Hz), 30.6, 29.3, 24.4, 22.5, 13.9, 11.5.

## 5. Computational Details

**Computational Methods.** All calculations of the solution phase electrochemical redox potentials were performed using Gaussian 09 suite of programs according to the procedure described by Nicewicz et al. (Roth, H. G.; Romero, N. A.; Nicewicz, D. A. *Synlett* **2016**, 27, 714) at the B3LYP/6-311++G(d,p) and B3LYP/6-311++G(d,p)+QZVP level of theory. All of the optimized geometries were verified as minima (no imaginary frequencies). Previous studies have shown that this method gives an excellent agreement with the published data for available compounds (Shi, S.; Lalancette, R.; Szostak, R.; Szostak, M. *Chem. Eur. J.* **2016**, 22, 11949; Shi, S.; Szostak, R.; Szostak, M. *Org. Biomol. Chem.* **2016**, 14, 9151 and references cited therein). Studies on the determination of the redox potential of Sm(II) reductants have been published (Dahleń, A.; Nilsson, A.; Hilmersson, G. *J. Org. Chem.* **2006**, 71, 1576; Szostak, M.; Spain, M.; Procter, D. J. *J. Org. Chem.* **2014**, 79, 2522 and references cited therein). Note that the established accuracy in experimentally measured redox potentials due to solvent effects is ±0.1 V (Bard, A. J. *Encyclopedia of Electrochemistry of the Elements*, Marcel Dekker, 1978; Bard, A. J.; Faulkner, L. R. *Electrochemical Methods: Fundamentals and Applications*, Wiley, 2000). For selected monographs, see: Vanysek, P. *CRC Handbook of Chemistry and Physics*,

CRC Press, 2000; Bard, A. J. *Encyclopedia of Electrochemistry of the Elements*, Marcel Dekker, 1978.

### **Full Reference for Gaussian 09**

Gaussian 09, Revision D.01, Frisch, M. J.; Trucks, G. W.; Schlegel, H. B.; Scuseria, G. E.; Robb, M. A.; Cheeseman, J. R.; Scalmani, G.; Barone, V.; Mennucci, B.; Petersson, G. A.; Nakatsuji, H.; Caricato, M.; Li, X.; Hratchian, H. P.; Izmaylov, A. F.; Bloino, J.; Zheng, G.; Sonnenberg, J. L.; Hada, M.; Ehara, M.; Toyota, K.; Fukuda, R.; Hasegawa, J.; Ishida, M.; Nakajima, T.; Honda, Y.; Kitao, O.; Nakai, H.; Vreven, T.; Montgomery, J. A., Jr.; Peralta, J. E.; Ogliaro, F.; Bearpark, M.; Heyd, J. J.; Brothers, E.; Kudin, K. N.; Staroverov, V. N.; Kobayashi, R.; Normand, J.; Raghavachari, K.; Rendell, A.; Burant, J. C.; Iyengar, S. S.; Tomasi, J.; Cossi, M.; Rega, N.; Millam, M. J.; Klene, M.; Knox, J. E.; Cross, J. B.; Bakken, V.; Adamo, C.; Jaramillo, J.; Gomperts, R.; Stratmann, R. E.; Yazyev, O.; Austin, A. J.; Cammi, R.; Pomelli, C.; Ochterski, J. W.; Martin, R. L.; Morokuma, K.; Zakrzewski, V. G.; Voth, G. A.; Salvador, P.; Dannenberg, J. J.; Dapprich, S.; Daniels, A. D.; Farkas, Ö.; Foresman, J. B.; Ortiz, J. V.; Cioslowski, J.; Fox, D. J. Gaussian, Inc., Wallingford CT, 2009.

**Table SI-1.** Redox Potentials of Compounds **SI-1-SI-11** vs. SCE in CH<sub>3</sub>CN Calculated at the B3LYP/6-311++G(d,p) Level.<sup>a</sup>

| Entry | Compound            | Entry        | G°<br>(neutral) | G°<br>(ketyl radical) | DG° <sub>1/2</sub><br>[kcal/mol] | E° <sub>1/2</sub><br>[V] |
|-------|---------------------|--------------|-----------------|-----------------------|----------------------------------|--------------------------|
| 1     | PhCHO               | <b>SI-1</b>  | -345.597605     | -345.695655           | -61.55                           | -1.75                    |
| 2     | PhCOF               | <b>SI-2</b>  | -444.900051     | -445.001153           | -63.46                           | -1.67                    |
| 3     | PhCOCl              | <b>SI-3</b>  | -805.246540     | -805.357003           | -69.34                           | -1.42                    |
| 4     | PhCOBr              | <b>SI-4</b>  | -2919.168282    | -2919.282476          | -71.68                           | -1.31                    |
| 5     | PhCHO               | <b>SI-1</b>  | -345.599397     | -345.697456           | -61.55                           | -3.83                    |
| 6     | PhCOF               | <b>SI-2</b>  | -345.592259     | -345.614142           | -13.74                           | -3.70                    |
| 7     | PhCOCl              | <b>SI-3</b>  | -444.910680     | -444.937281           | -16.70                           | -3.40                    |
| 8     | PhCOBr              | <b>SI-4</b>  | -805.257224     | -805.294869           | -23.63                           | -3.27                    |
| 9     | PhCOI               | <b>SI-5</b>  | -2919.252123    | -2919.294529          | -26.62                           | -3.16                    |
| 10    | MeCOF               | <b>SI-6</b>  | -253.164766     | -253.242401           | -48.73                           | -2.31                    |
| 11    | <i>t</i> -BuCOF     | <b>SI-7</b>  | -371.058462     | -371.134777           | -47.90                           | -2.34                    |
| 12    | CF <sub>3</sub> COF | <b>SI-8</b>  | -550.983489     | -551.100578           | -73.50                           | -1.23                    |
| 13    | PhCOMe              | <b>SI-9</b>  | -384.905288     | -384.996967           | -57.55                           | -1.93                    |
| 14    | MeCHO               | <b>SI-10</b> | -153.858517     | -153.925210           | -41.86                           | -2.61                    |
| 15    | MeCOMe              | <b>SI-11</b> | -193.169706     | -193.229377           | -37.46                           | -2.80                    |

<sup>a</sup>DG°<sub>1/2</sub> = G°(ketyl radical) – G°(neutral). See Roth, H. G.; Romero, N. A.; Nicewicz, D. A. *Synlett* **2016**, 27, 714 for details. The accuracy is approximately ± 0.1 V due to solvent effects. Entries 1-4, 10-15: B3LYP/6-311++G(d,p), CH<sub>3</sub>CN; Entries 5-9: B3LYP/6-311++G(d,p)+QZVP, in vacuum. Redox potentials of compounds SI-9, SI-10 and SI-11 have been previously reported (Shi, S.; Szostak, R.; Szostak, M. *Org. Biomol. Chem.* **2016**, 14, 9151 and references cited therein).

**Additional Discussion.** In addition to compounds shown in Figure 1 in the main manuscript, we have also determined redox potentials of the corresponding trifluoromethyl derivatives, CF<sub>3</sub>COX (Table SI-2). Structures of all compounds **SI-1-SI-15** are shown in Chart SI-1 below.

While the reduction potential of the corresponding benzoyl chloride and benzoyl bromide was determined in CH<sub>3</sub>CN (*Synlett* **2016**, 27, 714), we found that under these conditions (CH<sub>3</sub>CN) the corresponding iodide, PhCOI underwent dissociation of the ketyl radical to release iodide anion. Furthermore, in the case of less stabilized  $\alpha$ -aliphatic derivatives (alkyl vs. benzyl) even the corresponding acyl bromides and acyl chlorides (e.g. MeCOBr, MeCOCl) underwent dissociation of bromide and chloride anions from their corresponding ketyl radicals, consistent with the high instability of the ketyl radicals.

Interestingly, we found that all  $\alpha$ -trifluoromethyl CF<sub>3</sub>COX derivatives (X = H, F, Cl, Br, I) are stable and characterized by a significantly lower redox potential than benzoyl halides (CF<sub>3</sub>CHO, E<sub>1/2</sub> = -1.28 V vs. SCE in CH<sub>3</sub>CN vs. PhCHO, E<sub>1/2</sub> = -1.75 V vs. SCE in CH<sub>3</sub>CN; CF<sub>3</sub>COF, E<sub>1/2</sub> = -1.29 V vs. SCE in CH<sub>3</sub>CN vs. PhCOF, E<sub>1/2</sub> = -1.70 V vs. SCE in CH<sub>3</sub>CN; CF<sub>3</sub>COCl, E<sub>1/2</sub> = -0.95 V vs. SCE in CH<sub>3</sub>CN vs. PhCOCl, E<sub>1/2</sub> = -1.46 V vs. SCE in CH<sub>3</sub>CN; CF<sub>3</sub>COBr, E<sub>1/2</sub> = -0.77 V vs. SCE in CH<sub>3</sub>CN vs. PhCOBr, E<sub>1/2</sub> = -1.37 V vs. SCE in CH<sub>3</sub>CN; CF<sub>3</sub>COI, E<sub>1/2</sub> = -0.71 V vs. SCE in CH<sub>3</sub>CN vs. PhCOI, E<sub>1/2</sub> = -1.30 V vs. SCE in CH<sub>3</sub>CN, approximated value) (Chart SI-2). This finding allows to further support the observed correlation with respect to the reduction potentials in the series PhCOX (X = H, F, Cl, Br, I) (Chart SI-3 and Chart SI-4). Furthermore, these findings indicate the relative order of the stability of ketyl radicals with respect to the  $\alpha$ -stabilizing group: CF<sub>3</sub> > Ph > alkyl. Thus, our study strongly suggests that acyl fluorides should behave as privileged acid halide precursors for the generation of ketyl type radicals (X = F vs. Cl, Br, I) for synthetic applications, including reductions, reductive cyclizations and tandem reductive couplings.

Further studies on the investigation of carboxylic acid derivatives to facilitate electron transfer to the carbonyl group are underway in our laboratories and will be reported in due course.

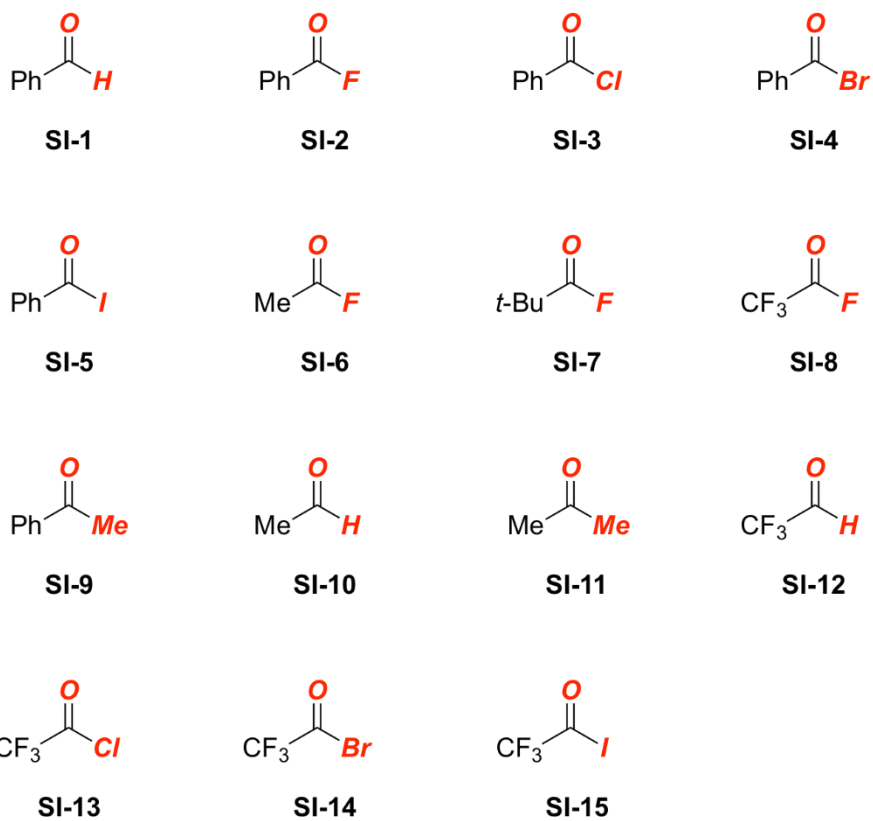

**Chart SI-1.** Structures of Esters **SI-1-SI-15** used for Determination of Redox Potentials at the *B3LYP/6-311++G(d,p)* Level.

**Table SI-2.** Redox Potentials of Compounds **SI-8**, **SI-12-SI-15** vs. SCE in  $CH_3CN$  Calculated at the B3LYP/6-311++G(d,p)+QZVP Level.<sup>a</sup>

| Entry | Compound             | Entry        | $G^\circ$<br>(neutral) | $G^\circ$<br>(ketyl radical) | $DG^\circ_{1/2}$<br>[kcal/mol] | $E^\circ_{1/2}$<br>[V] |
|-------|----------------------|--------------|------------------------|------------------------------|--------------------------------|------------------------|
| 1     | CF <sub>3</sub> CHO  | <b>SI-12</b> | -451.692407            | -451.807932                  | -72.52                         | -1.28                  |
| 2     | CF <sub>3</sub> COF  | <b>SI-8</b>  | -551.001763            | -551.116751                  | -72.18                         | -1.29                  |
| 3     | CF <sub>3</sub> COCl | <b>SI-13</b> | -911.351053            | -911.478507                  | -80.00                         | -0.95                  |
| 4     | CF <sub>3</sub> COBr | <b>SI-14</b> | -3025.345608           | -3025.479897                 | -84.29                         | -0.77                  |
| 5     | CF <sub>3</sub> COI  | <b>SI-15</b> | -748.912177            | -749.048379                  | -85.50                         | -0.71                  |

<sup>a</sup> $DG^\circ_{1/2} = G^\circ(\text{ketyl radical}) - G^\circ(\text{neutral})$ . See Roth, H. G.; Romero, N. A.; Nicewicz, D. A. *Synlett* **2016**, 27, 714 for details. The accuracy is approximately  $\pm 0.1$  V due to solvent effects (Shi, S.; Szostak, R.; Szostak, M. *Org. Biomol. Chem.* **2016**, 14, 9151 and references cited therein).

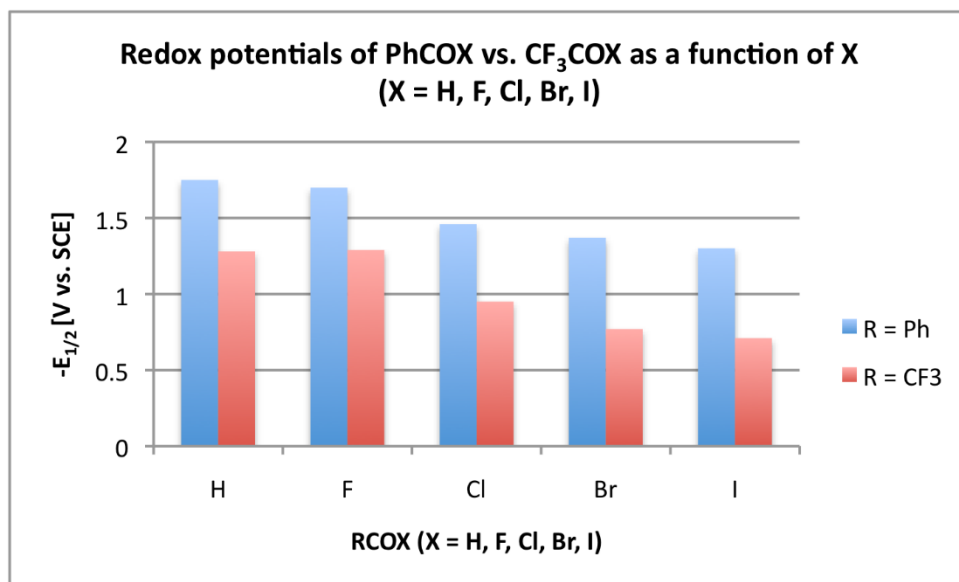

**Chart SI-2.** Redox Potentials of PhCOX ( $X = H, F, Br, Cl$ ) in  $CH_3CN$  vs.  $CF_3COX$  ( $X = H, F, Br, Cl$ ) in  $CH_3CN$  at B3LYP/6-311++G(d,p)+QZVP.

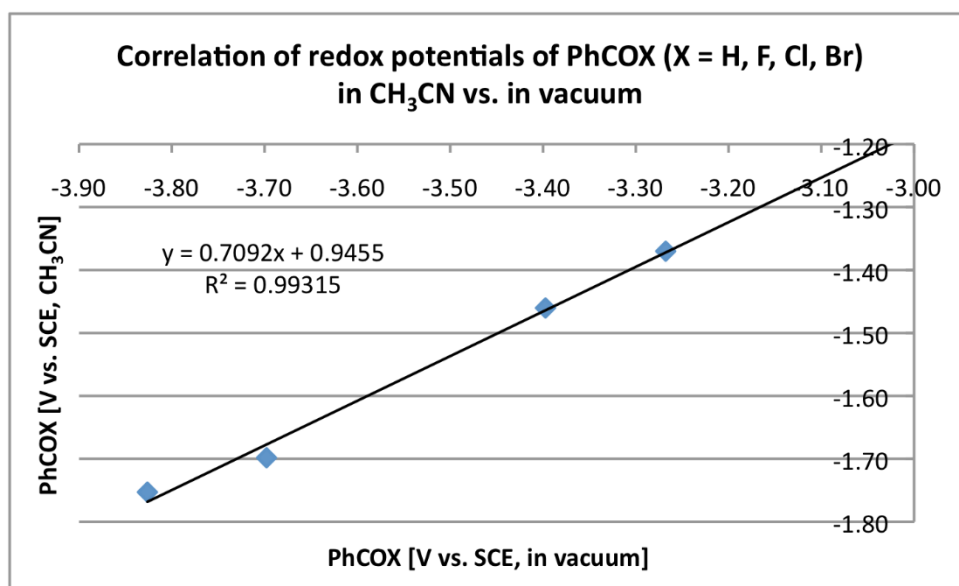

**Chart SI-3.** Correlation of Redox Potentials of PhCOX (X = H, F, Br, Cl) in CH<sub>3</sub>CN vs. in Vacuum Calculated at B3LYP/6-311++G(d,p)+QZVP ( $Y = 0.71X + 0.95$ ,  $R^2 = 0.993$ ). PhCOI,  $E_{1/2} = -1.2946$  V vs. SCE.

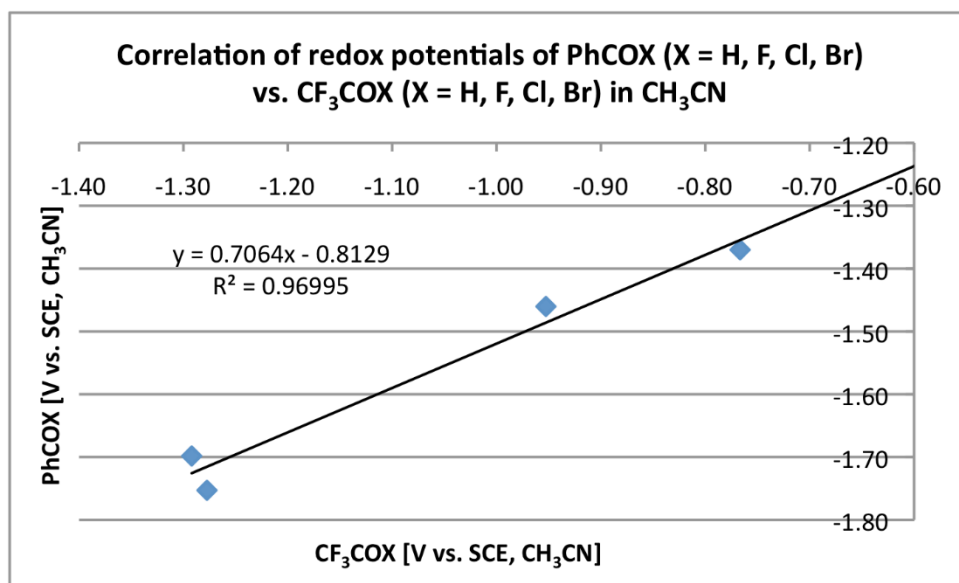

**Chart SI-4.** Correlation of Redox Potentials of PhCOX (X = H, F, Br, Cl) in CH<sub>3</sub>CN vs. CF<sub>3</sub>COX (X = H, F, Br, Cl) in CH<sub>3</sub>CN at B3LYP/6-311++G(d,p)+QZVP ( $Y = 0.71X - 0.81$ ,  $R^2 = 0.970$ ). PhCOI,  $E_{1/2} = -1.3180$  V vs. SCE.



## 6. References

- (1) M. Szostak, M. Spain and D. J. Procter, *Nat. Protoc.*, 2012, **7**, 970–977.
- (2) G. S. Lal, G. P. Pez, R. J. Pesaresi, F. M. Prozonc and H Cheng, *J. Org. Chem.* 1999, **64**, 7048–7054
- (3) H. Li, Y. Hou, C. Liu, Z. Lai, L. Ning, R. Szostak, M. Szostak and J. An, *Org. Lett.*, 2020, **22**, 1249–1253
- (4) K. Miyamoto, M. Hirobe, M. Saito, M. Shiro and M. Ochiai, *Org. Lett.*, 2007, **9**, 1995–1998.
- (5) B. S. Bodnar and P. F. Vogt, *J. Org. Chem.*, 2009, **74**, 2598–2600
- (6) N. S. Shaikh, K. Junge and M. Beller, *Org. Lett.*, 2007, **9**, 5429–5432
- (7) M. Han, X. Ma, S. Yao, Y. Ding, Z. Yan, A. Adijiang, Y. Wu, H. Li, Y. Zhang, P. Lei, Y. Ling and J. An, *J. Org. Chem.*, 2017, **82**, 1285–1290.
- (8) Commercially available from Aldlab Chemicals.
- (9) S. Kramer, *Org. Lett.*, 2019, **21**, 65–69
- (10) T. Praczyk, P. Kardasz, E. Jakubiak, A. Syguda, K. Materna and J. Pernak, *Weed Sci.*, 2012, **60**, 189–192
- (11) F. Beaulieu, L. P. Beauregard, G. Courchesne, M. Couturier, F. Laflamme and A. L’Heureux, *Org. Lett.*, 2009, **11**, 5050–5053
- (12) H. X. Song, Z. Y. Tian, J. C. Xiao and C. P. Zhang, *Chem. - A Eur. J.*, 2020, **26**, 16261–16265.
- (13) Y. Ogiwara, S. Hosaka and N. Sakai, *Organometallics*, 2020, **39**, 856–861.
- (14) S. B. Munoz, H. Dang, X. Ispizua-Rodriguez, T. Mathew and G. K. S. Prakash, *Org. Lett.*, 2019, **21**, 1659–1663.
- (15) Z. Wang, X. Wang and Y. Nishihara, *Chem. Commun.*, 2018, **54**, 13969–13972.
- (16) Commercially available from Chemieliva Pharmaceutical.

## 7. $^1\text{H}$ and $^{13}\text{C}$ NMR Spectra of Products

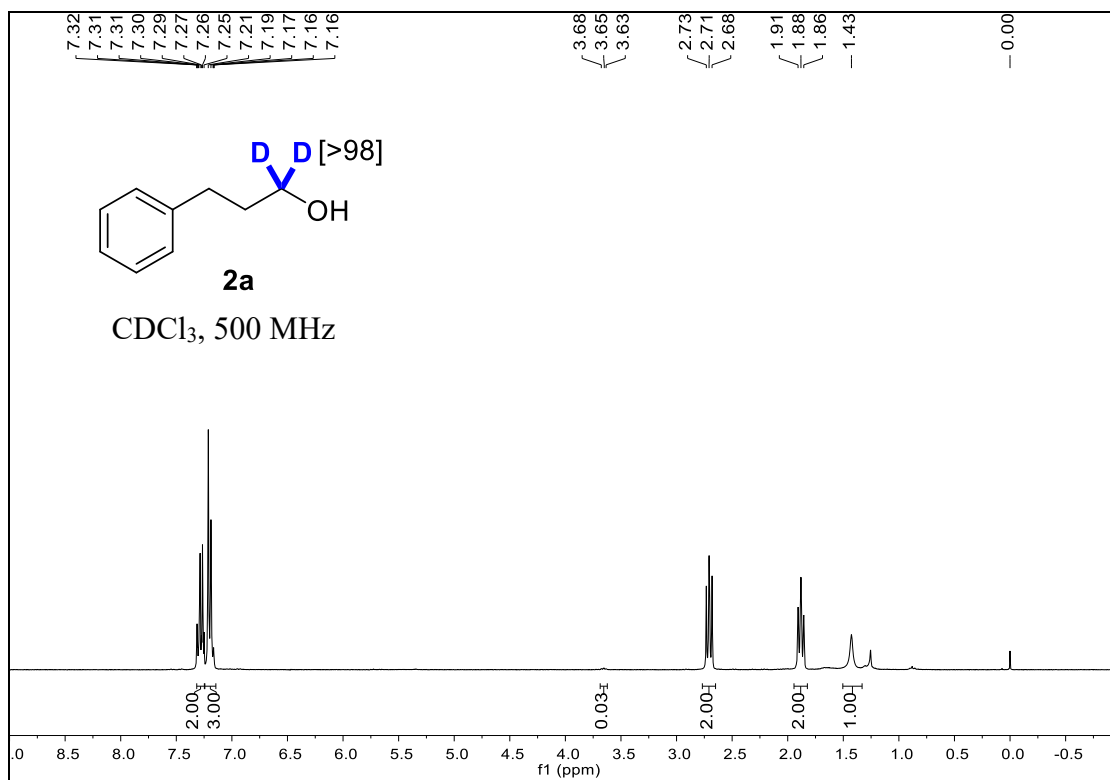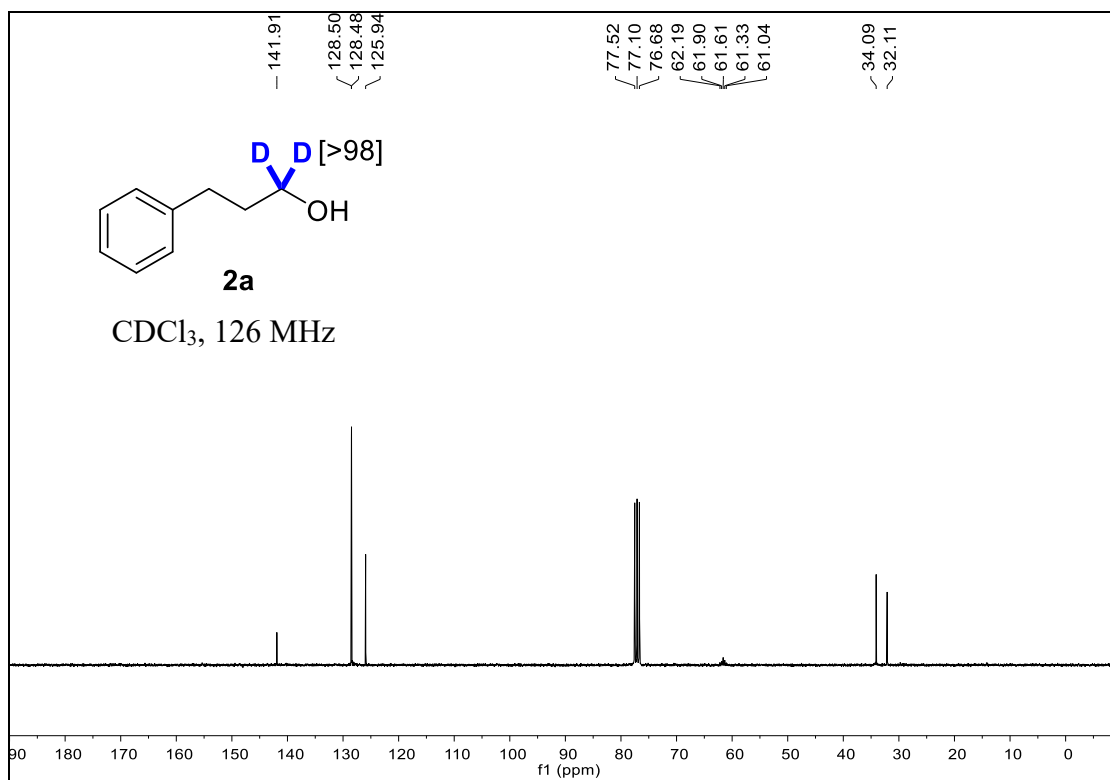

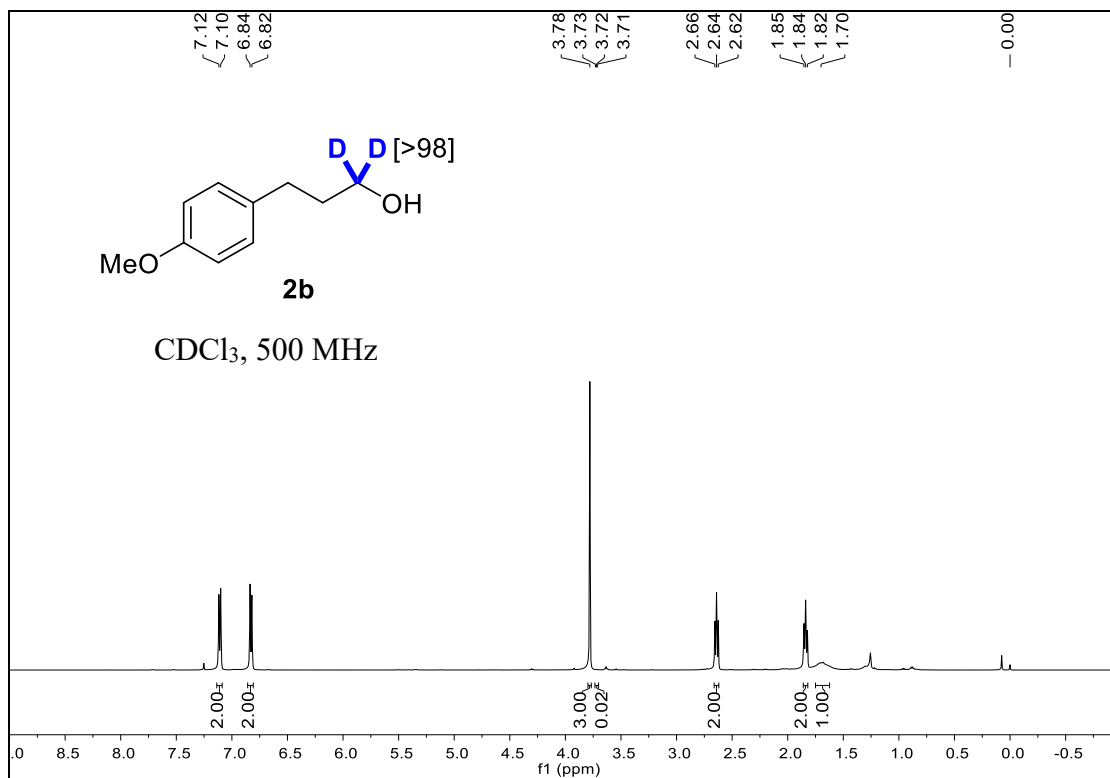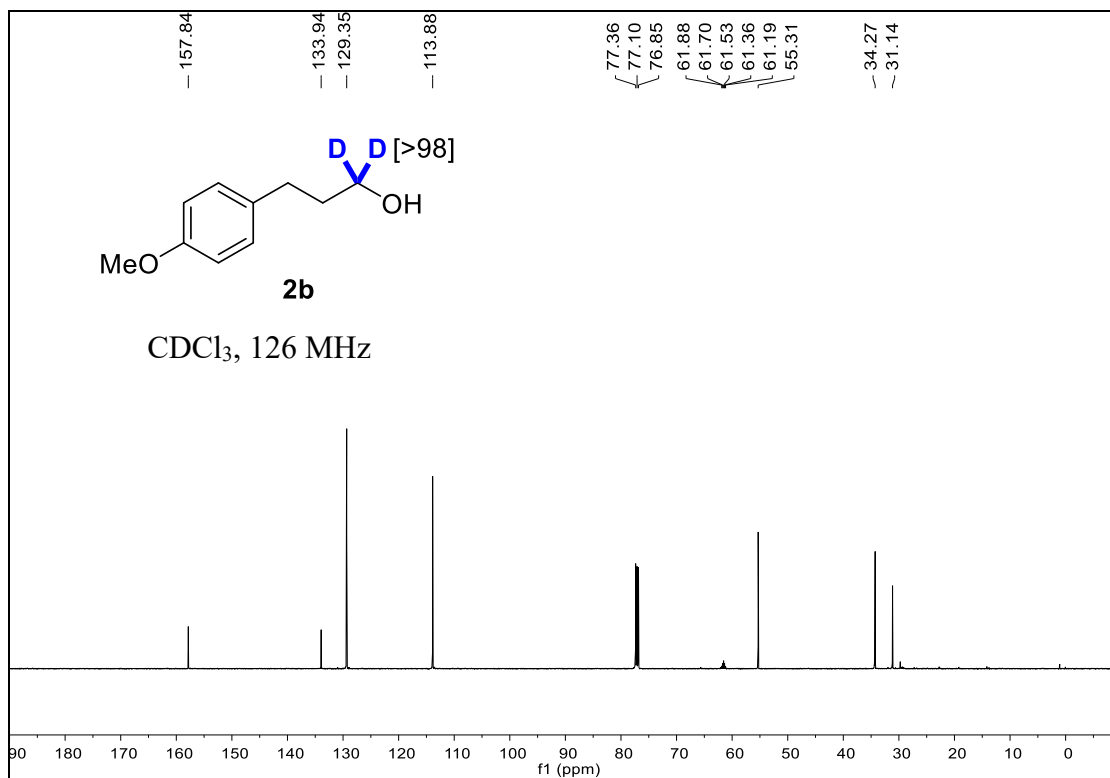

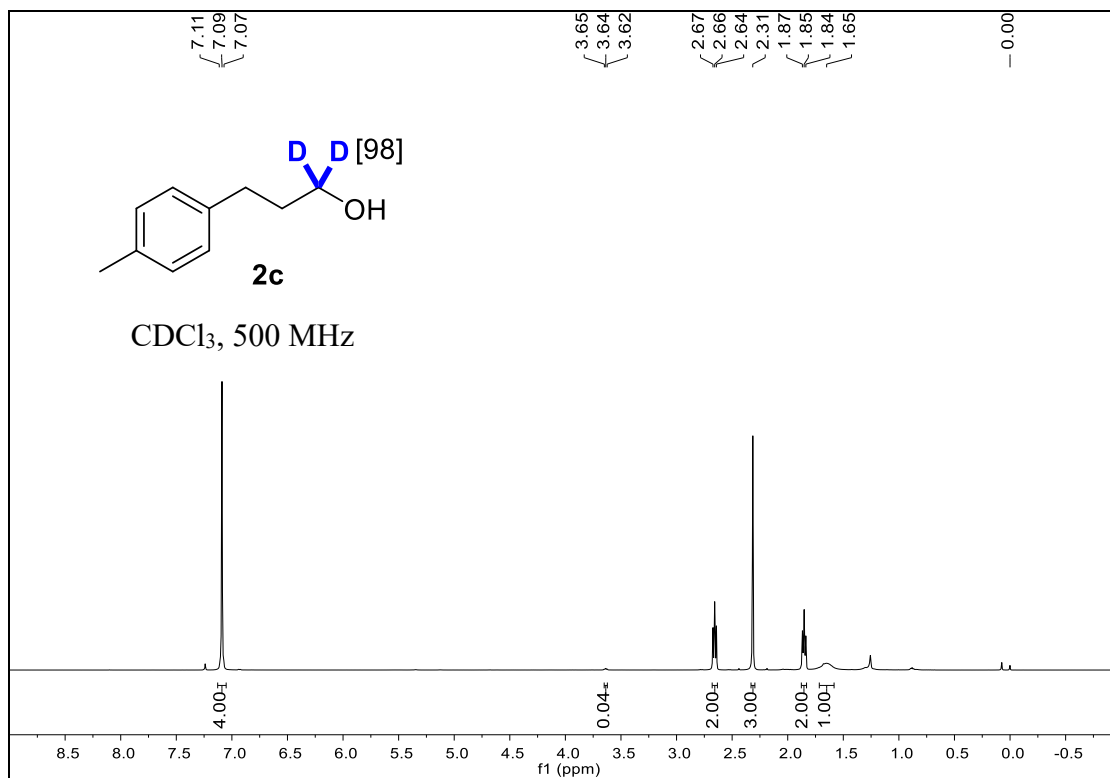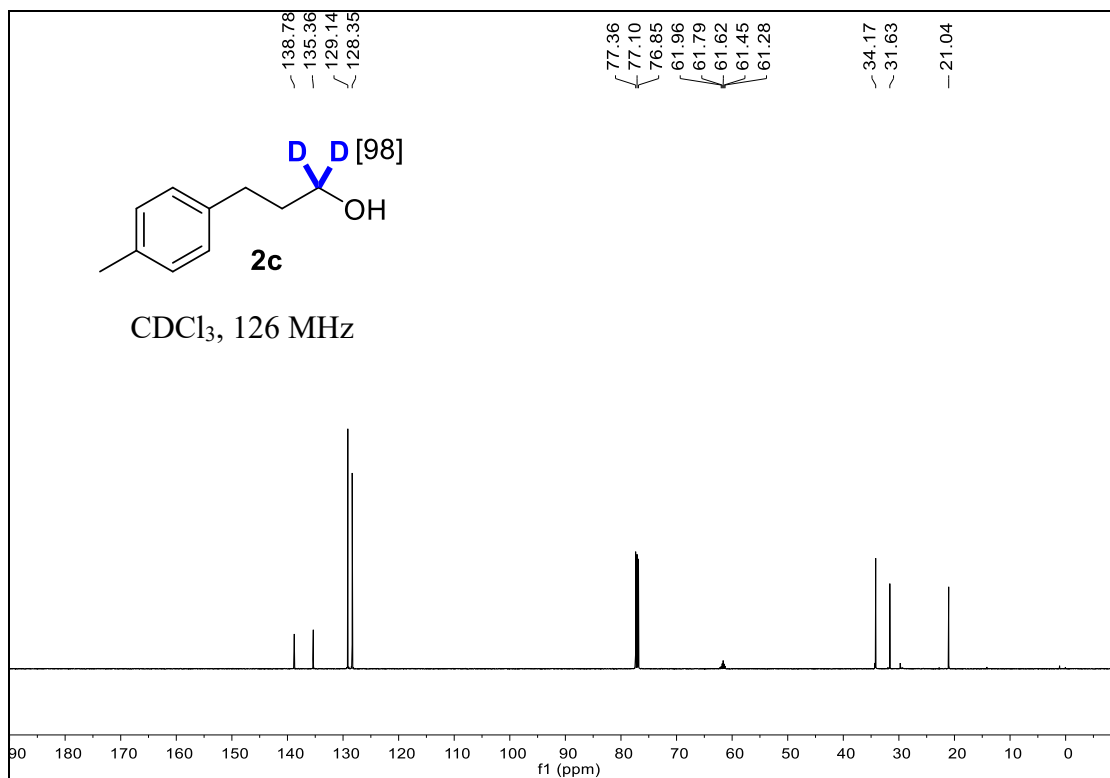

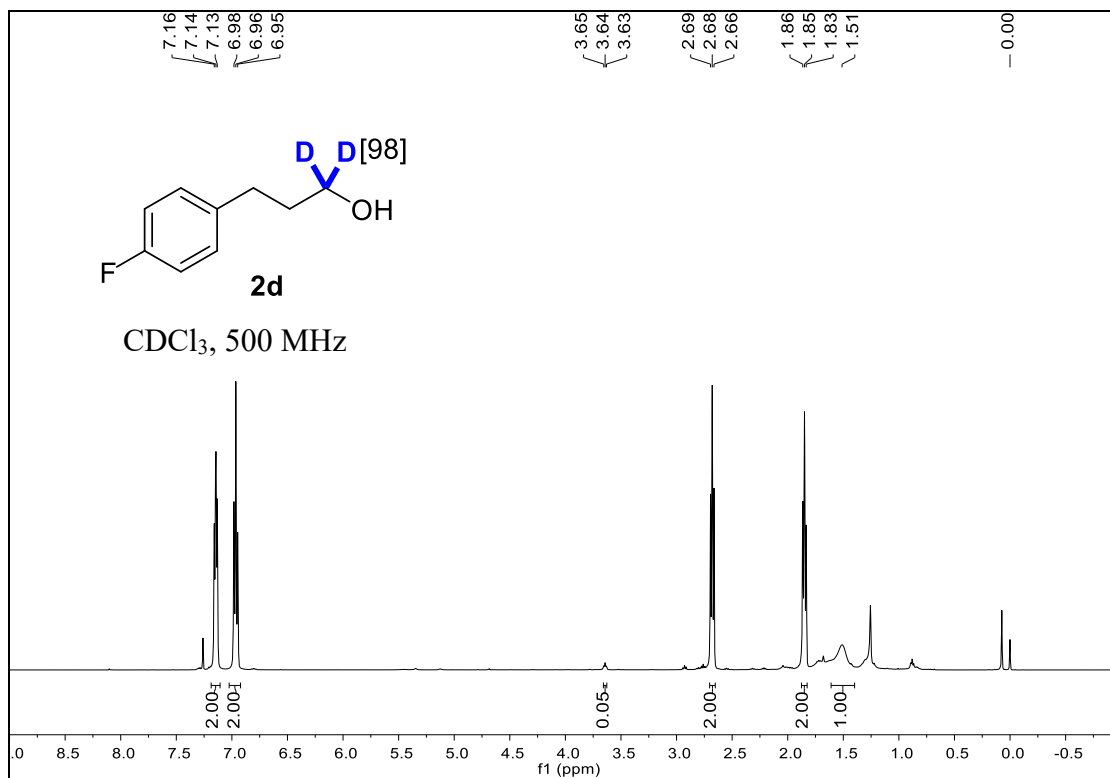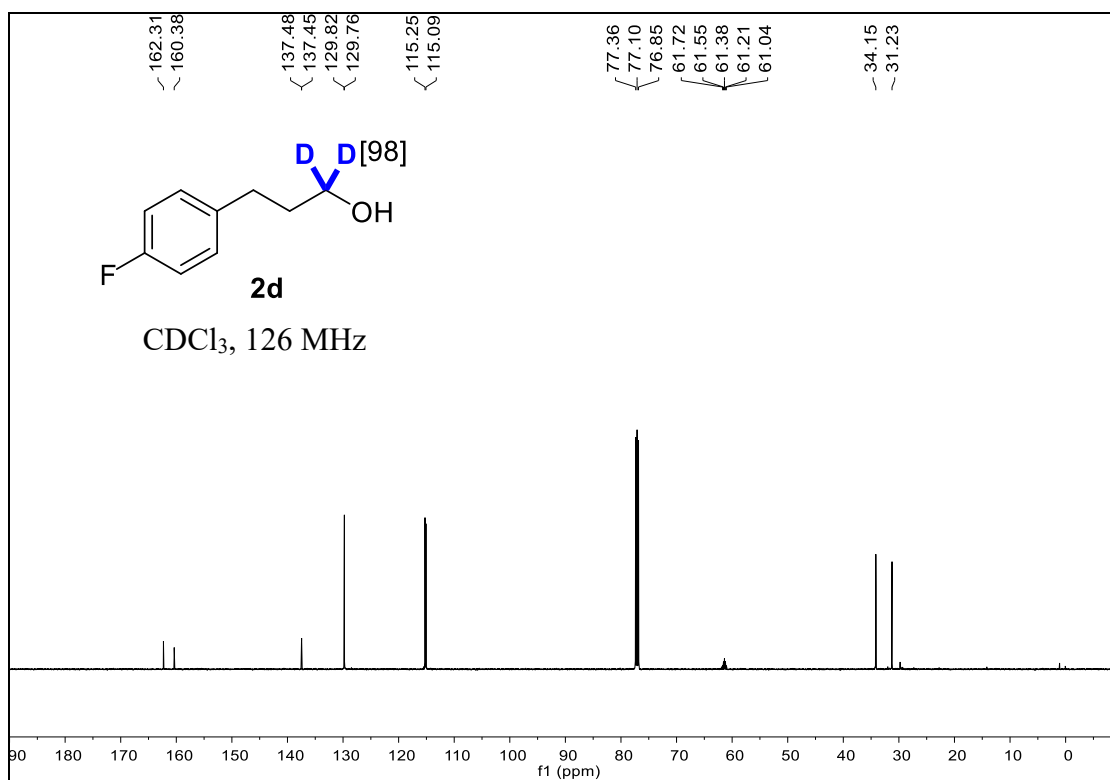

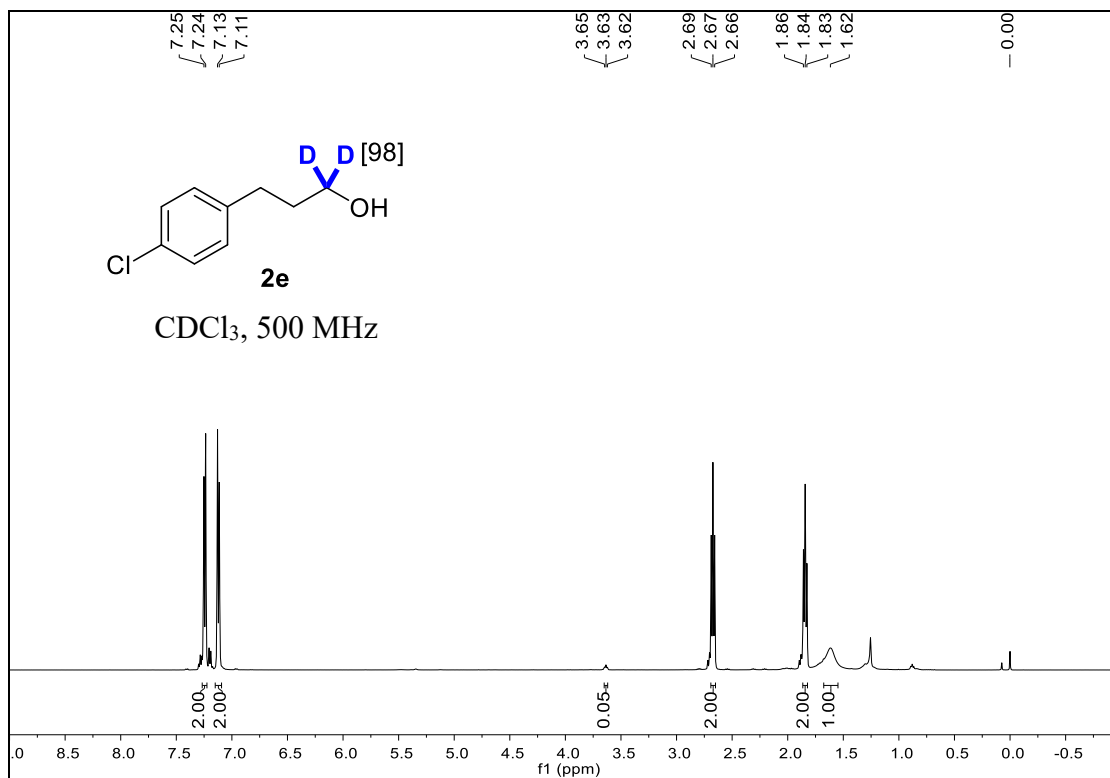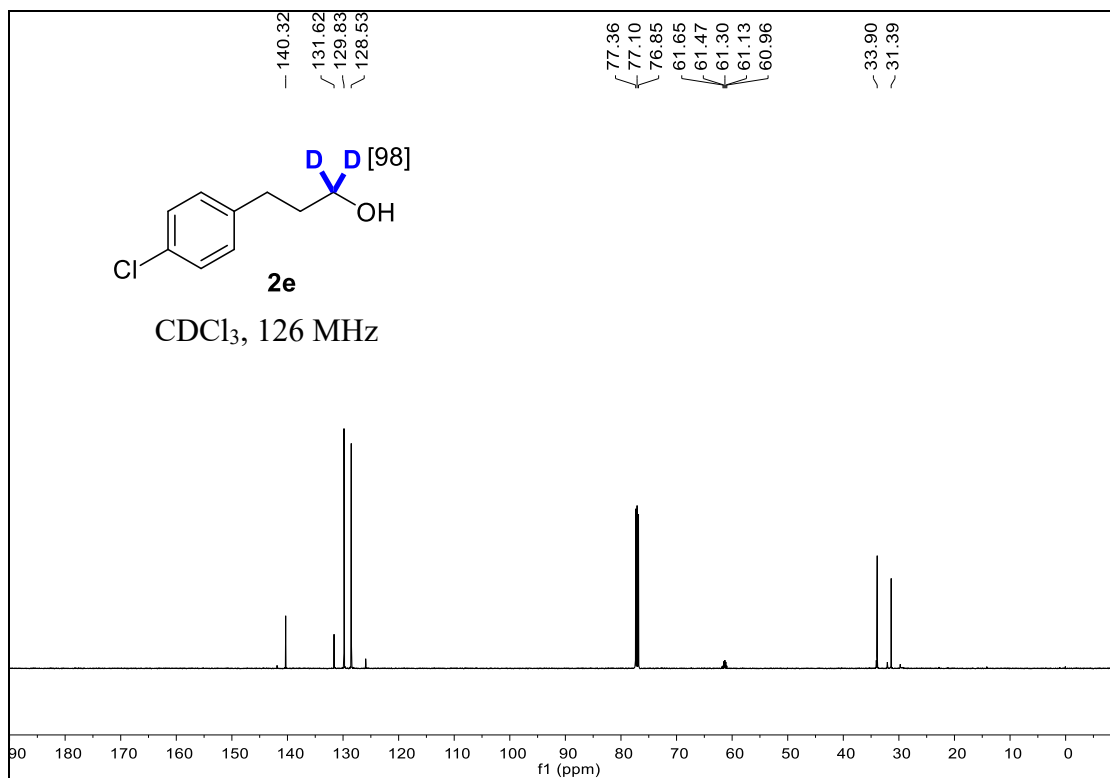

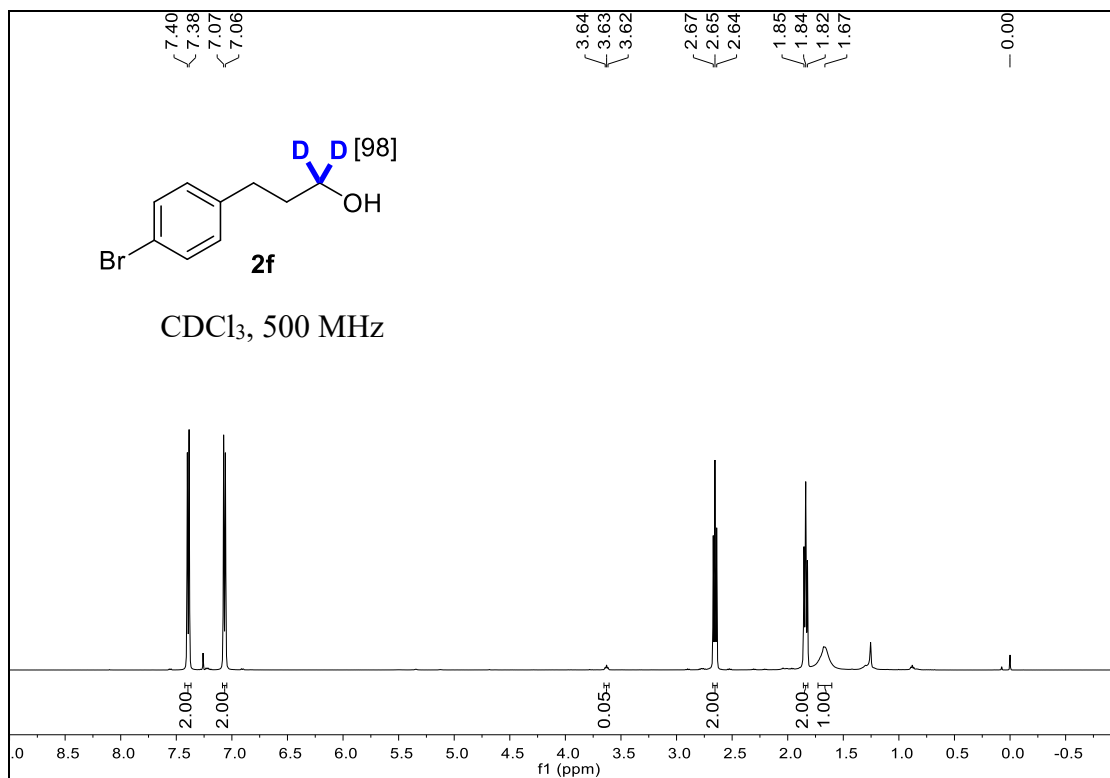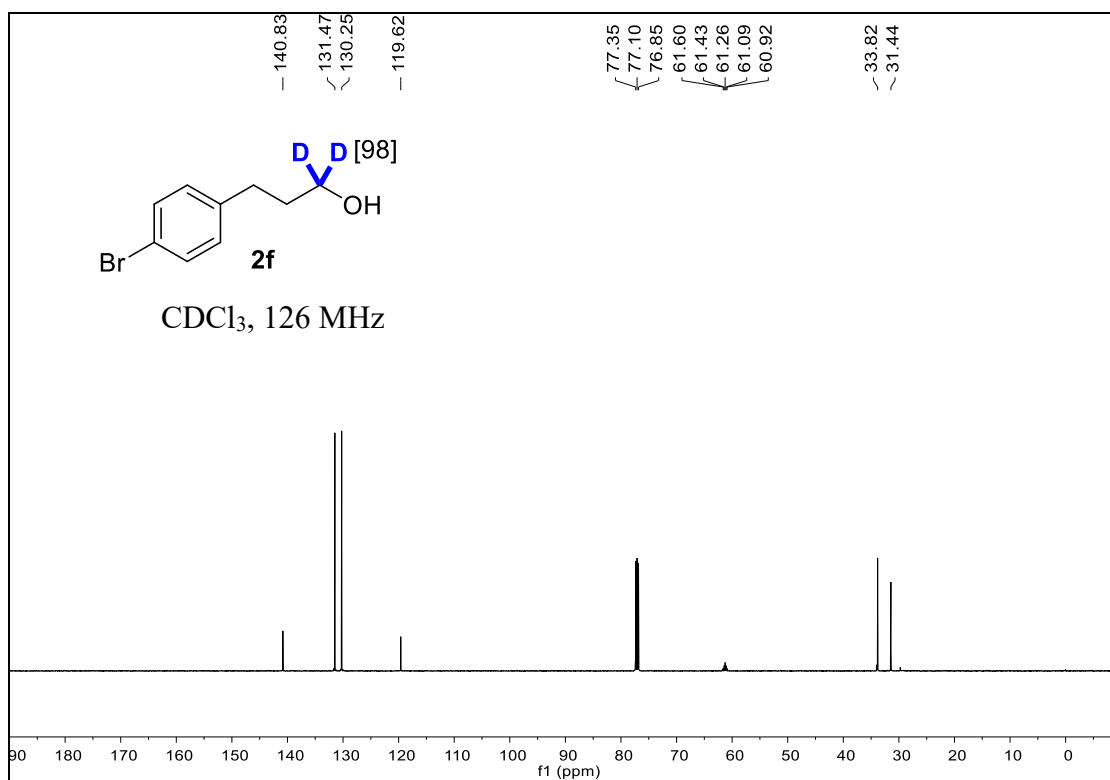

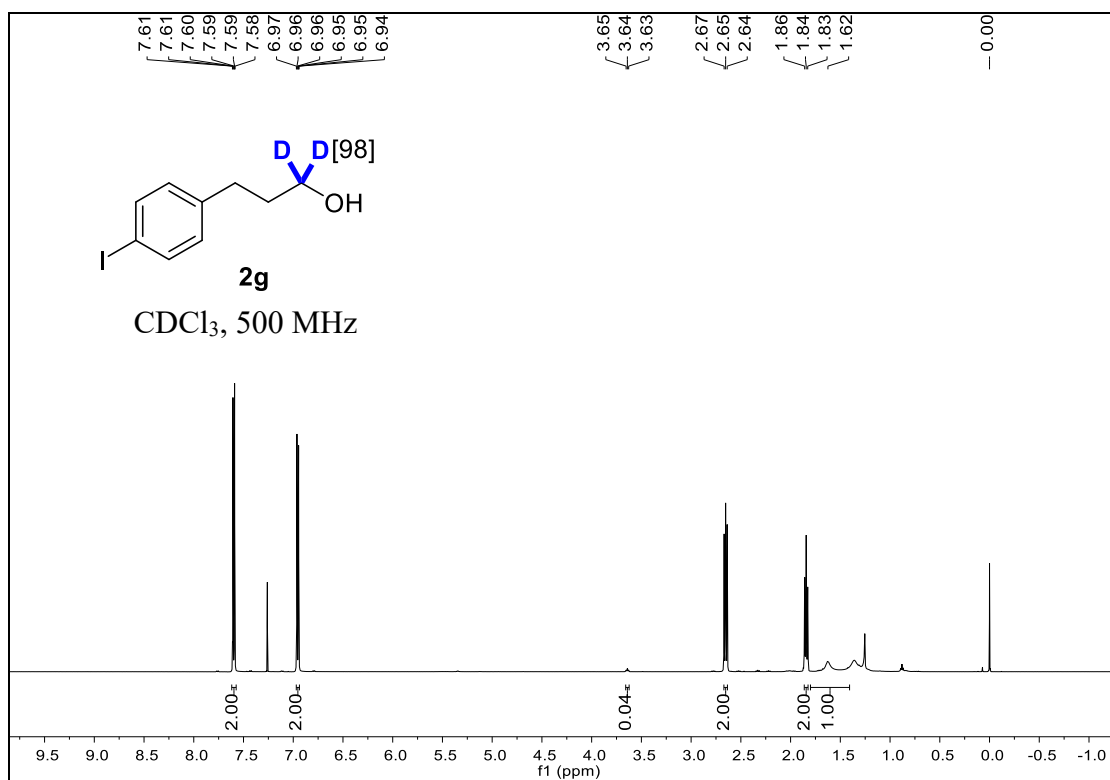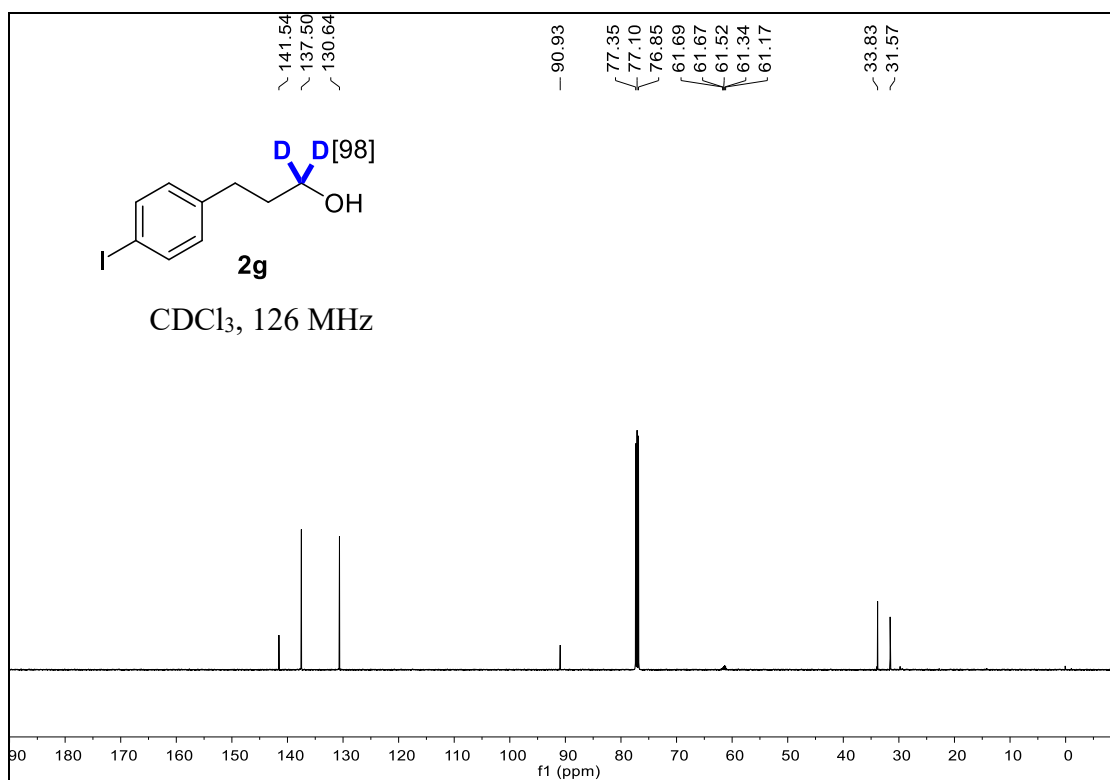



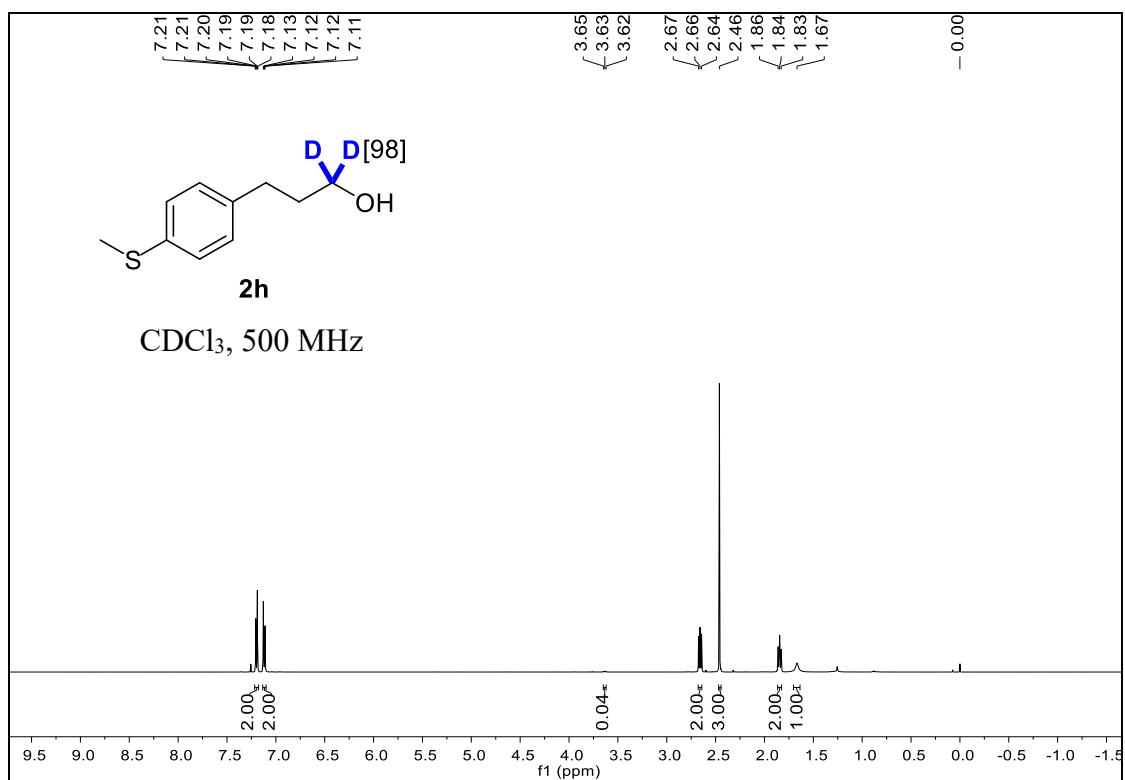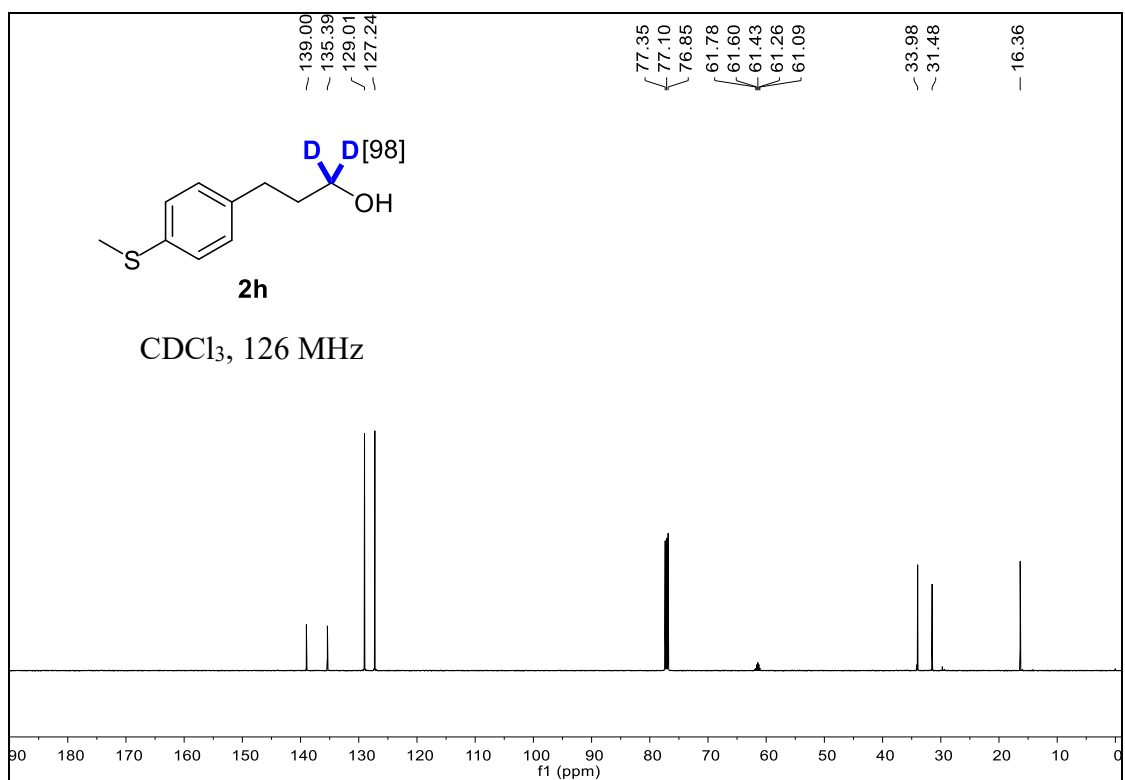

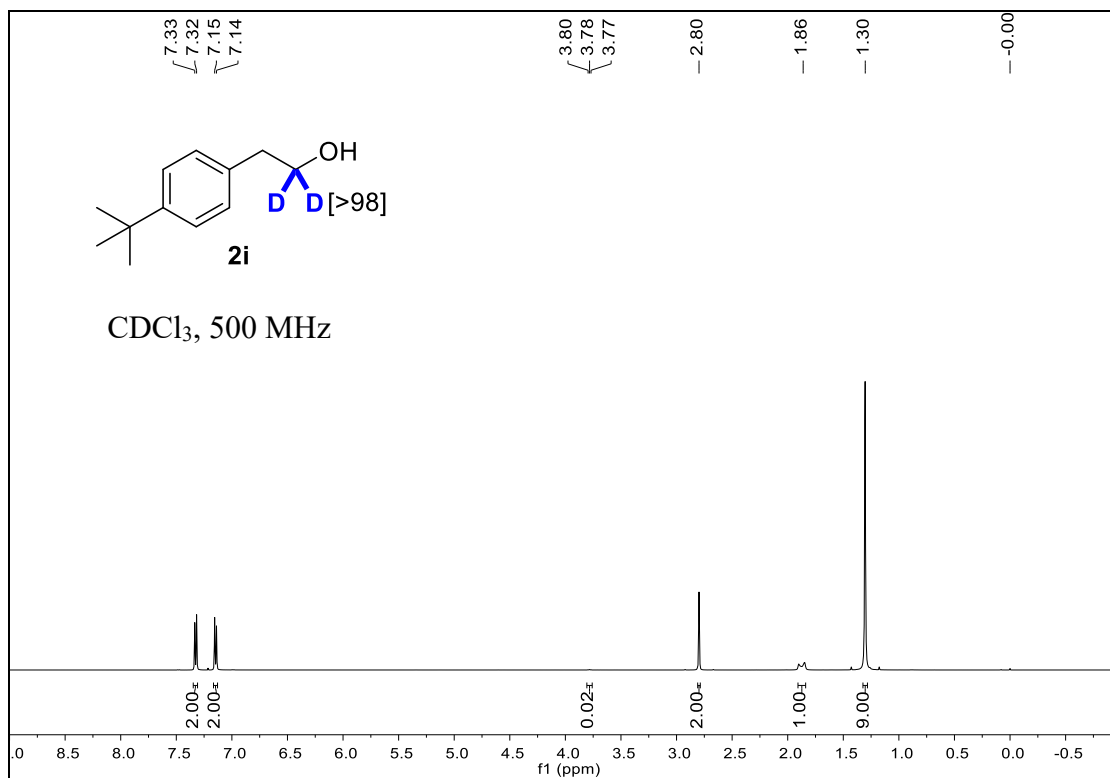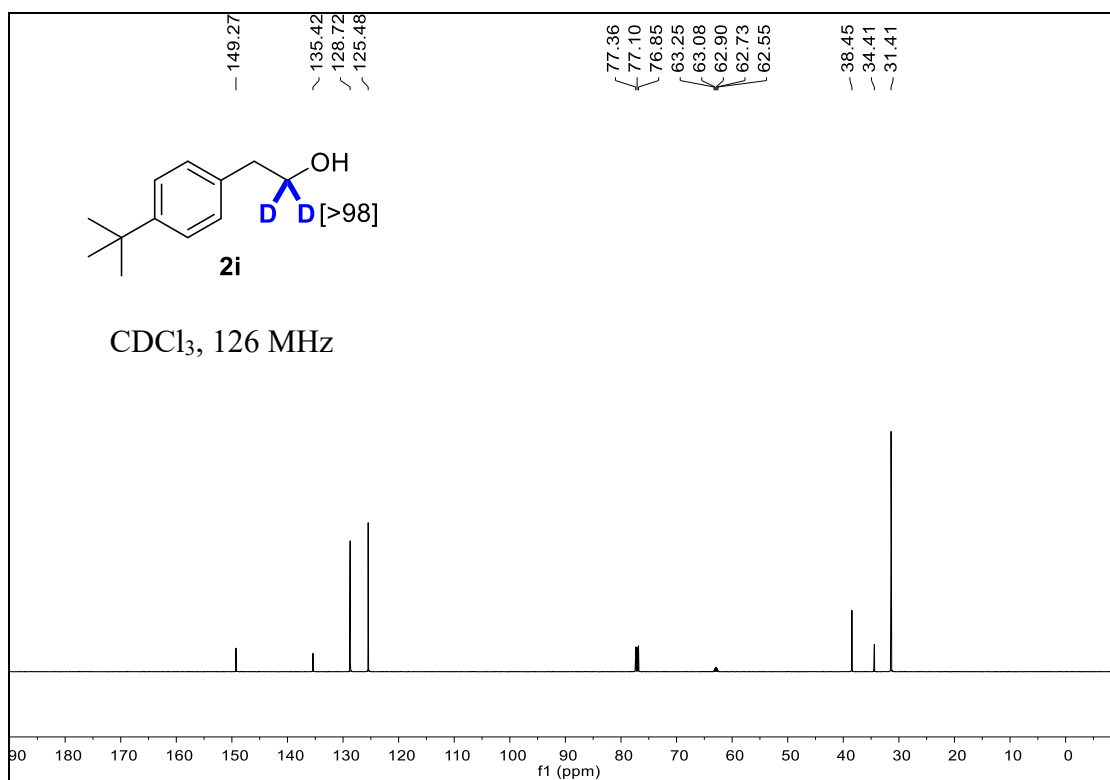

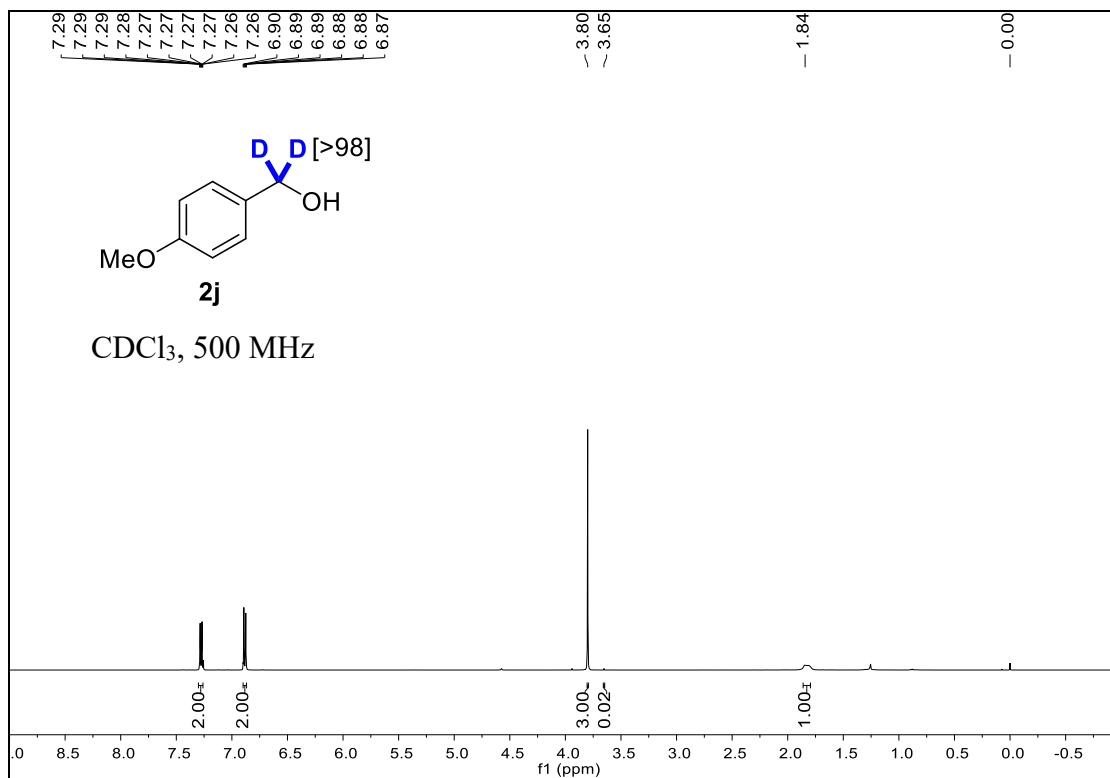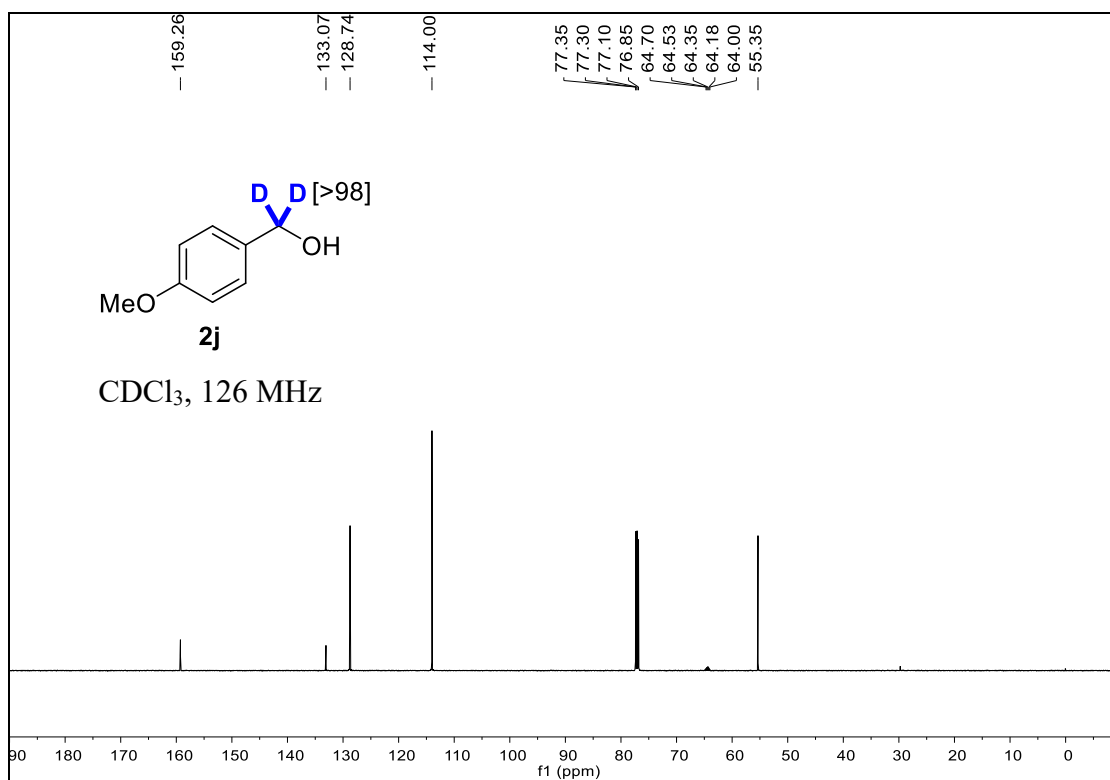

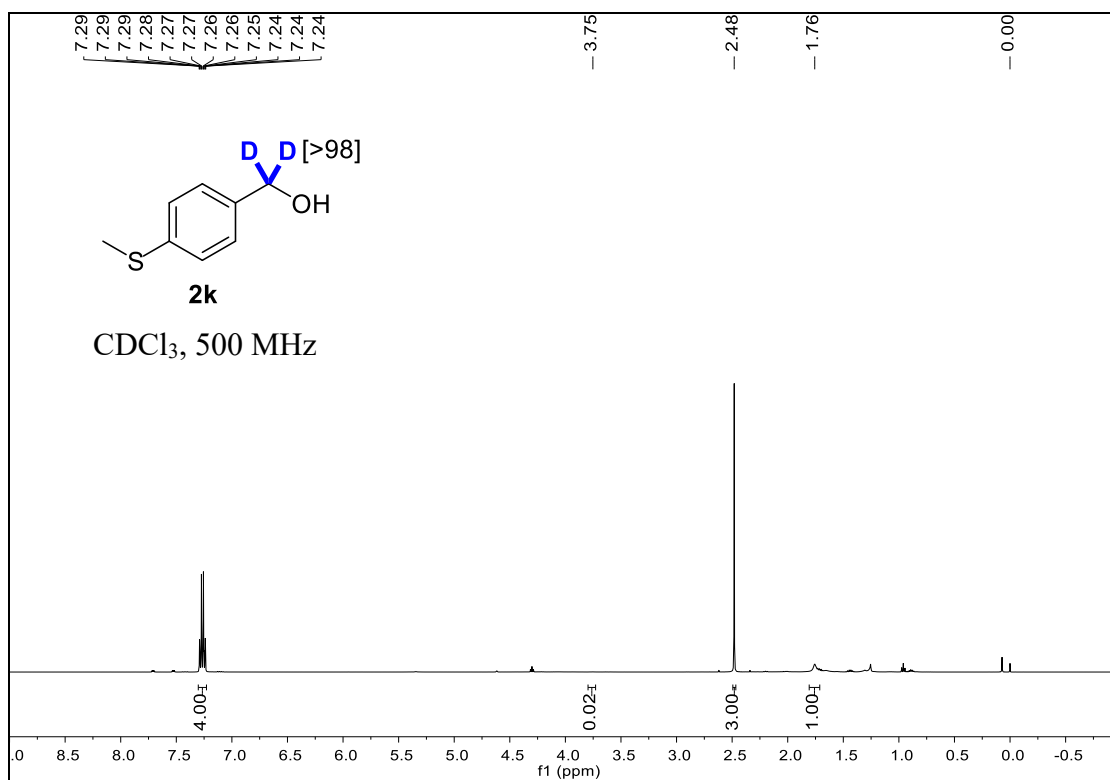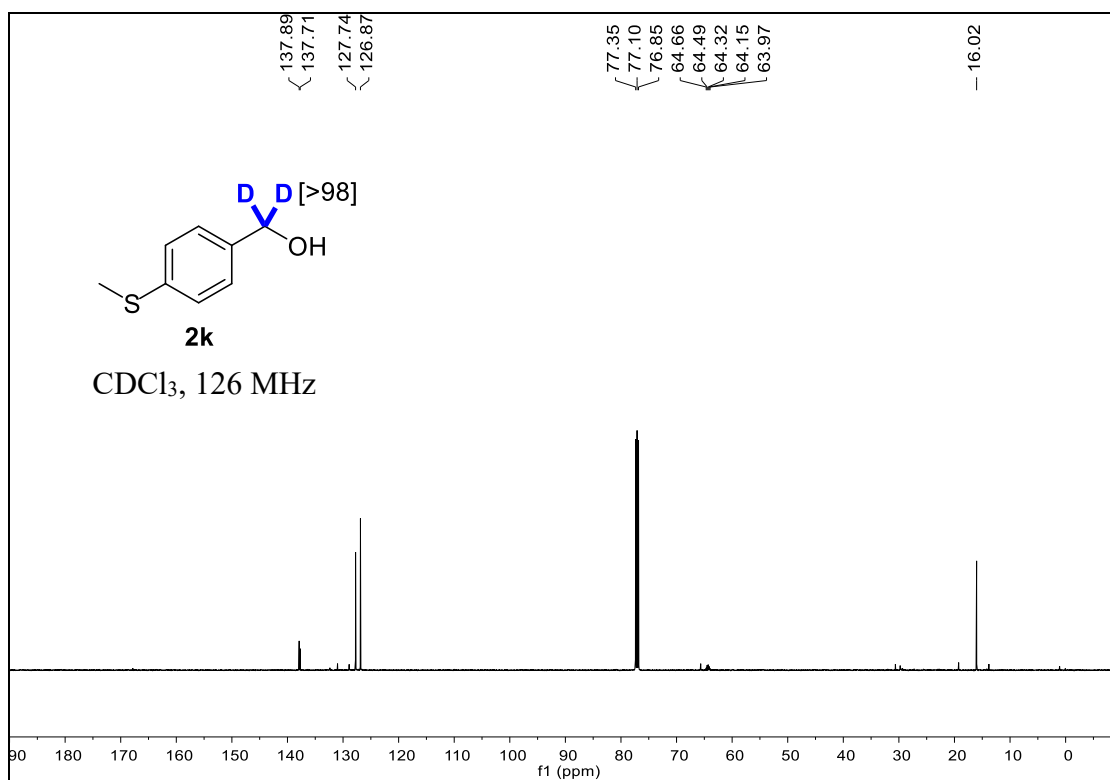

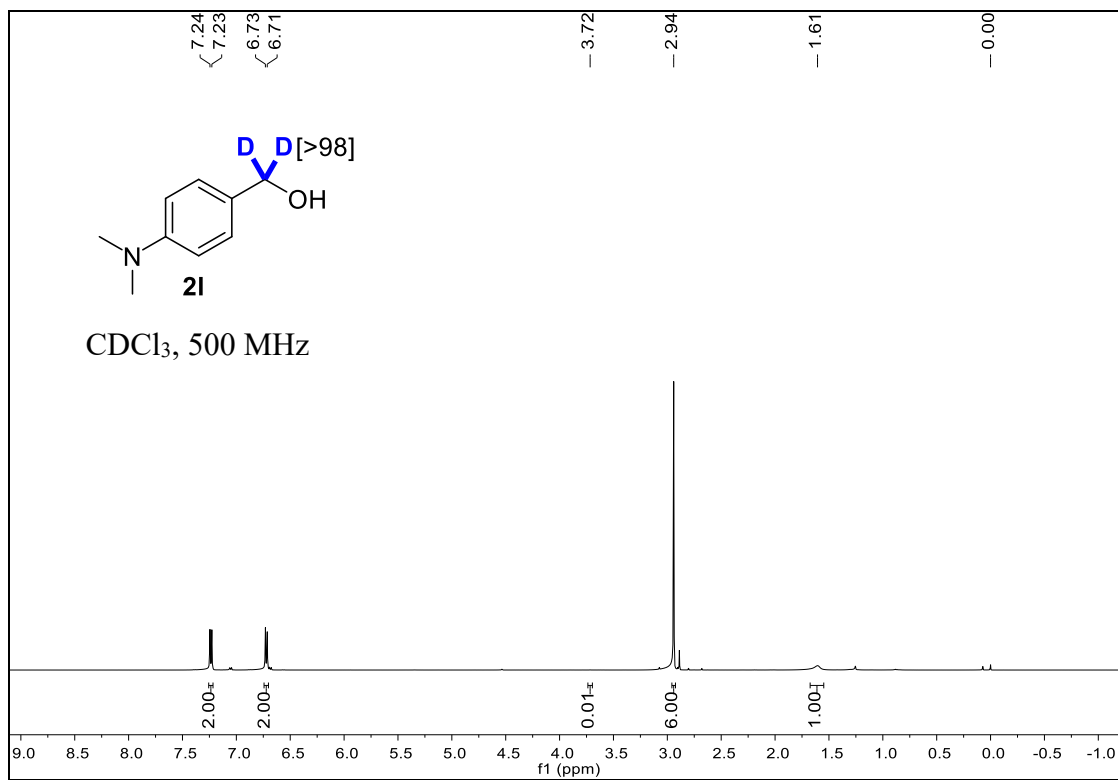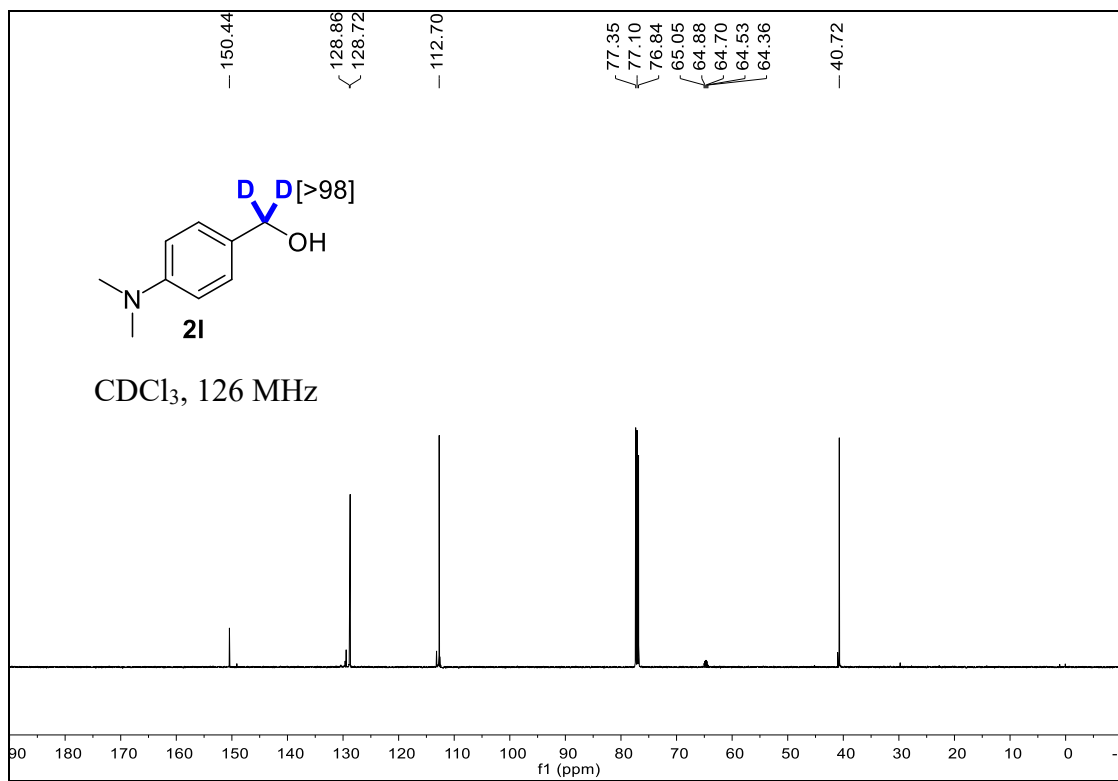

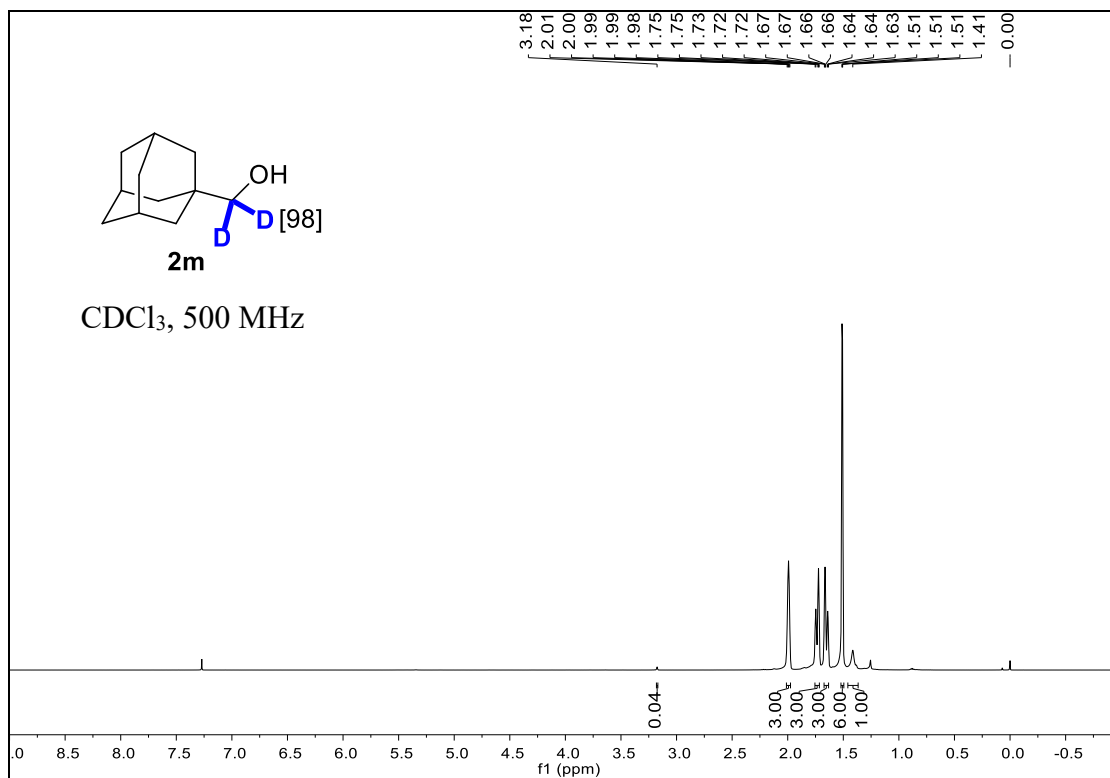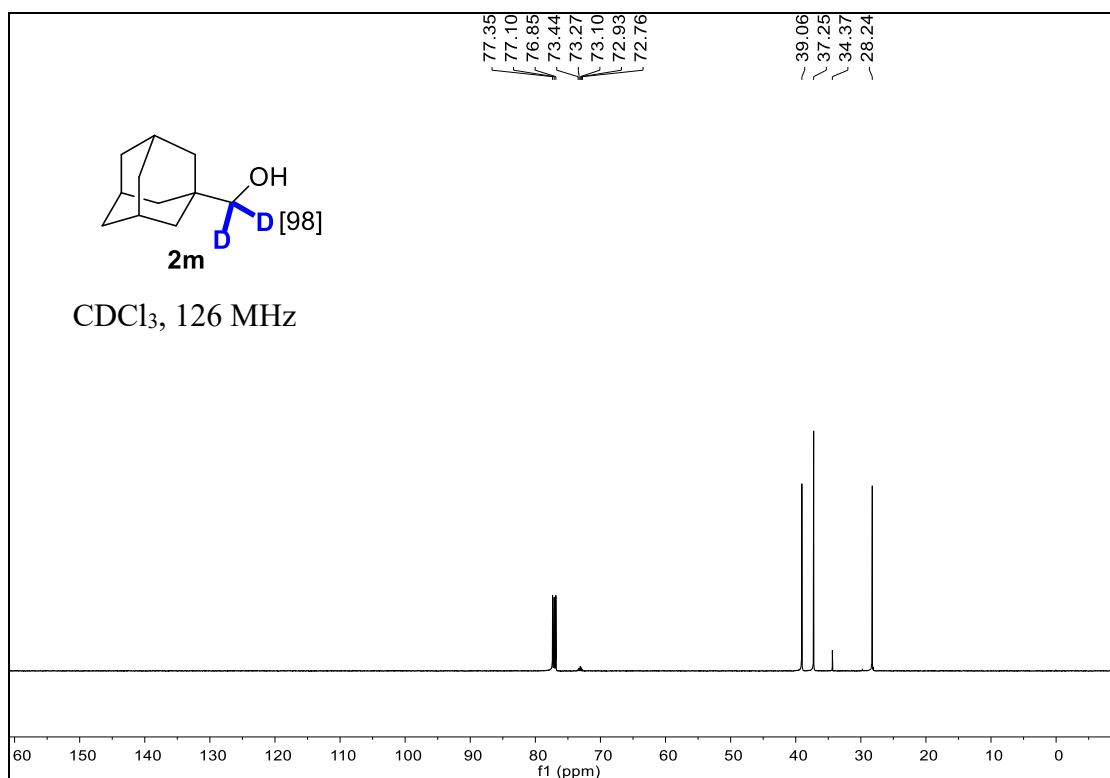

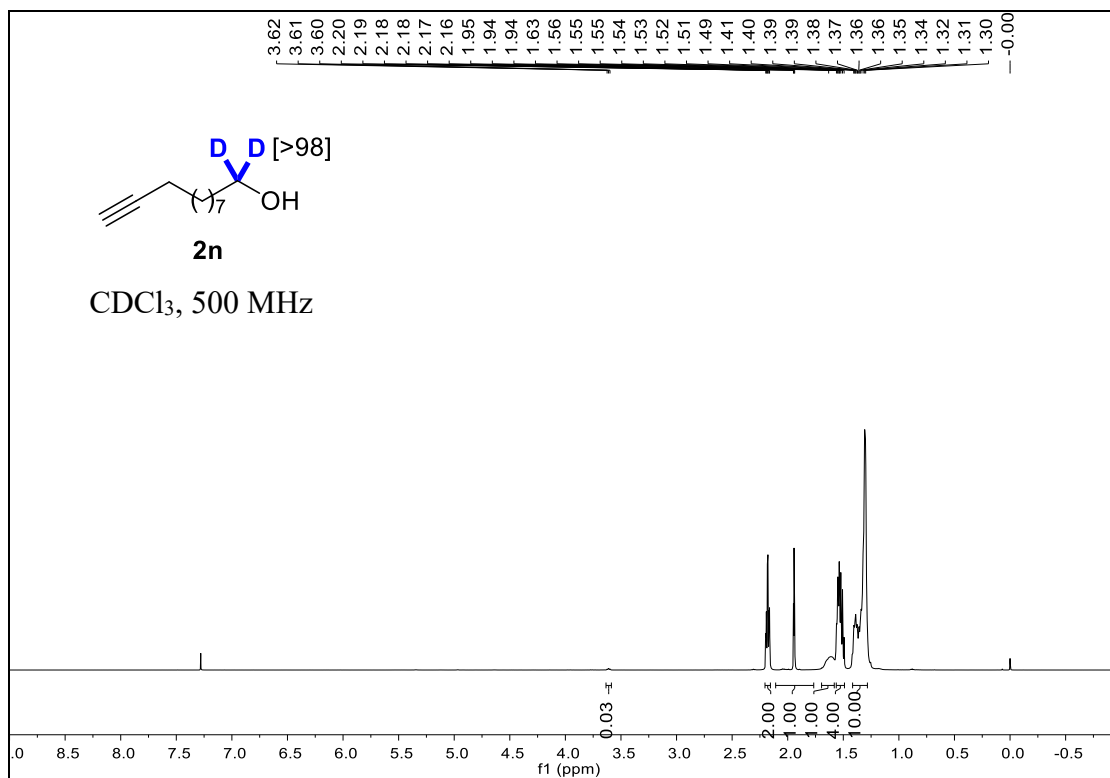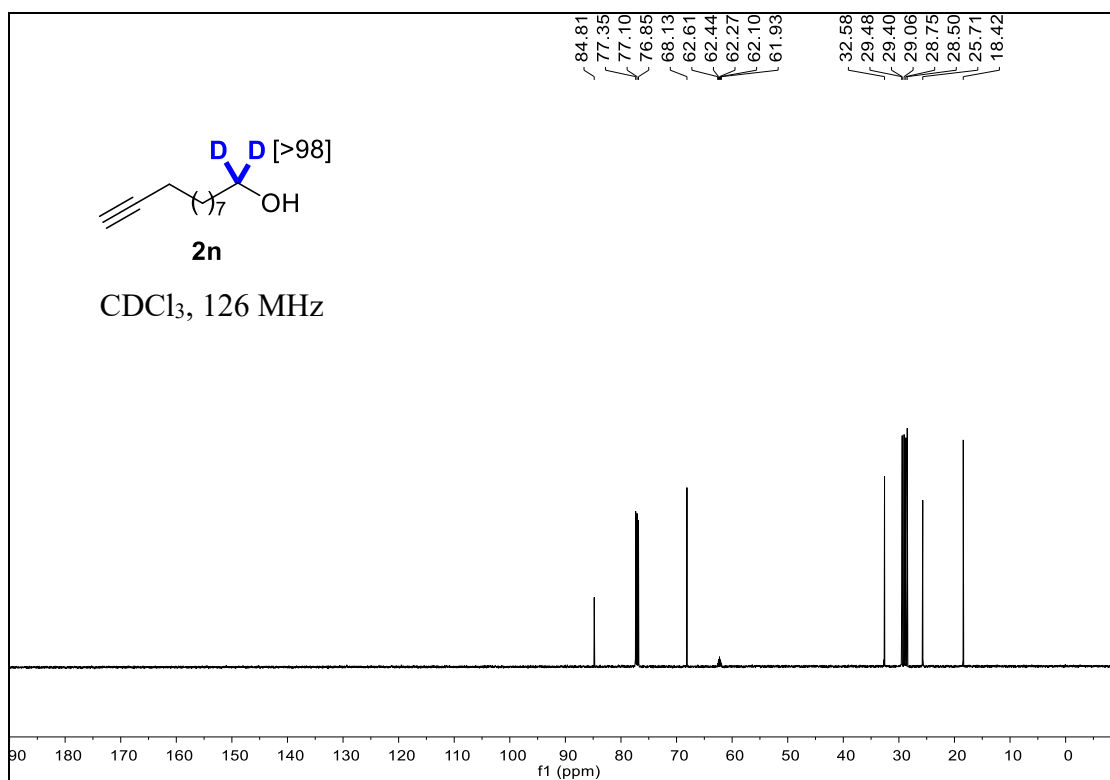

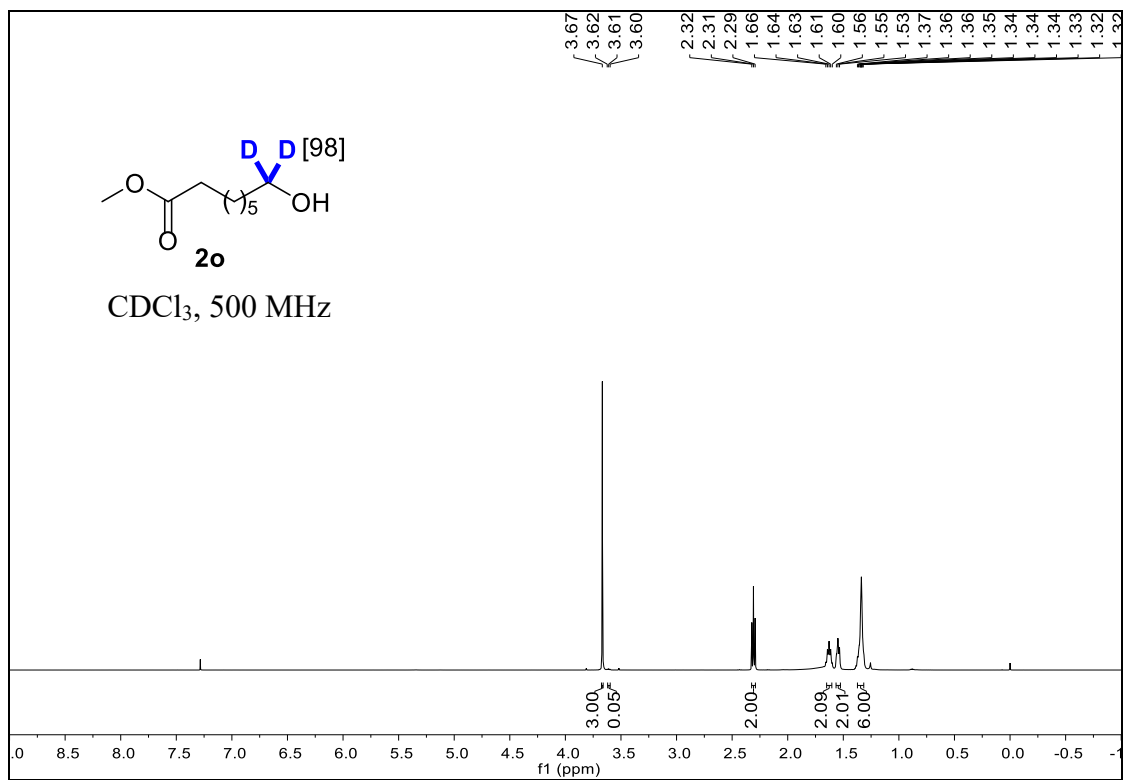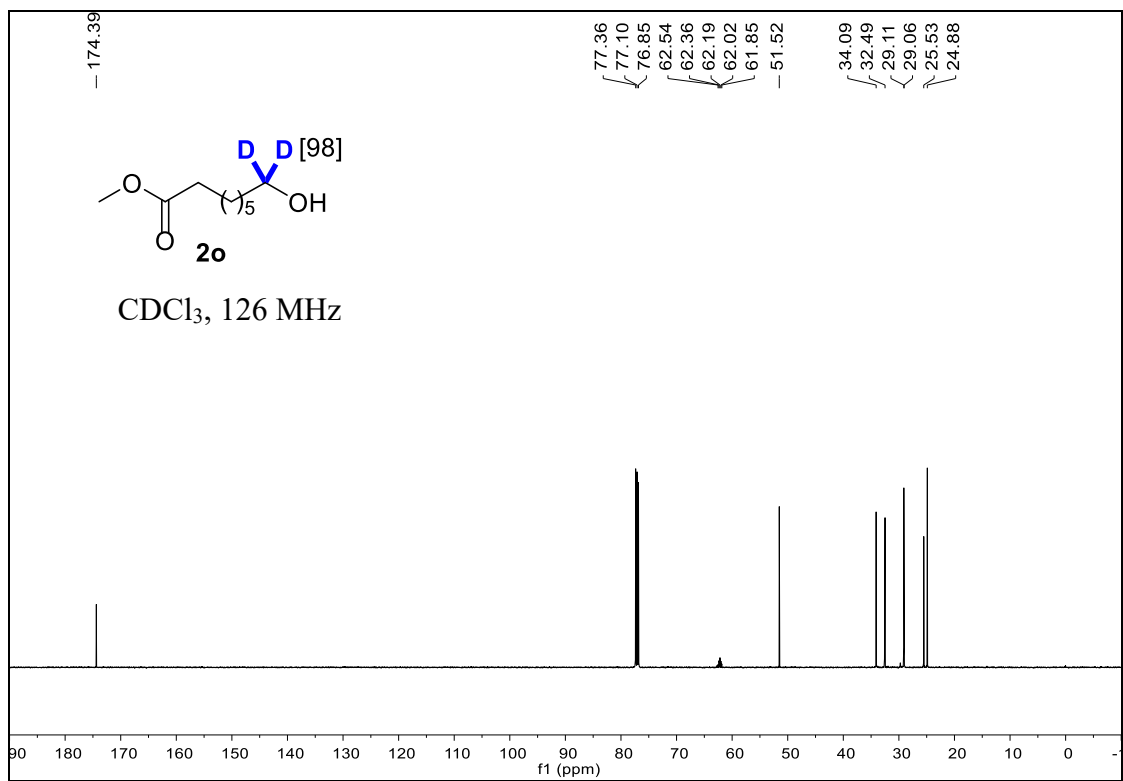



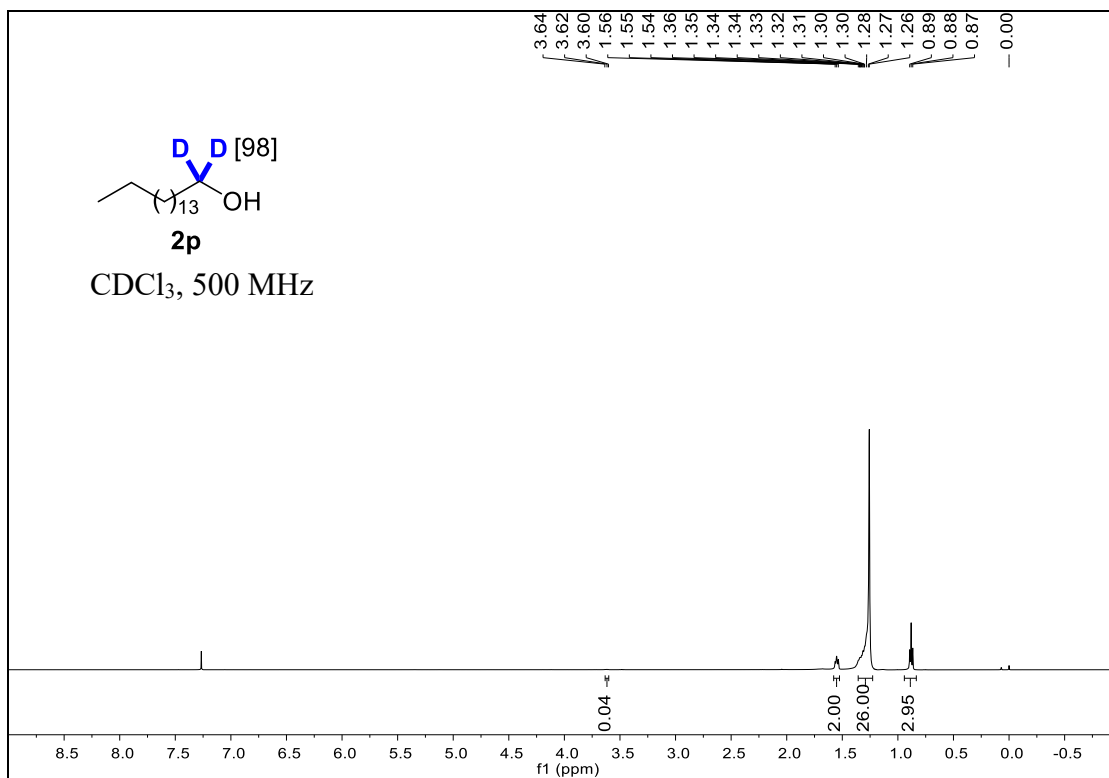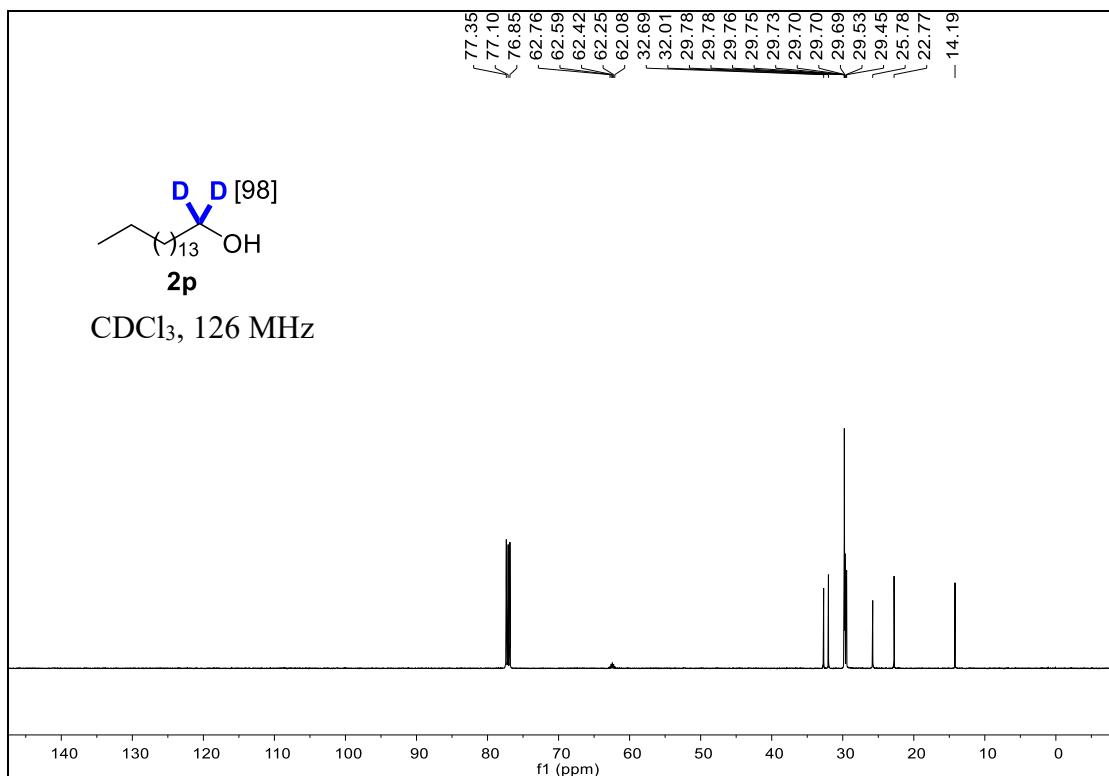

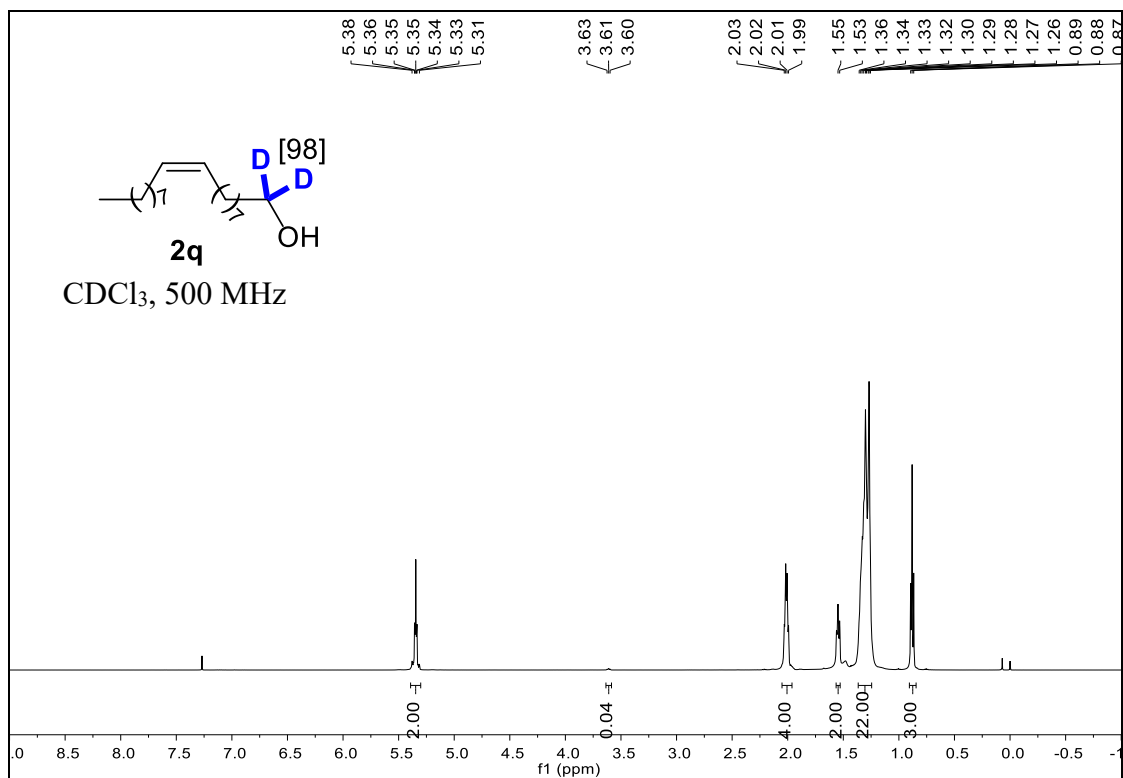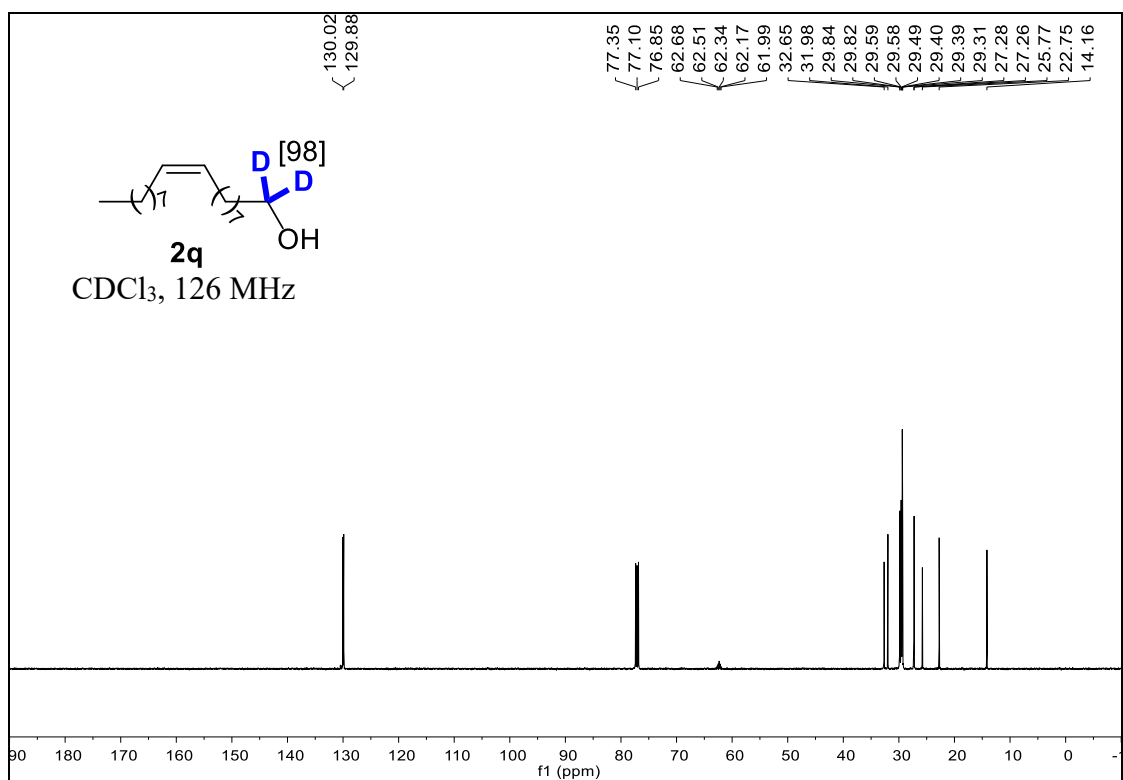

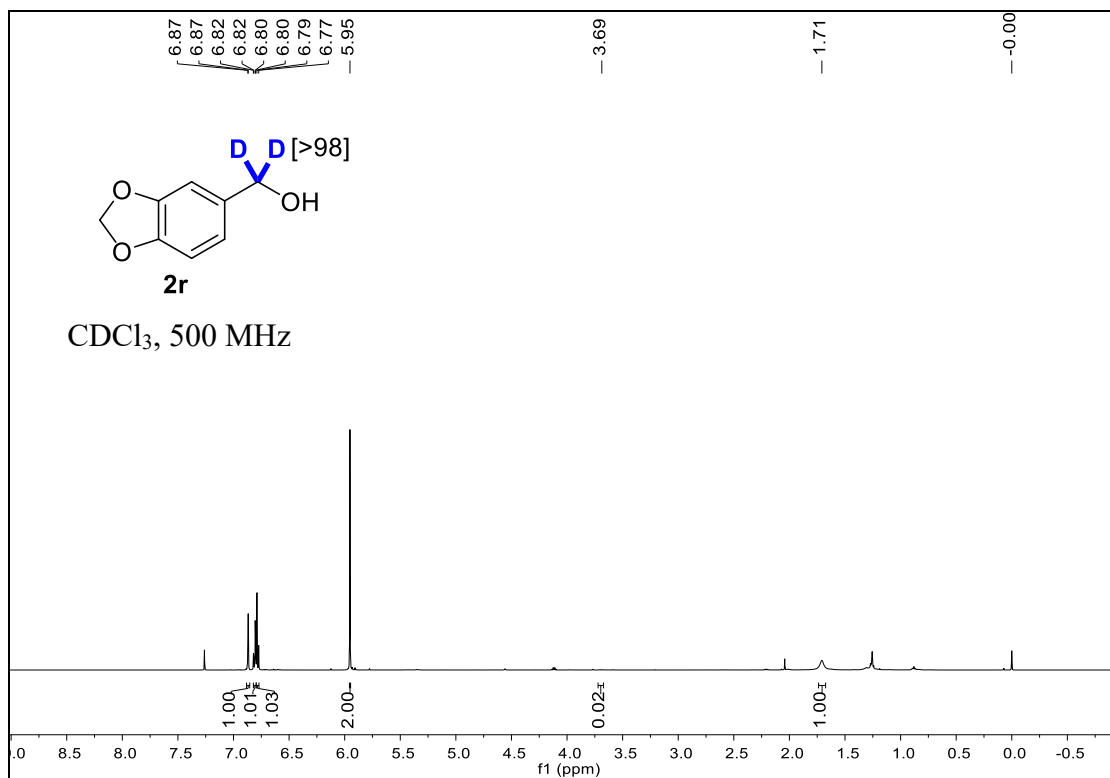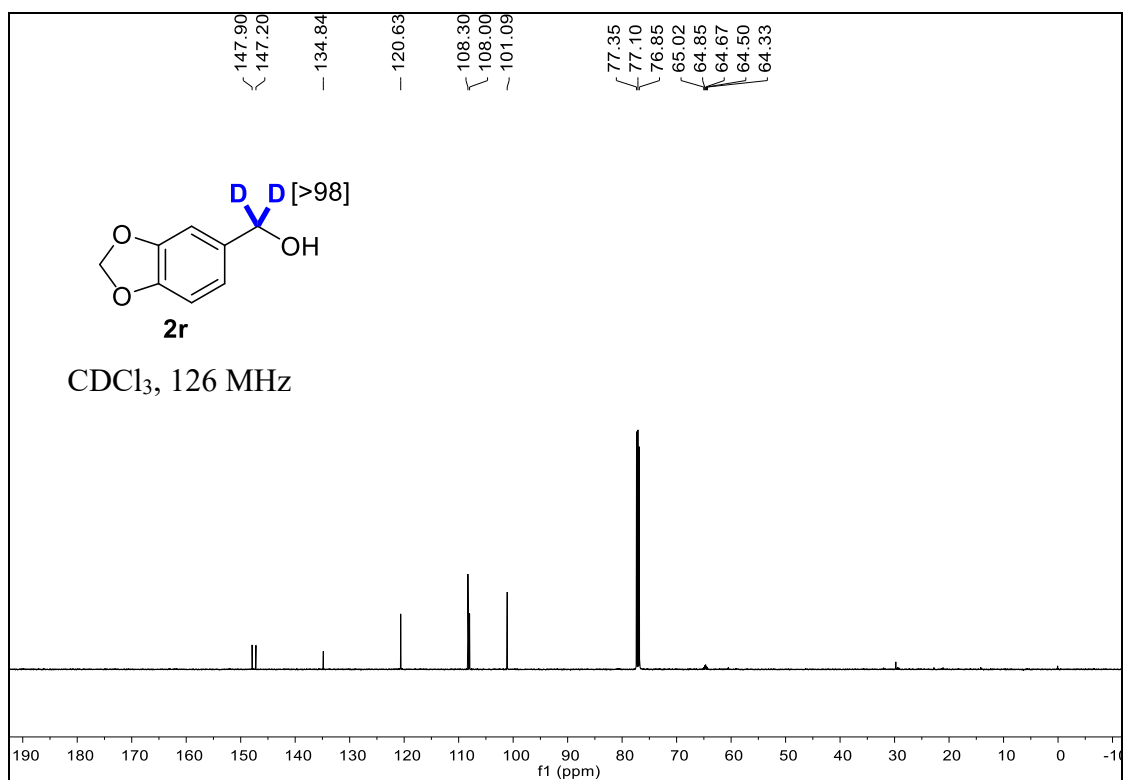

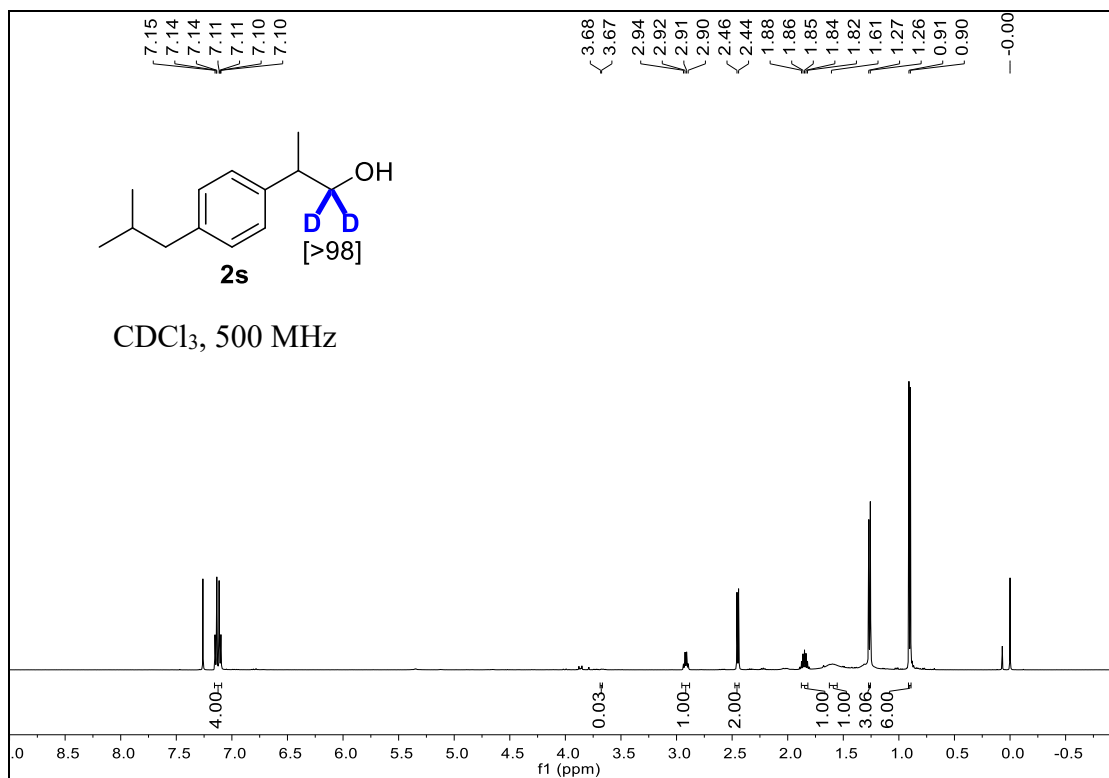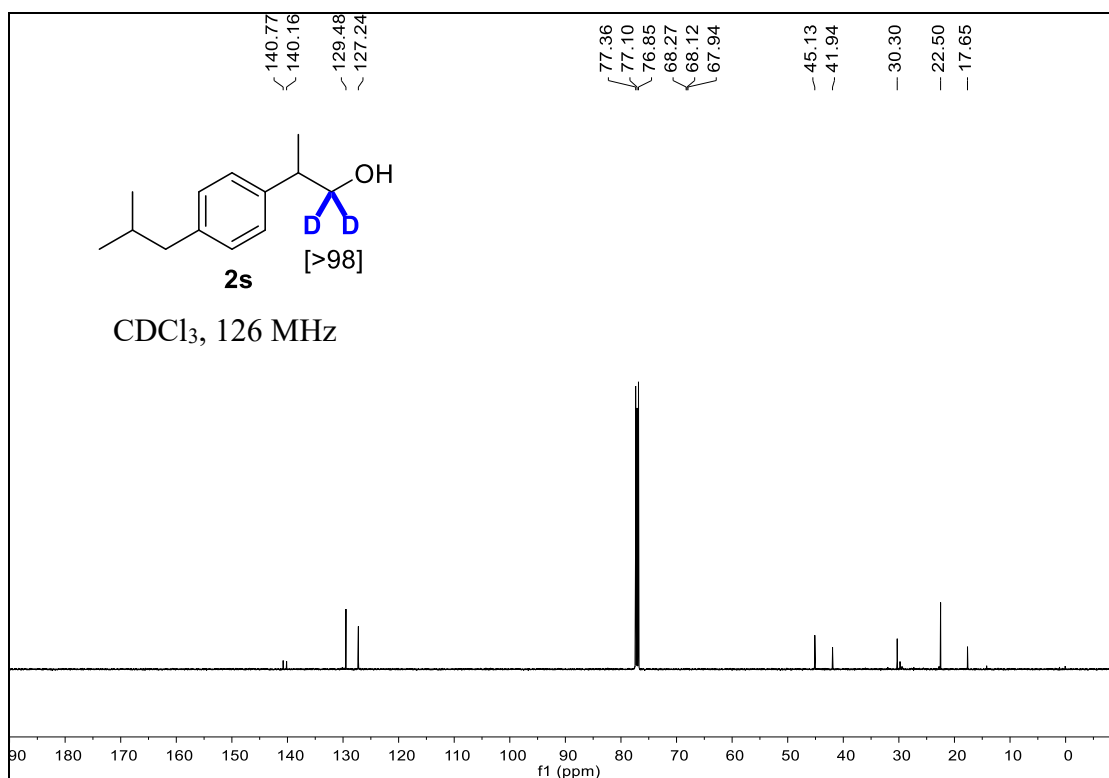

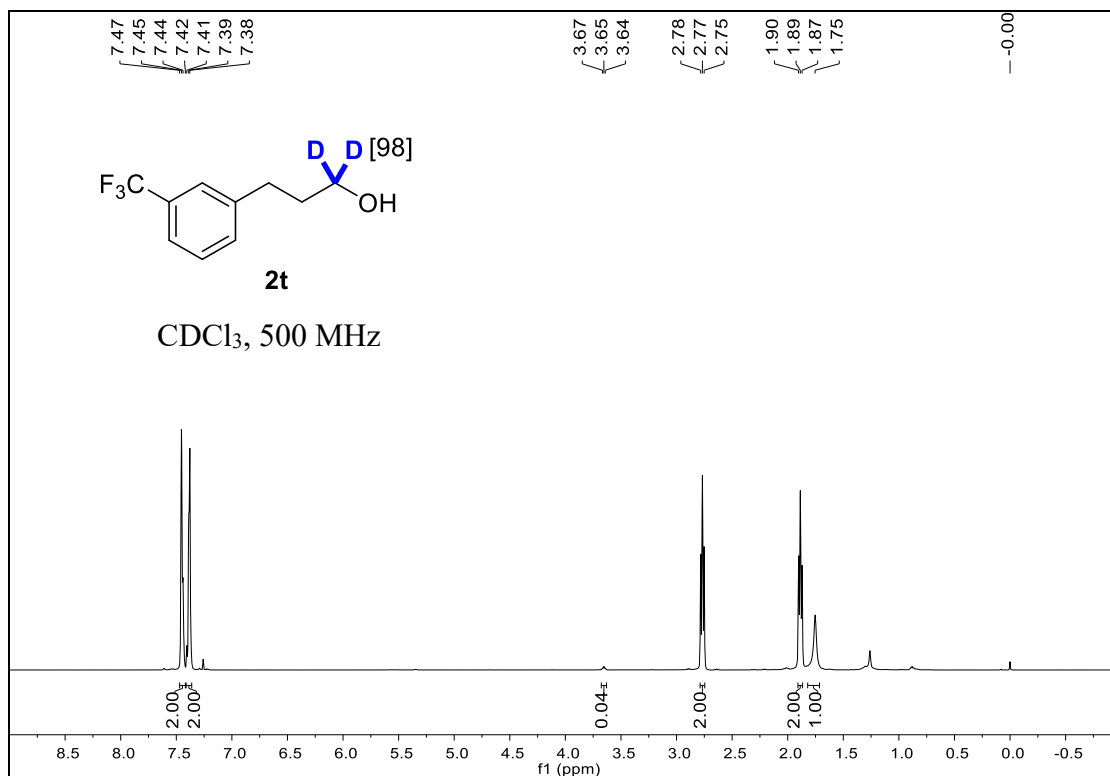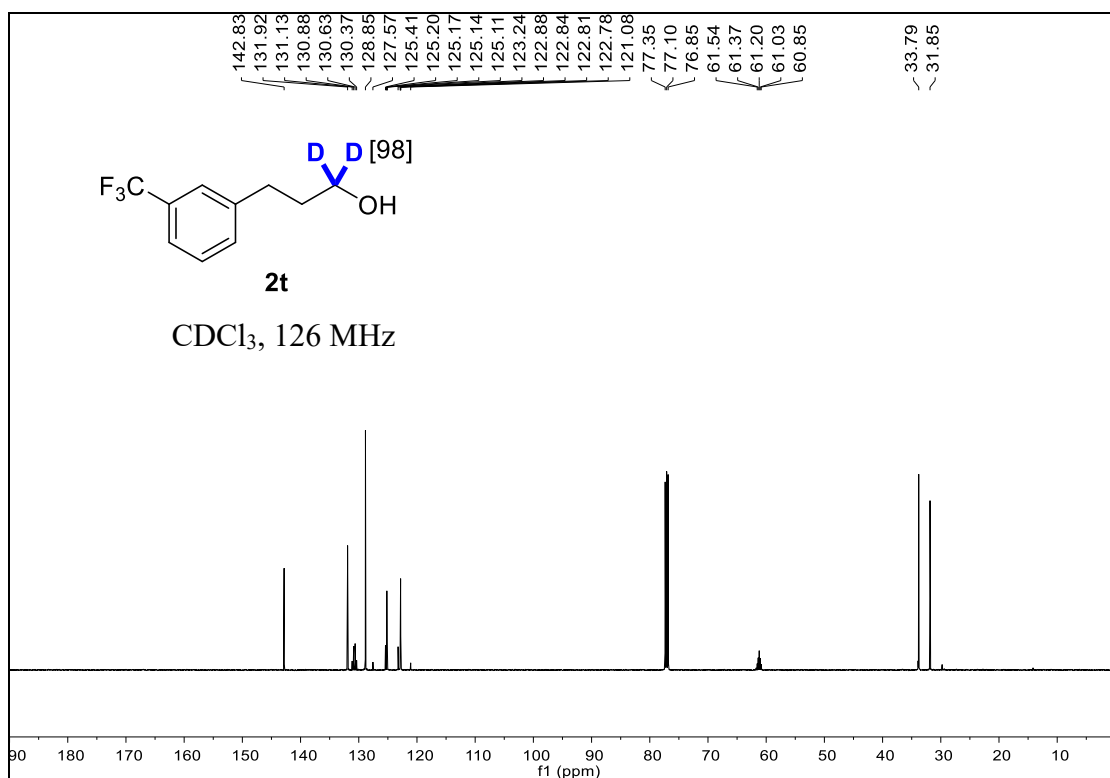

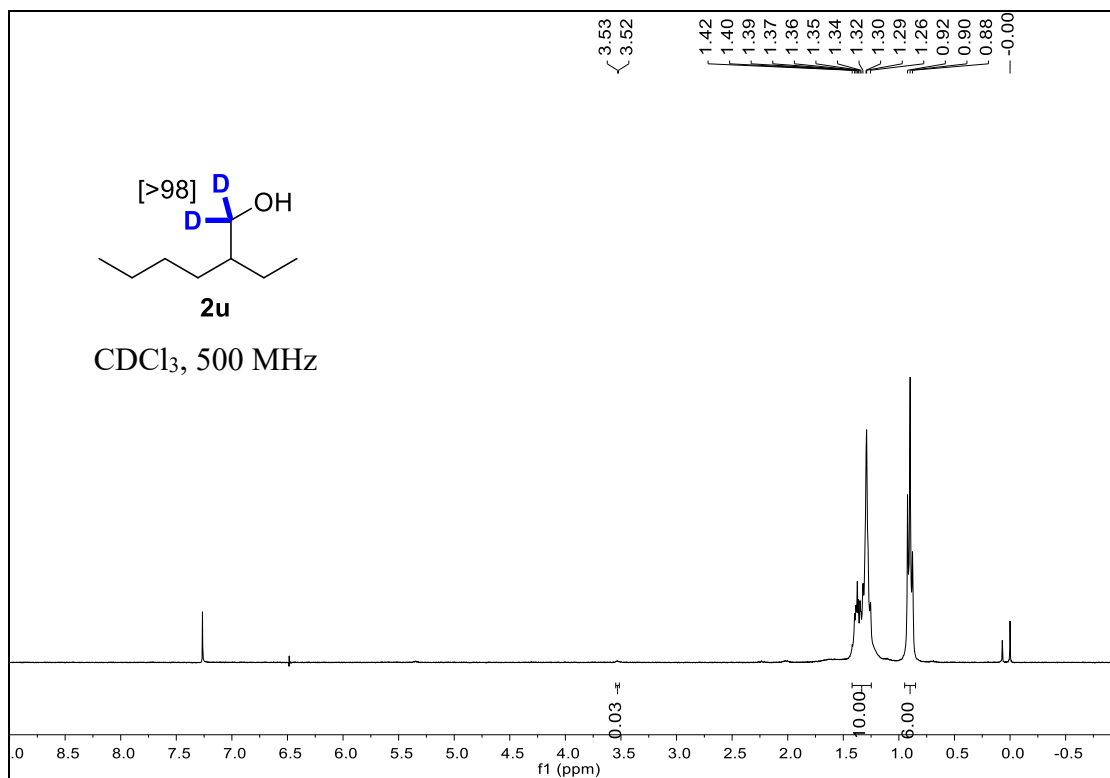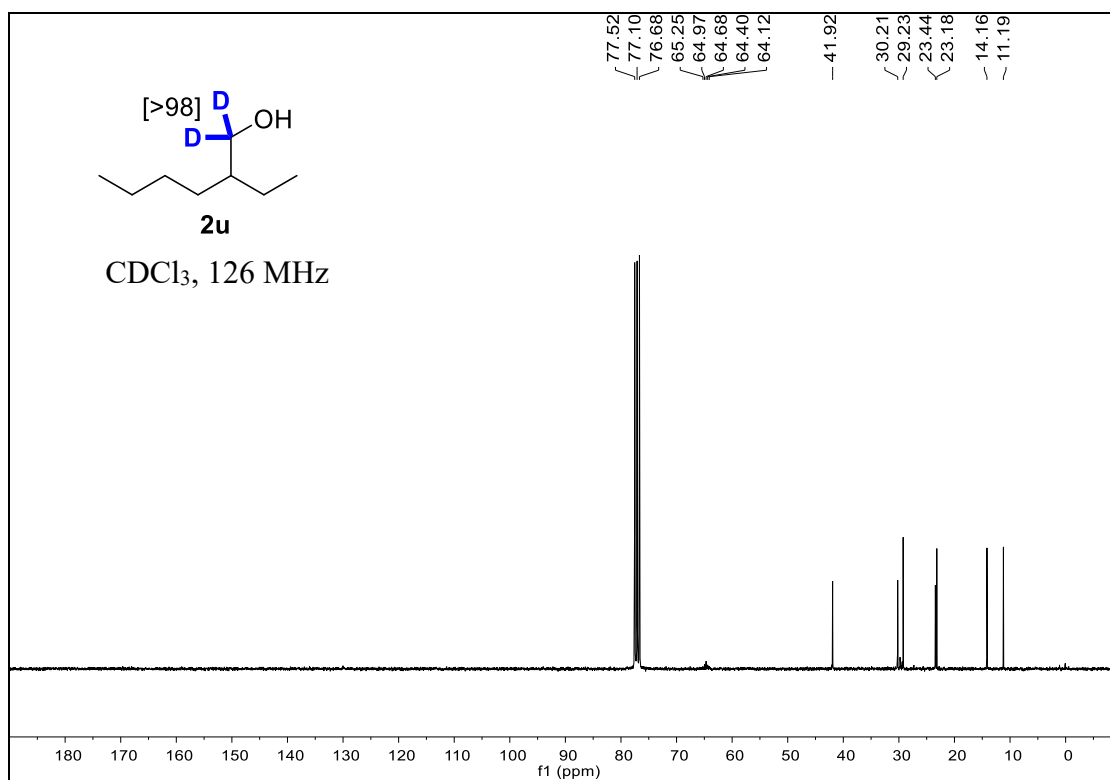

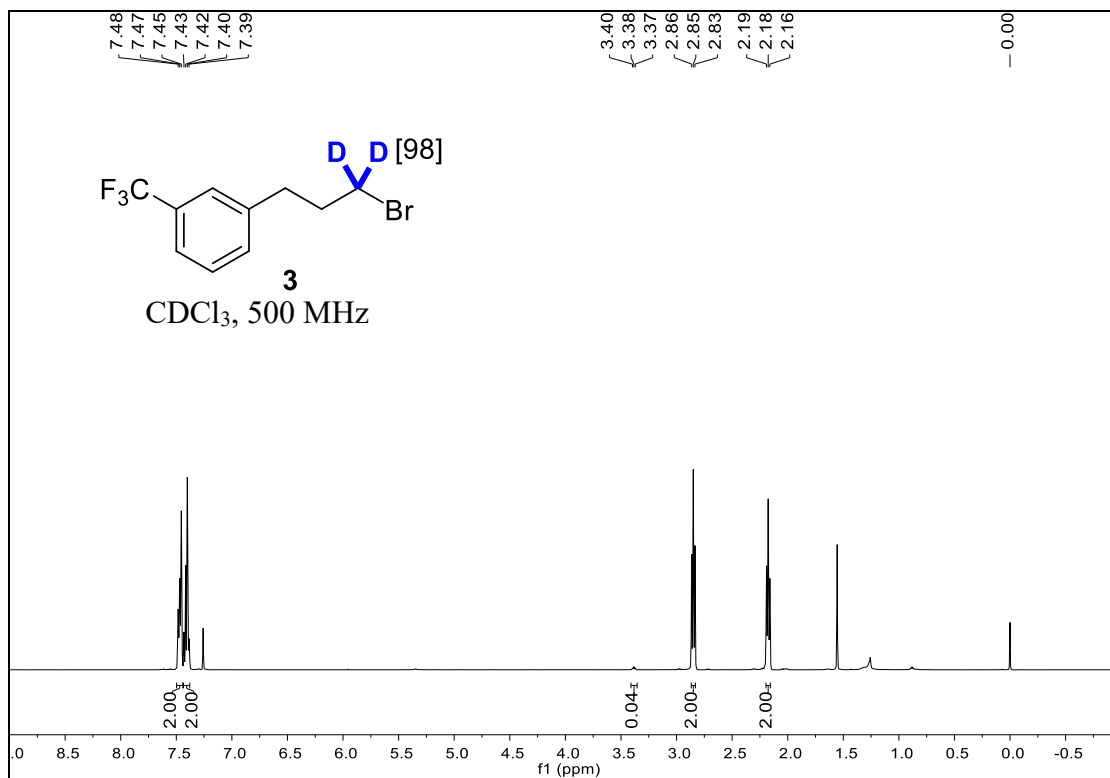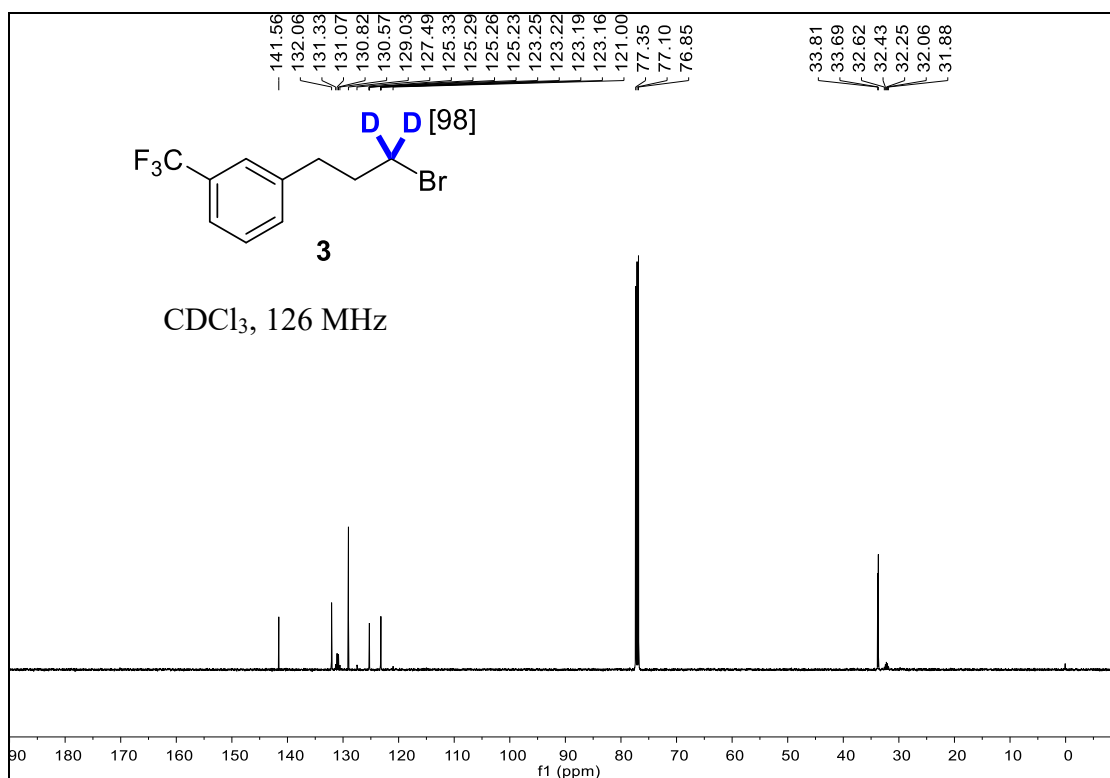

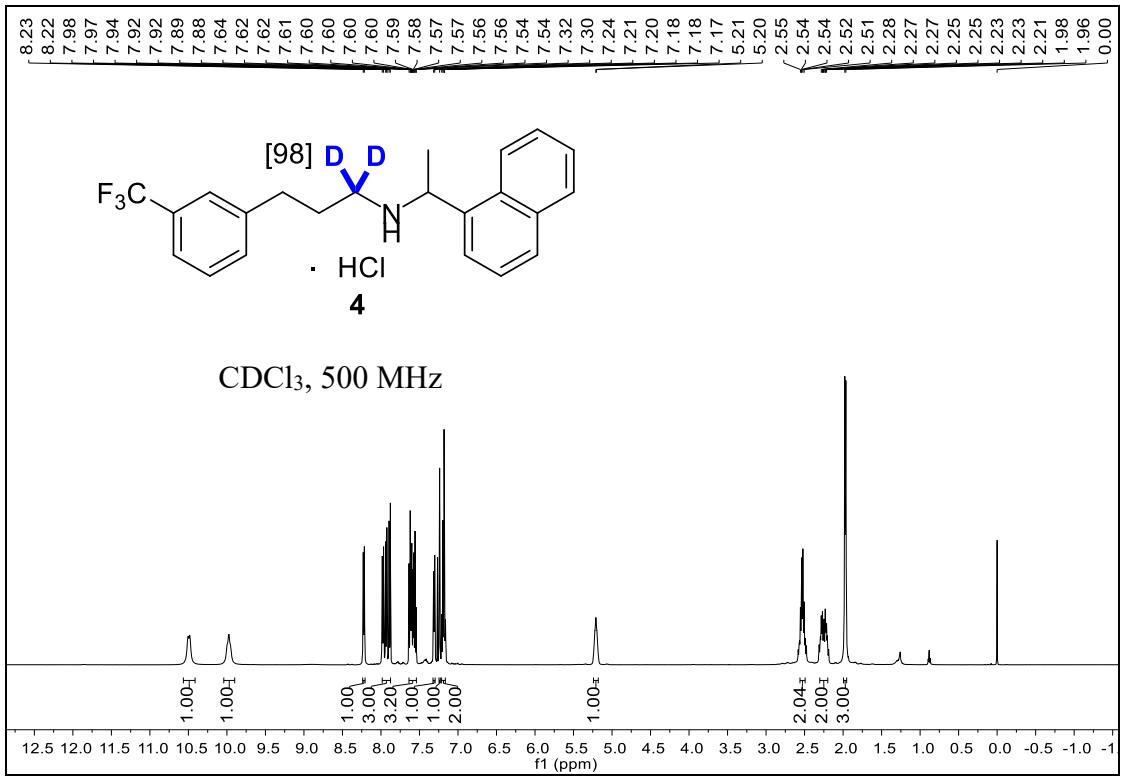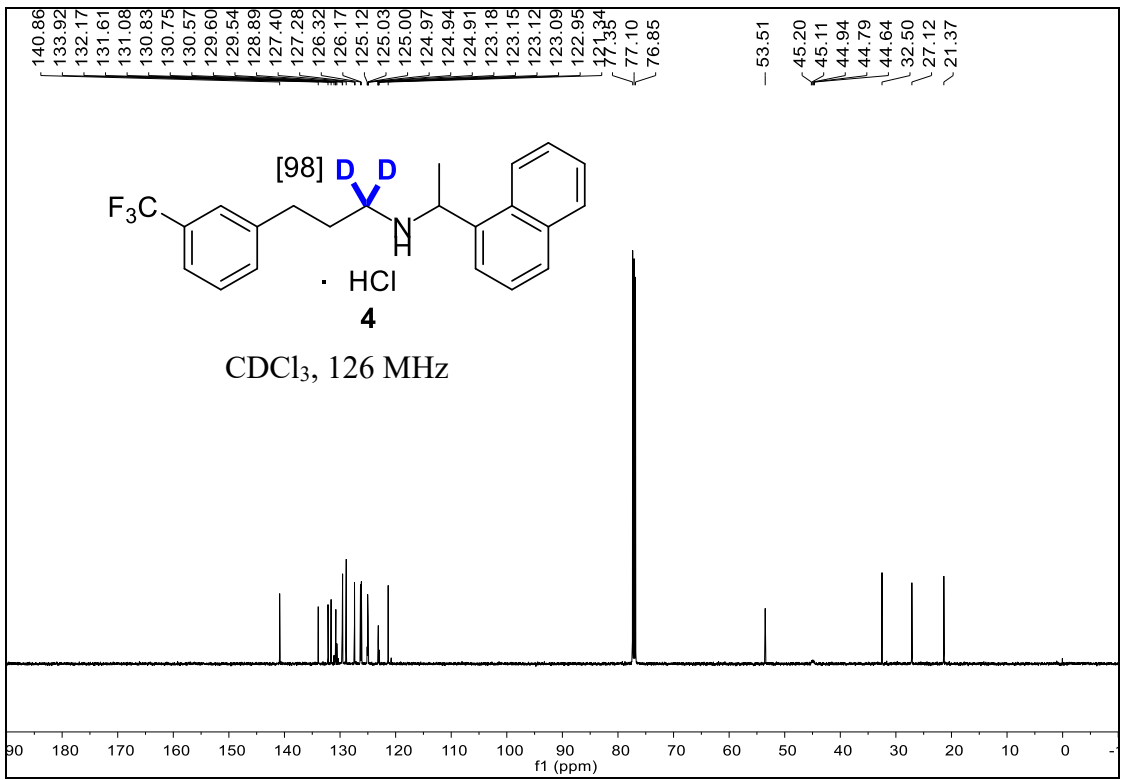



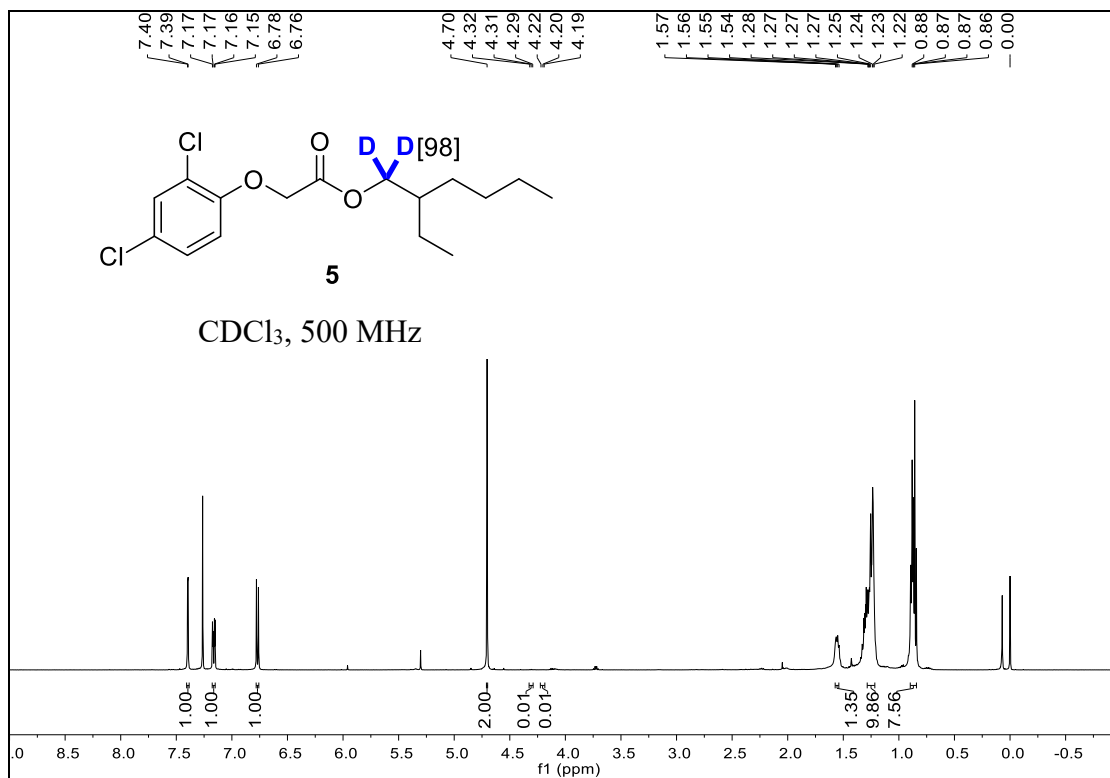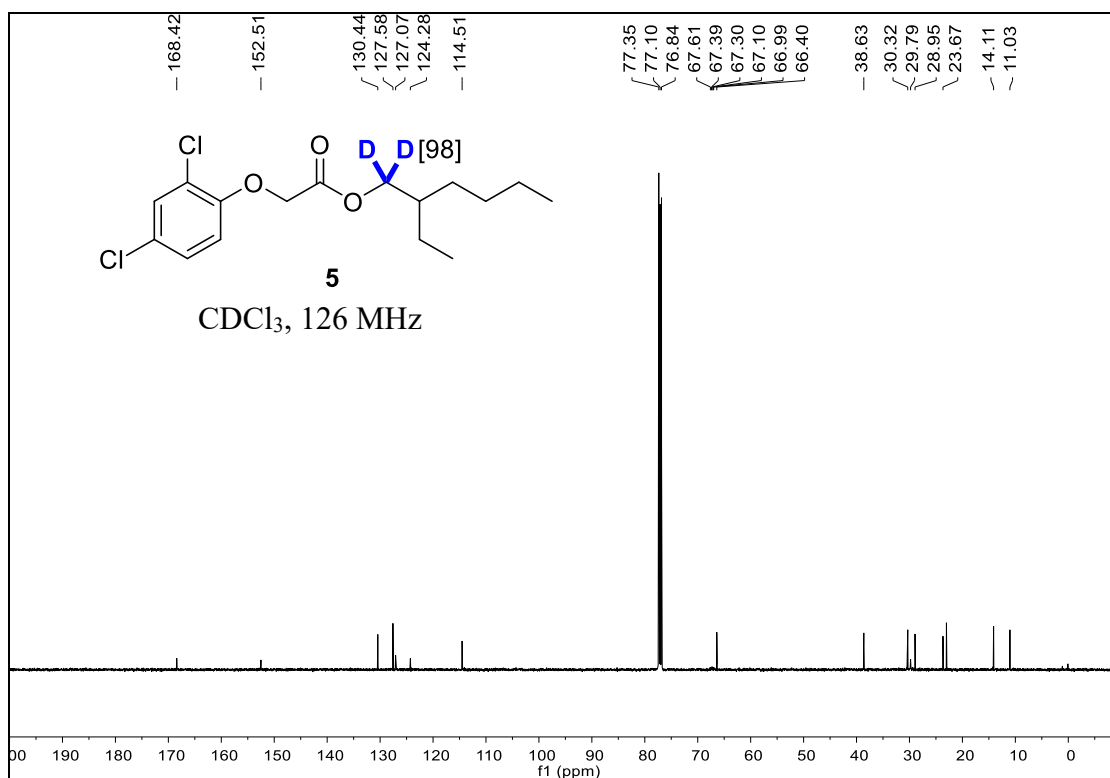

## 8. $^1\text{H}$ and $^{13}\text{C}$ NMR Spectra of Substrates

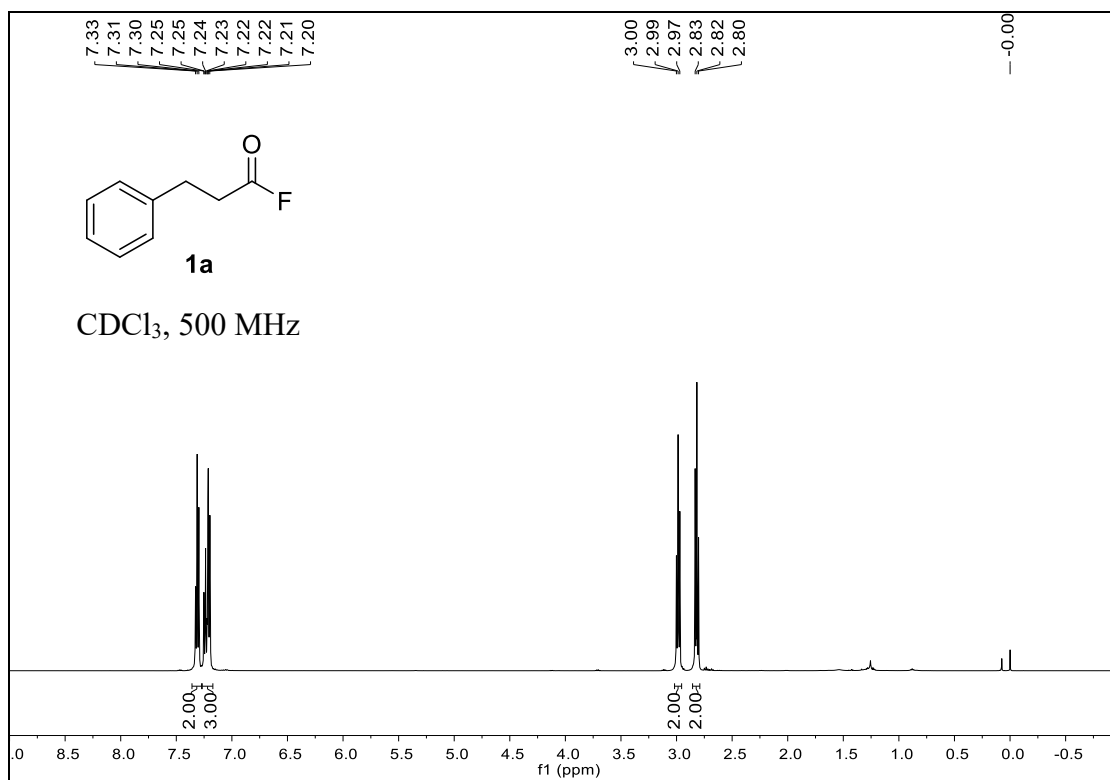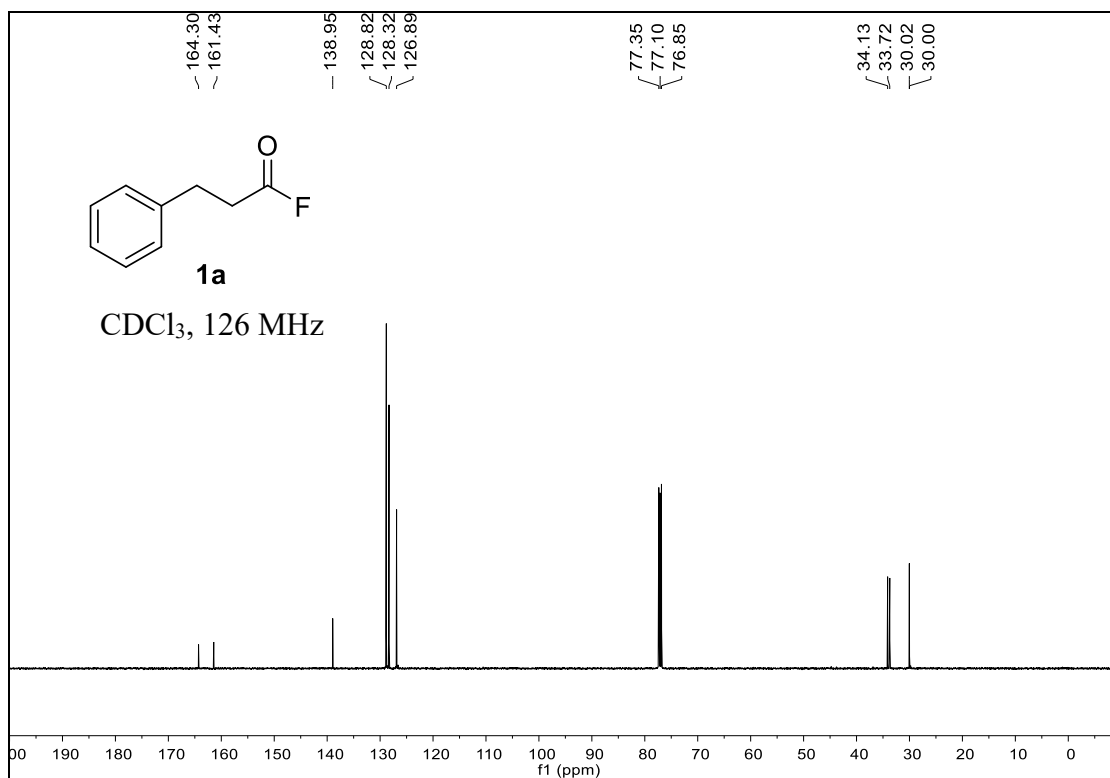

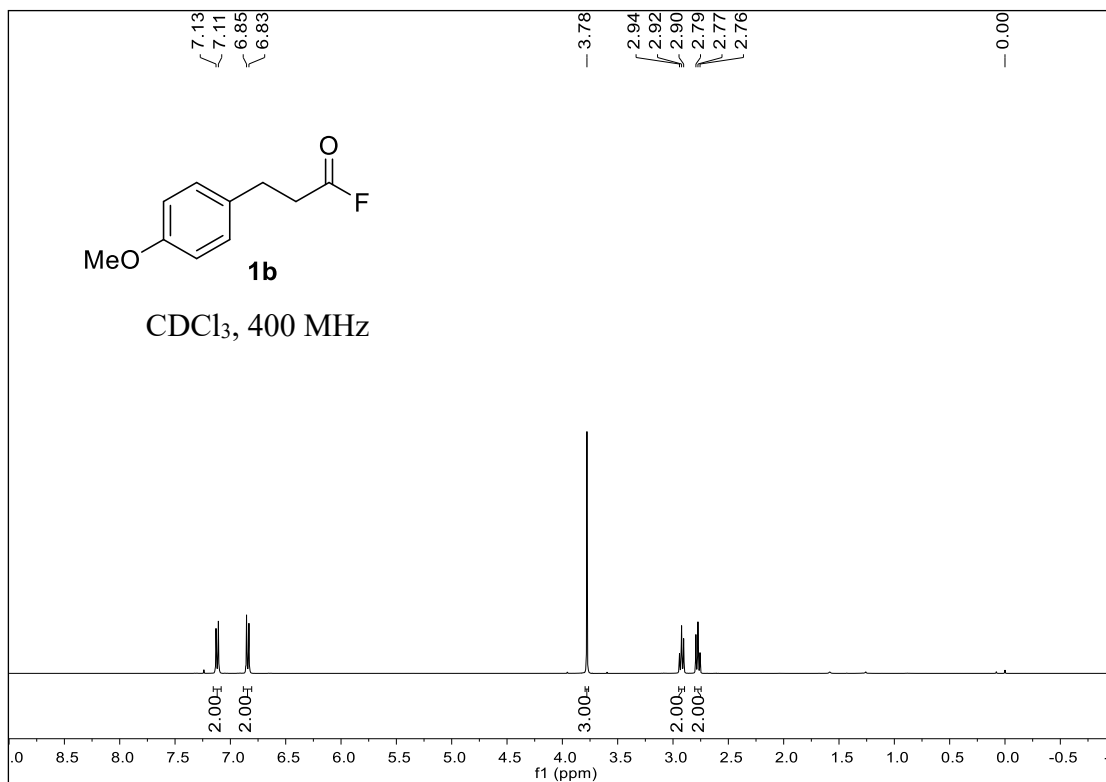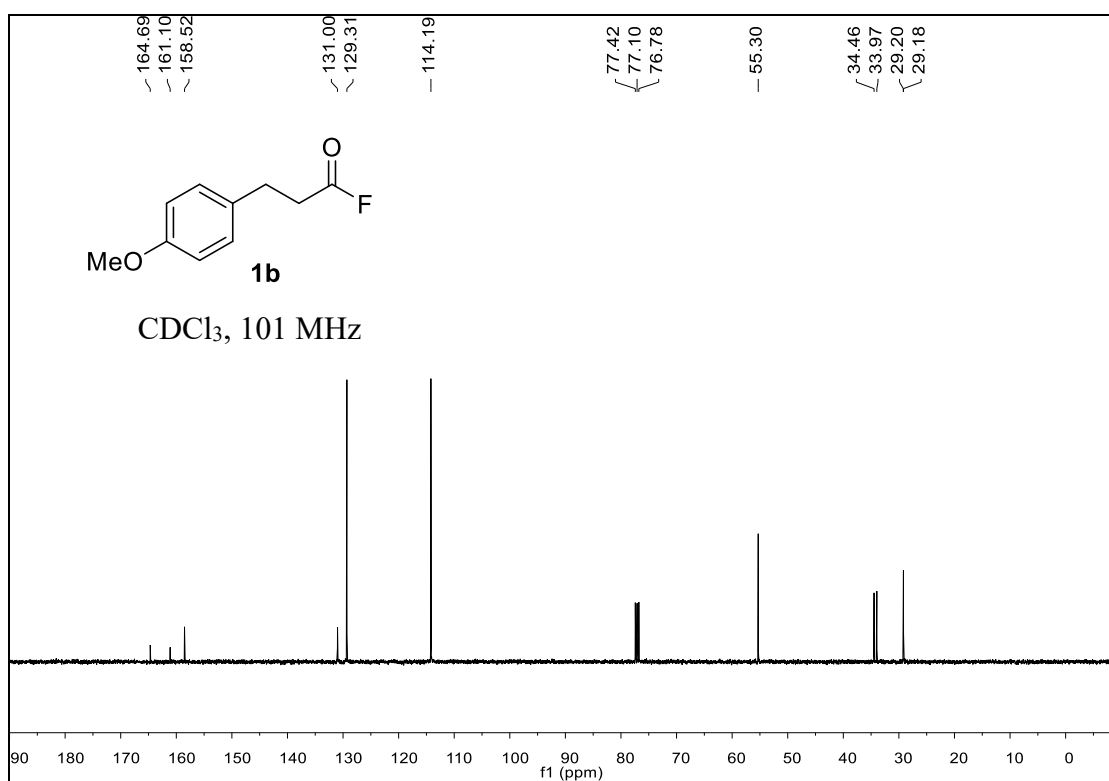

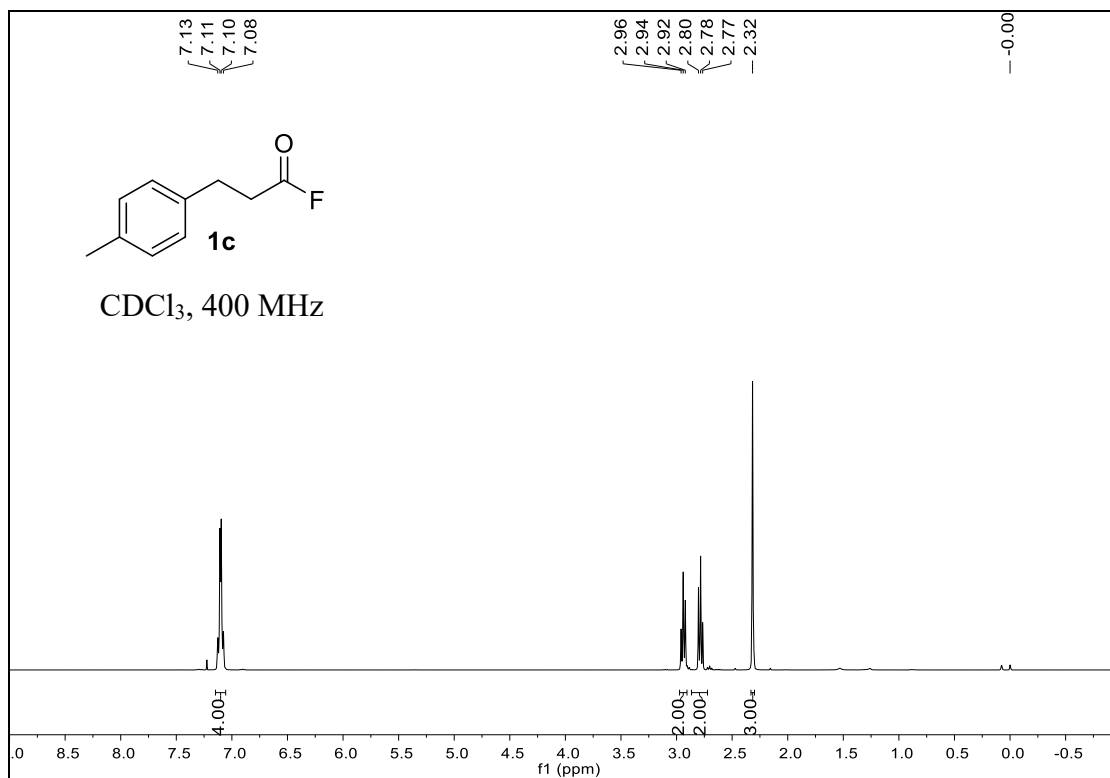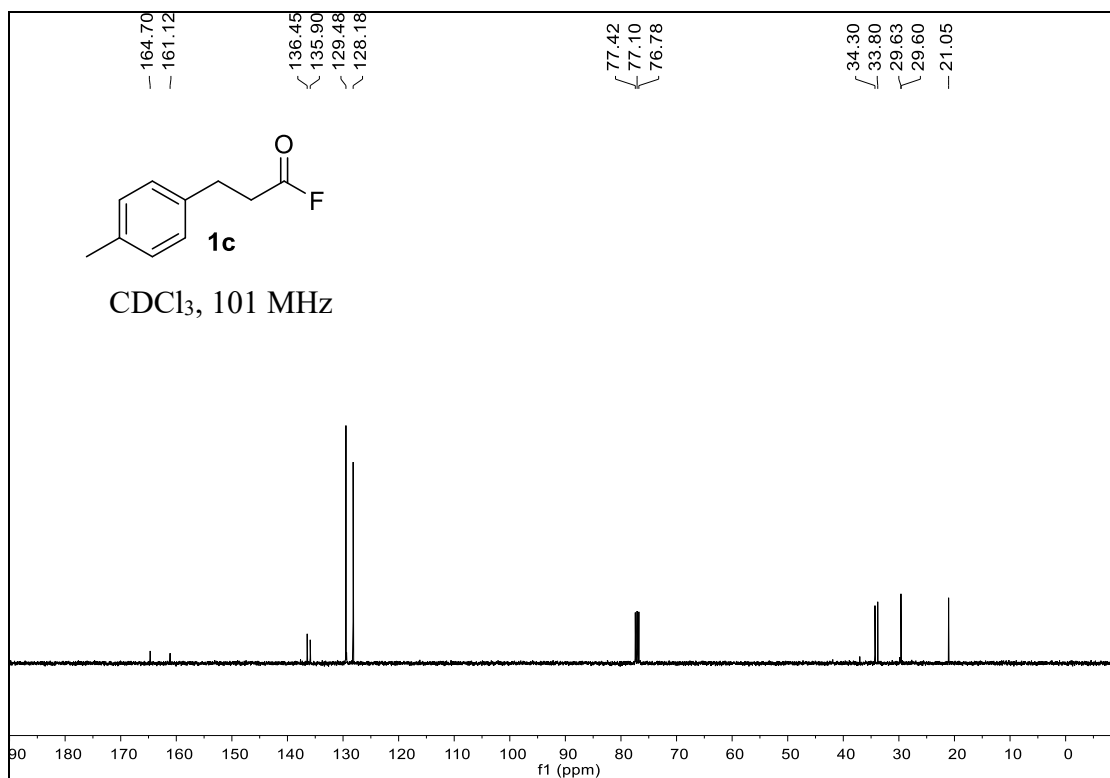

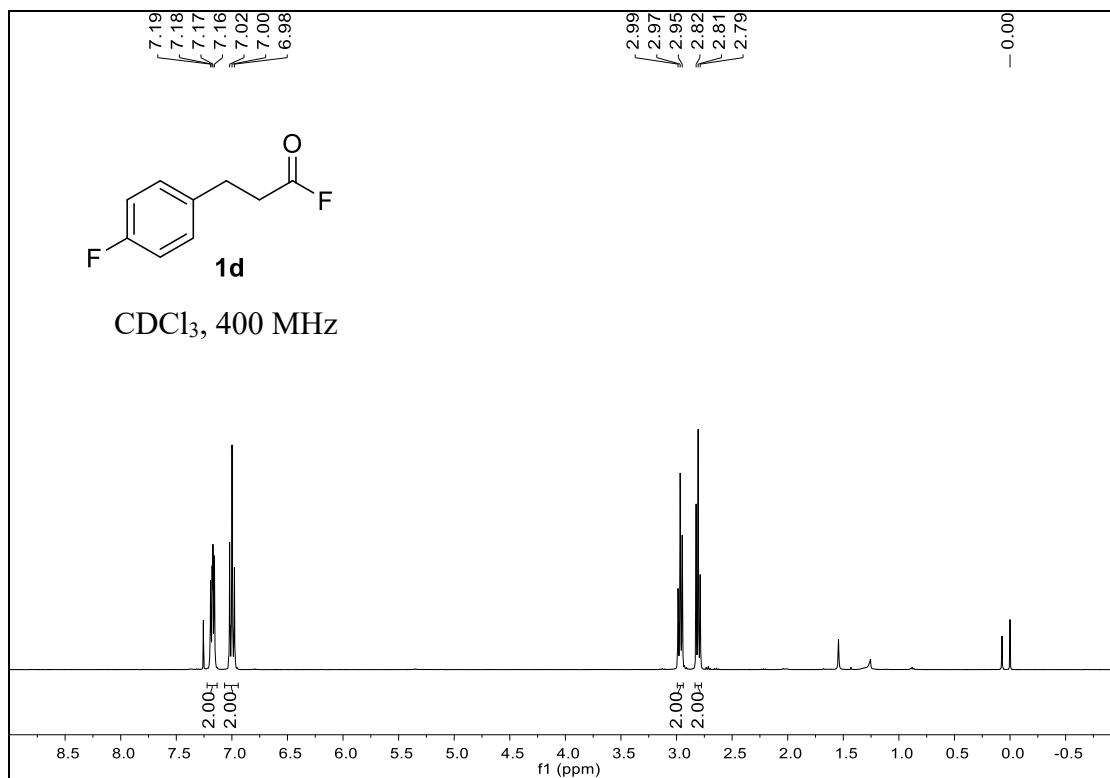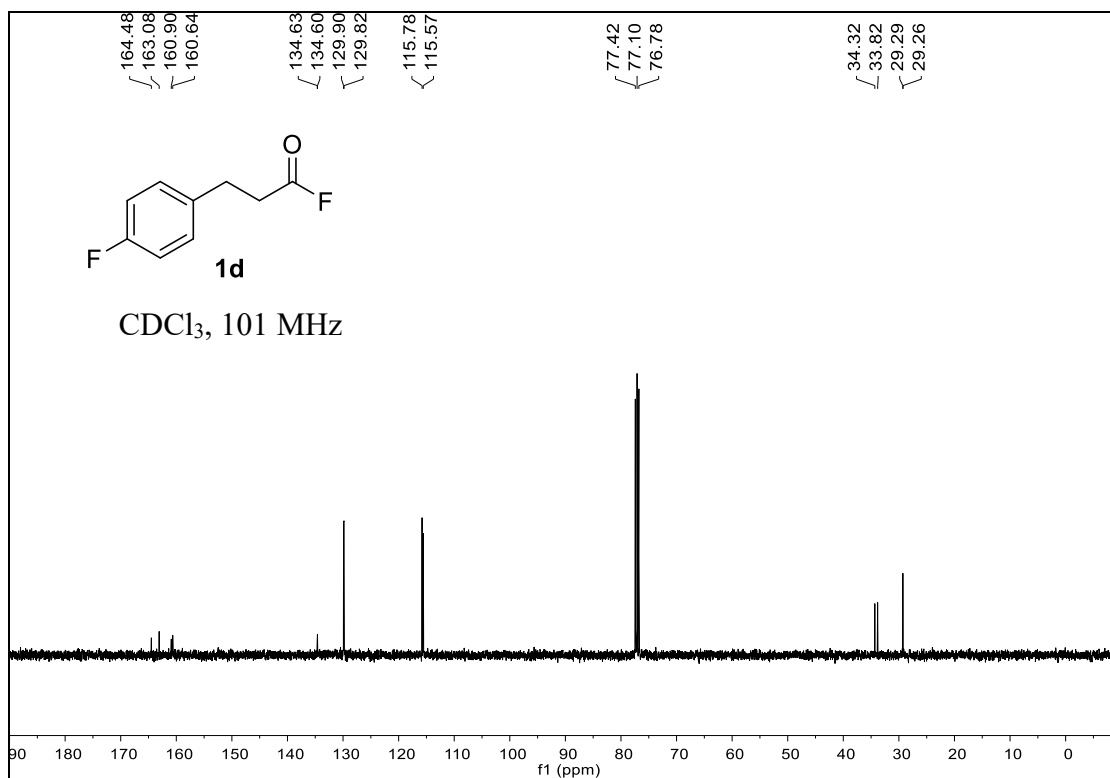

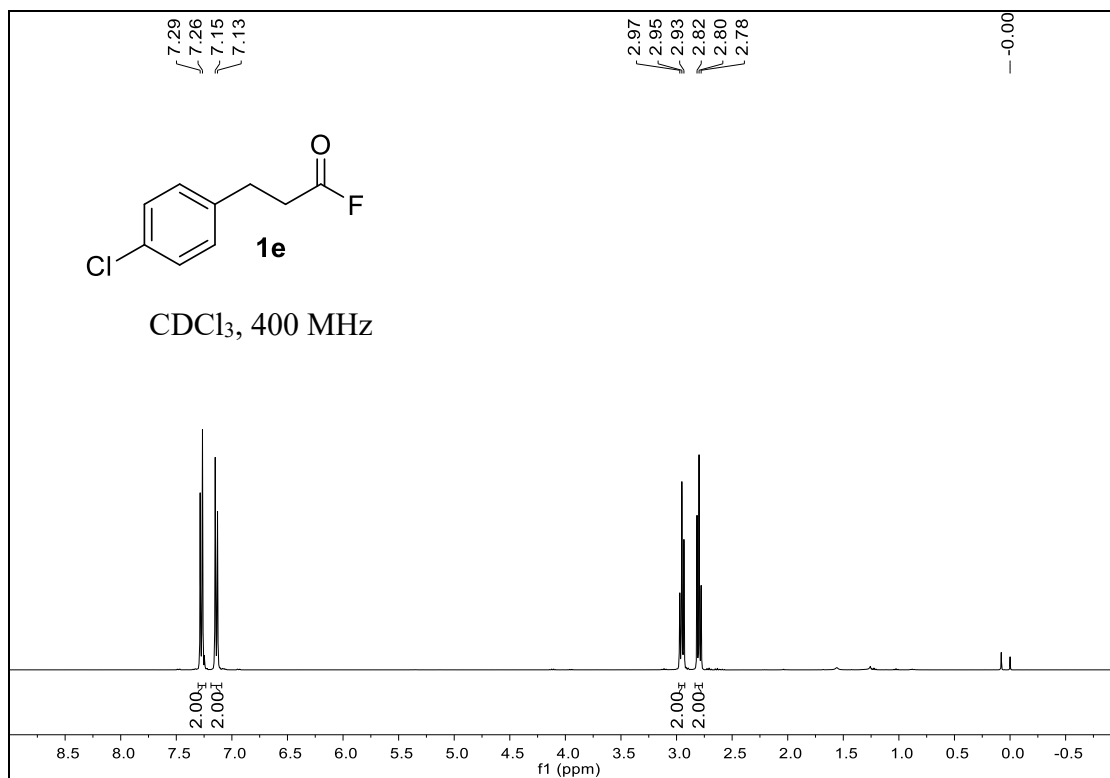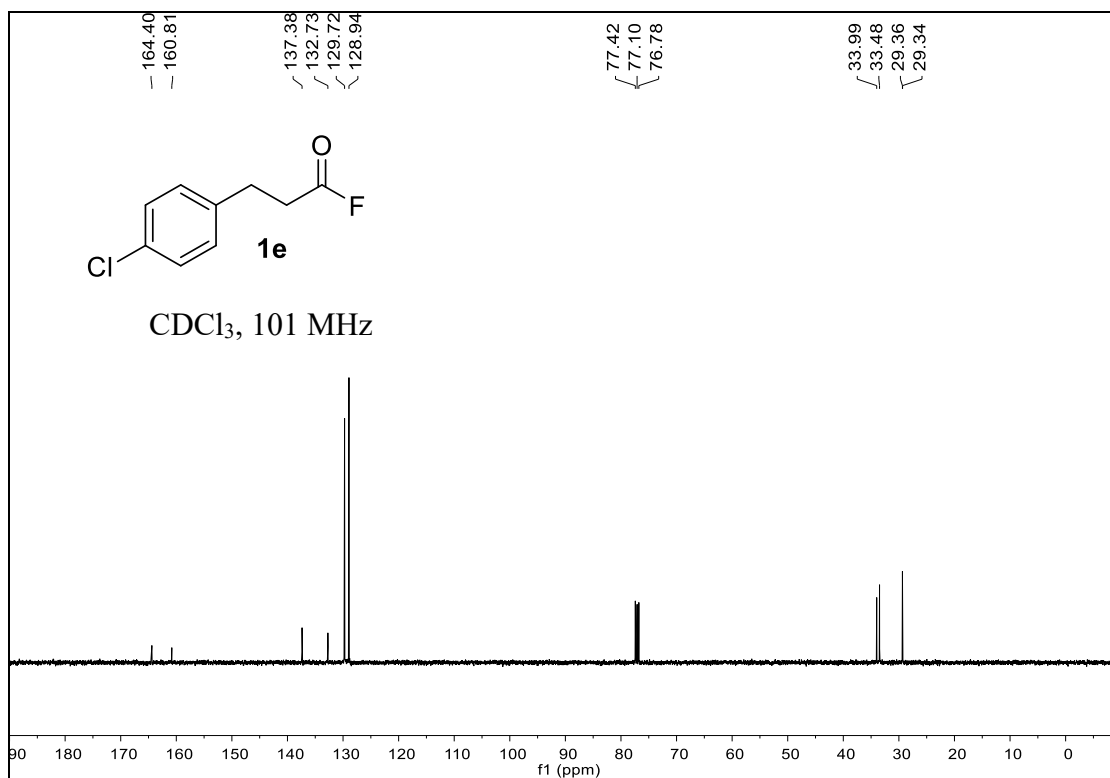

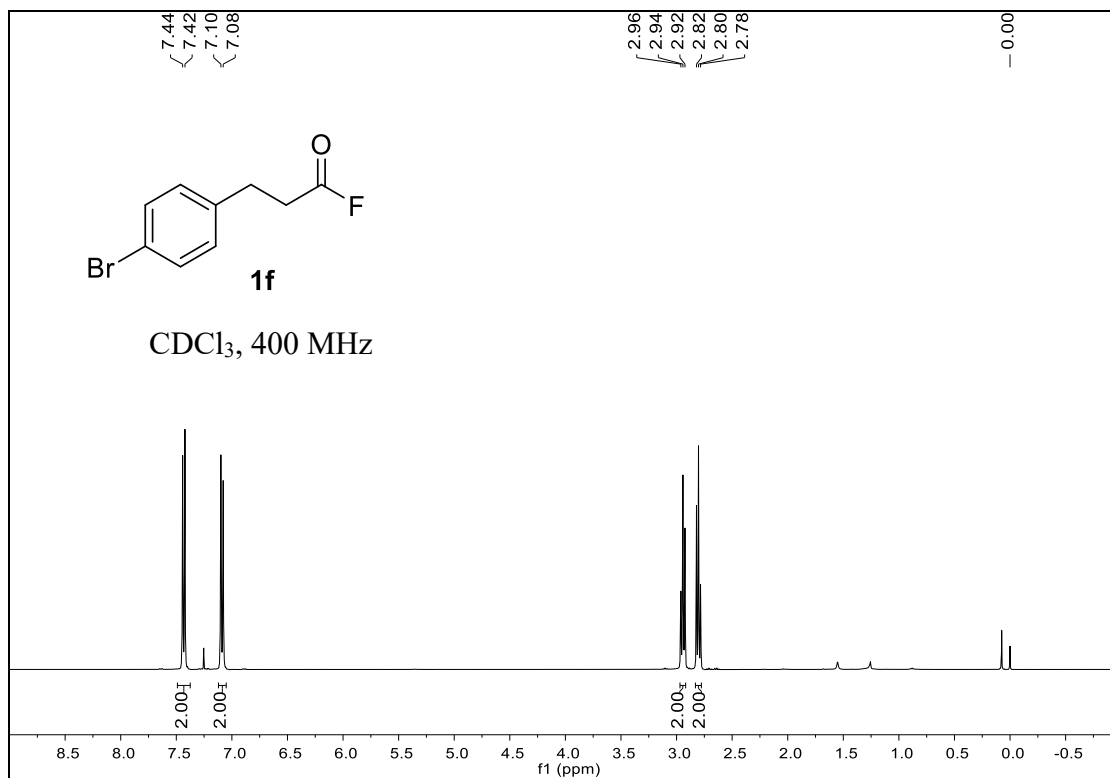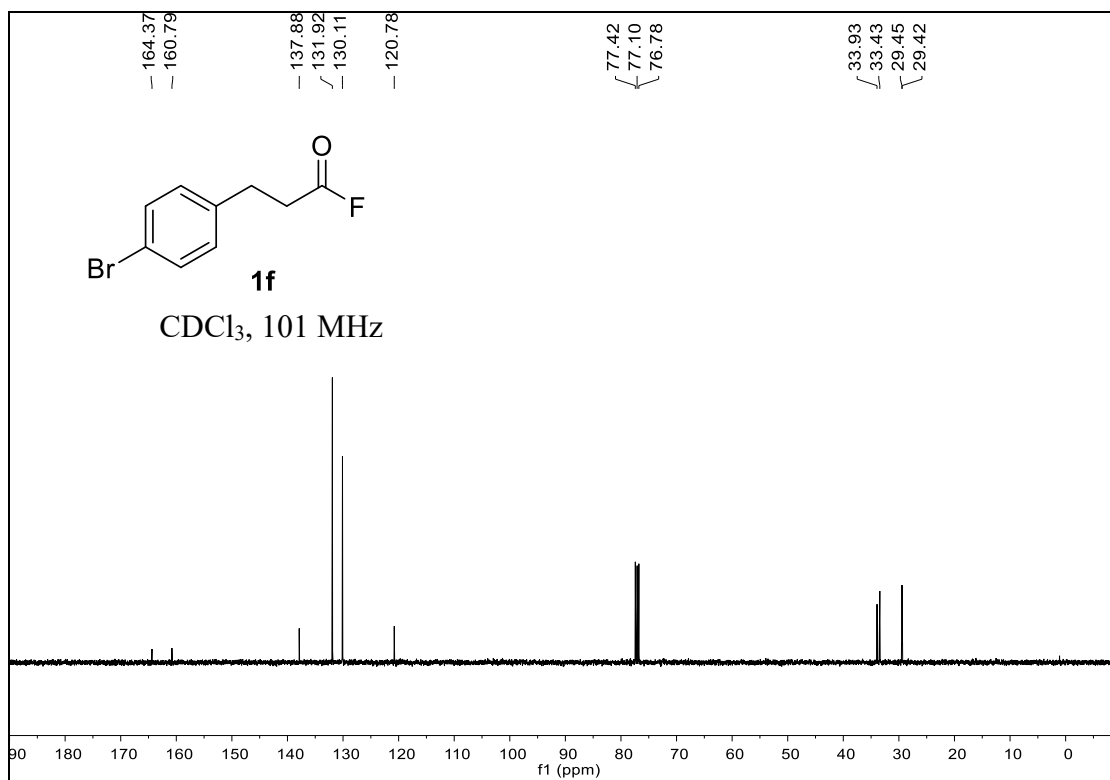

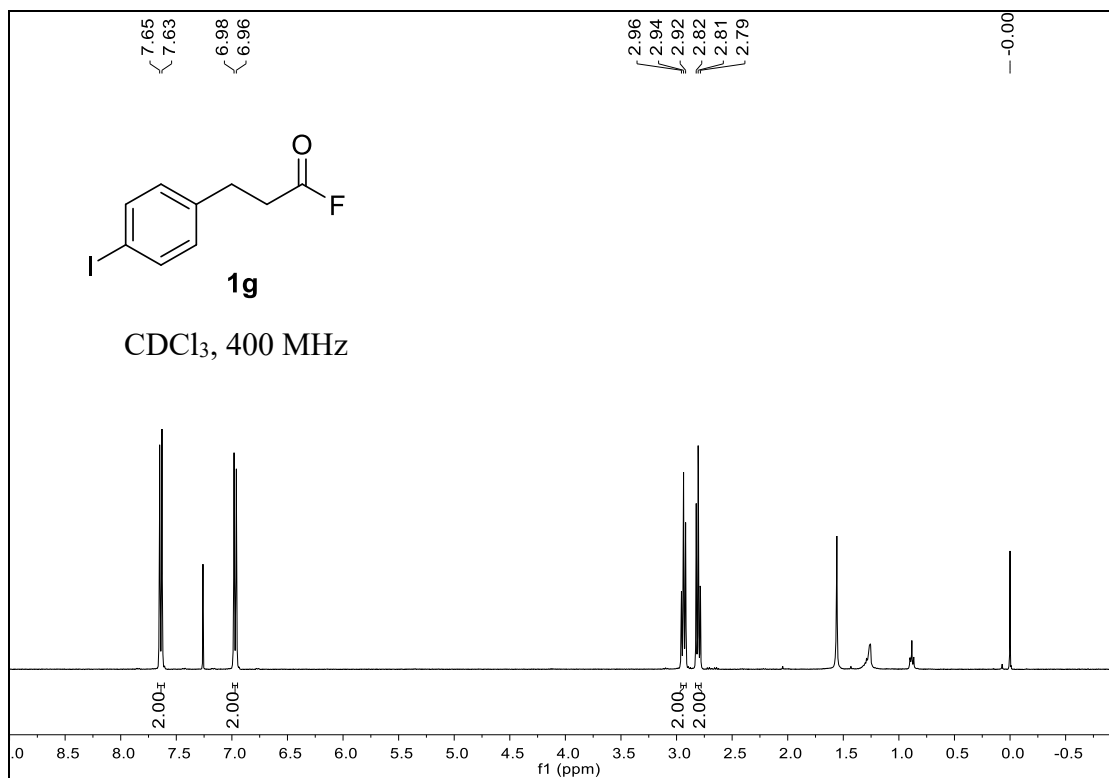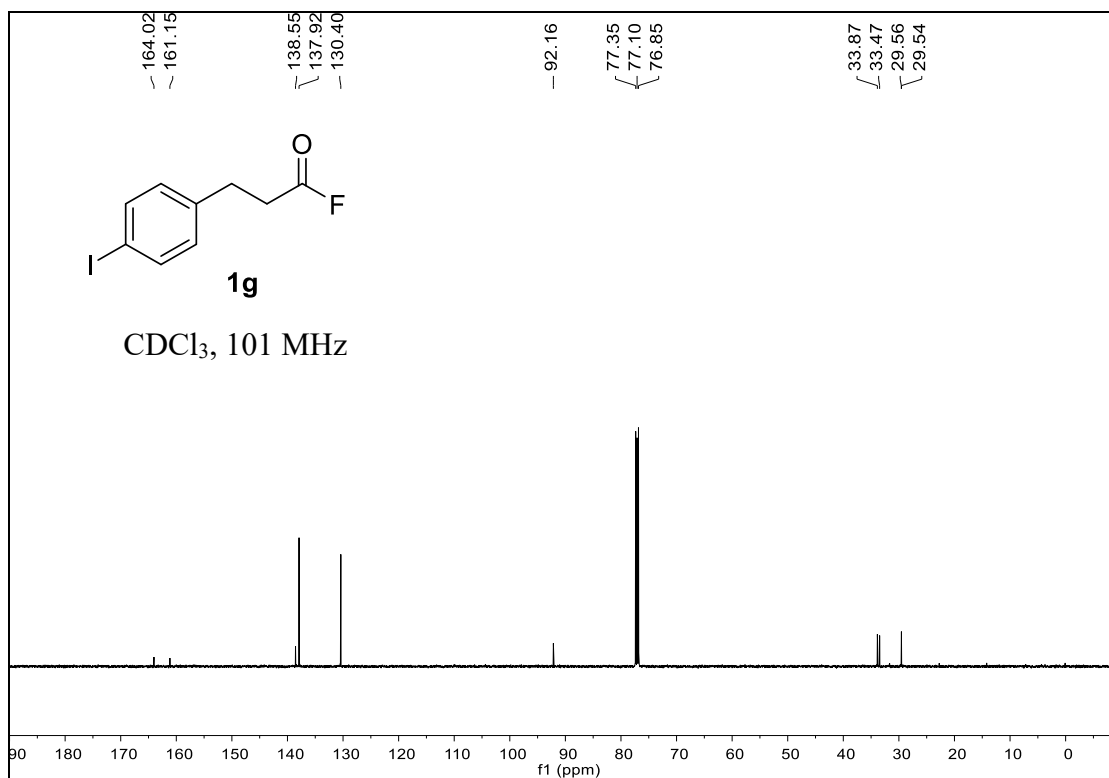



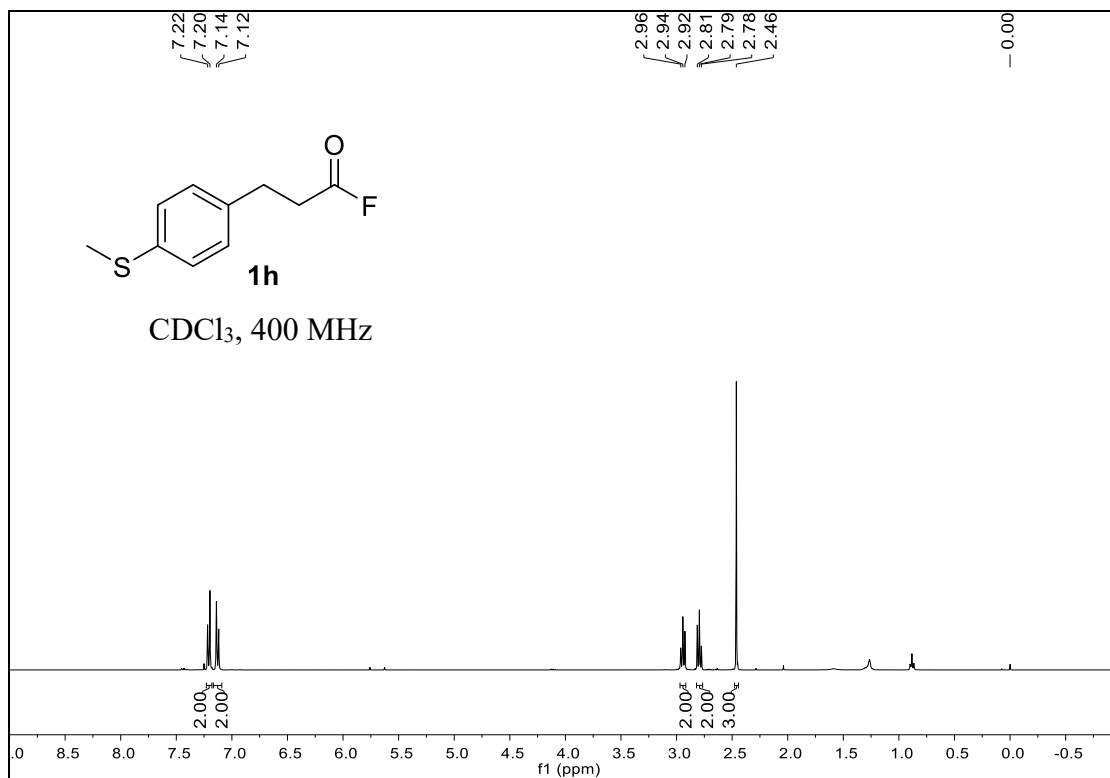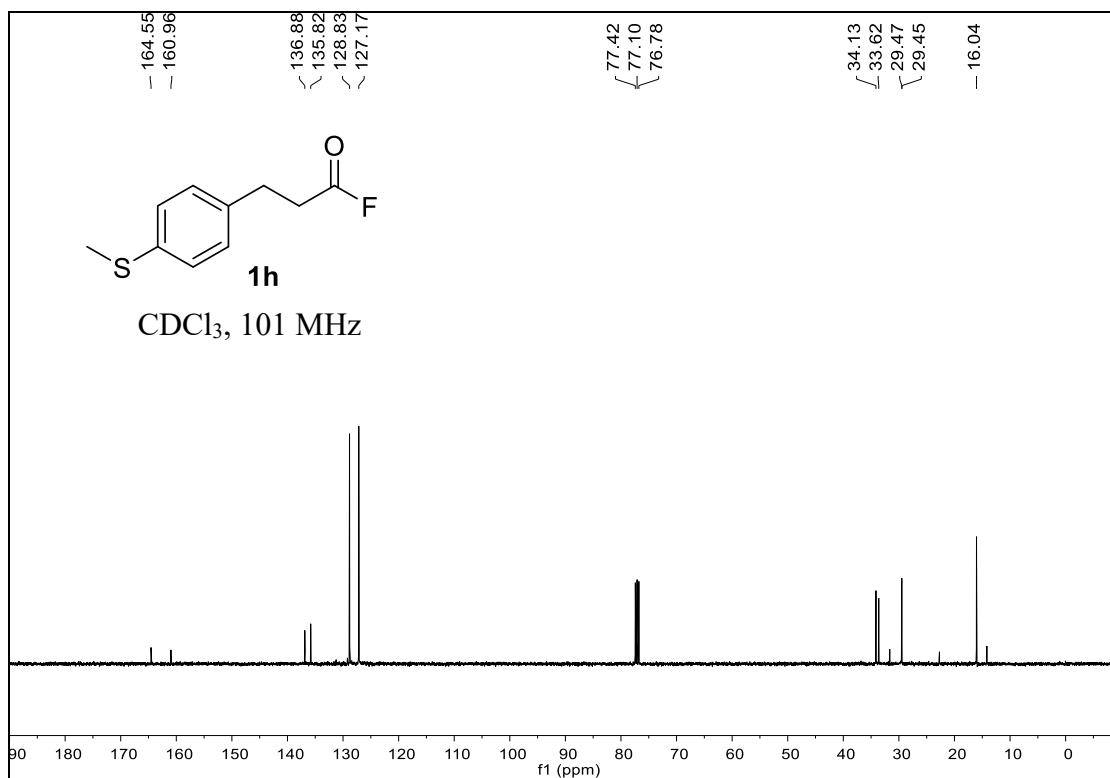

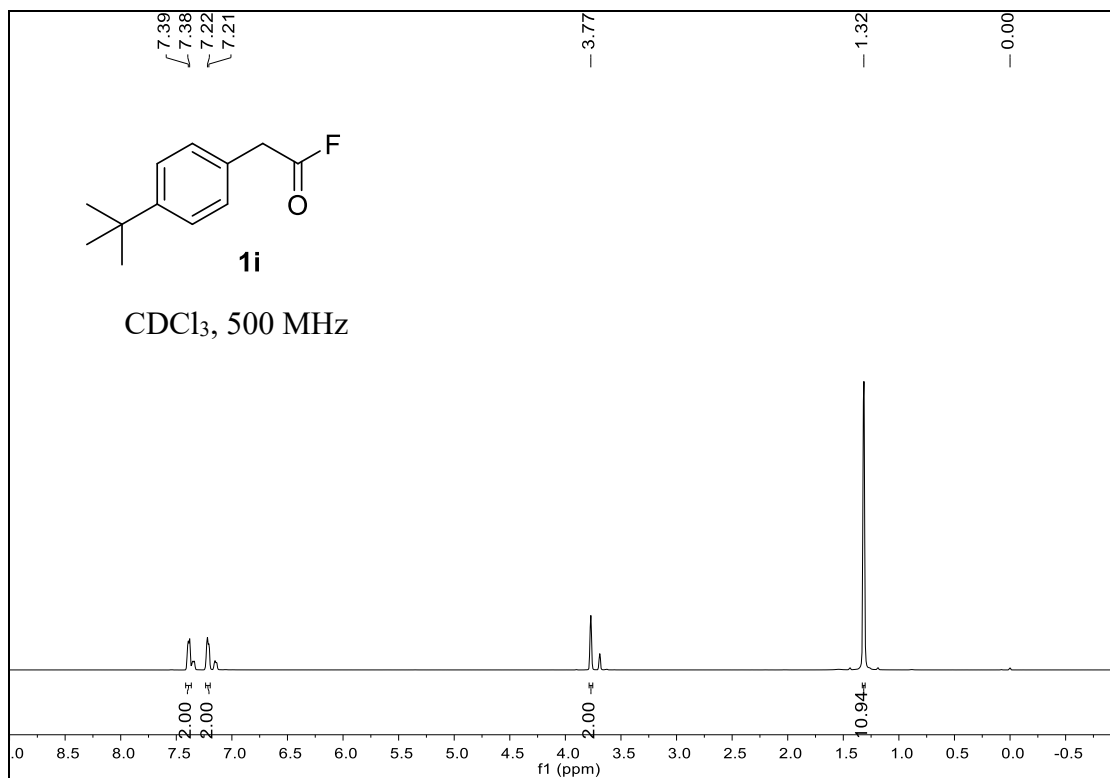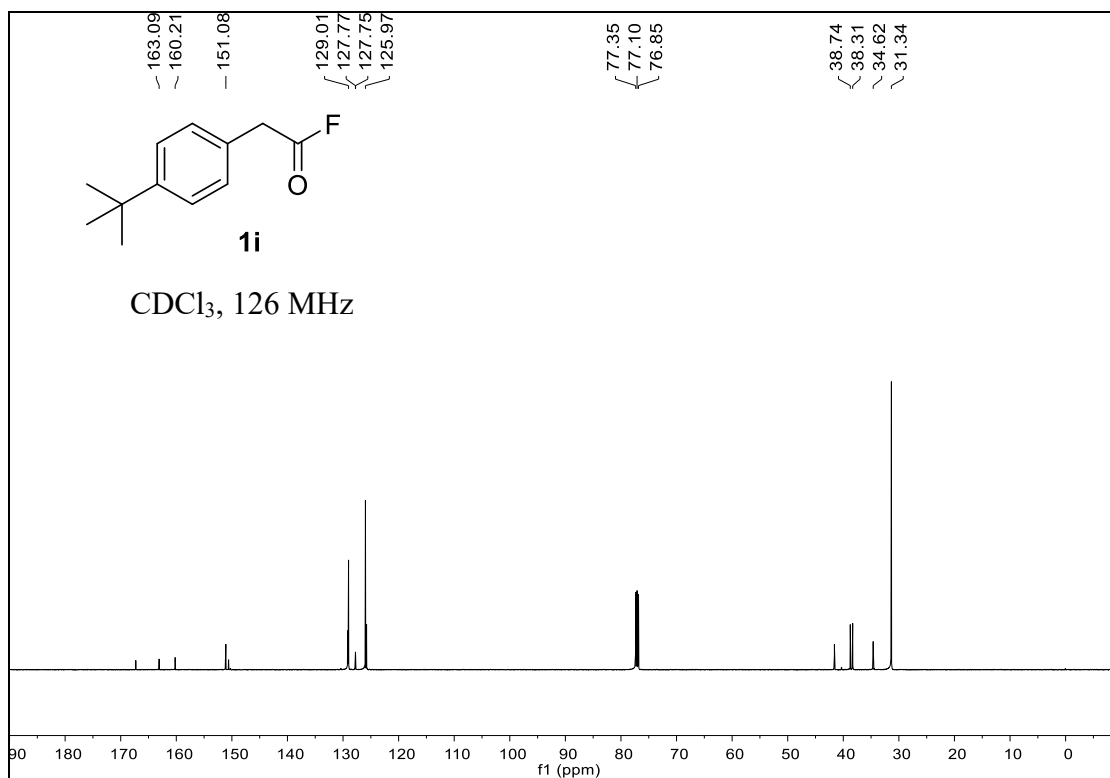

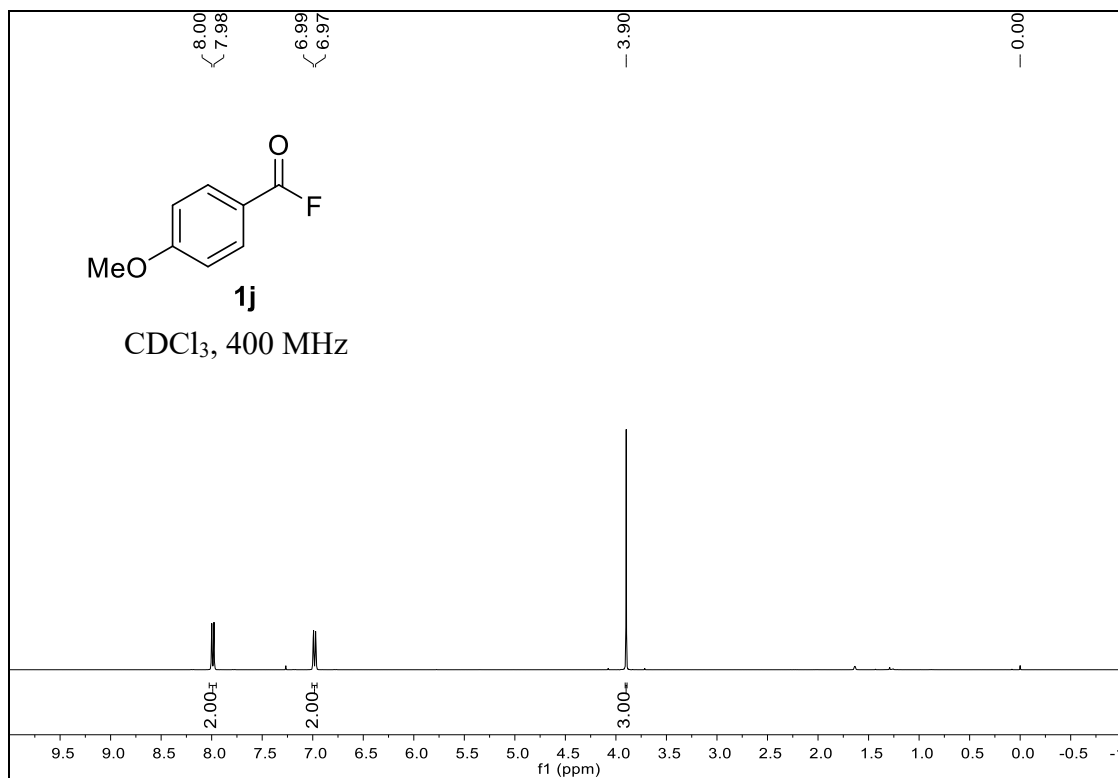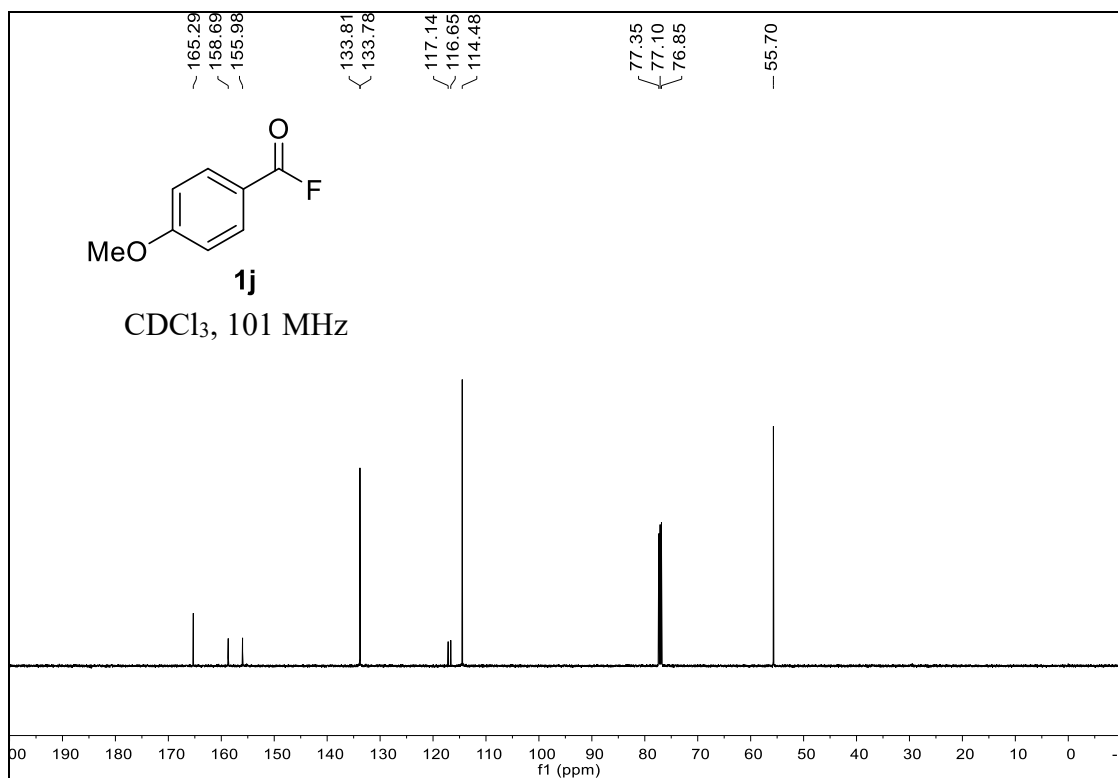

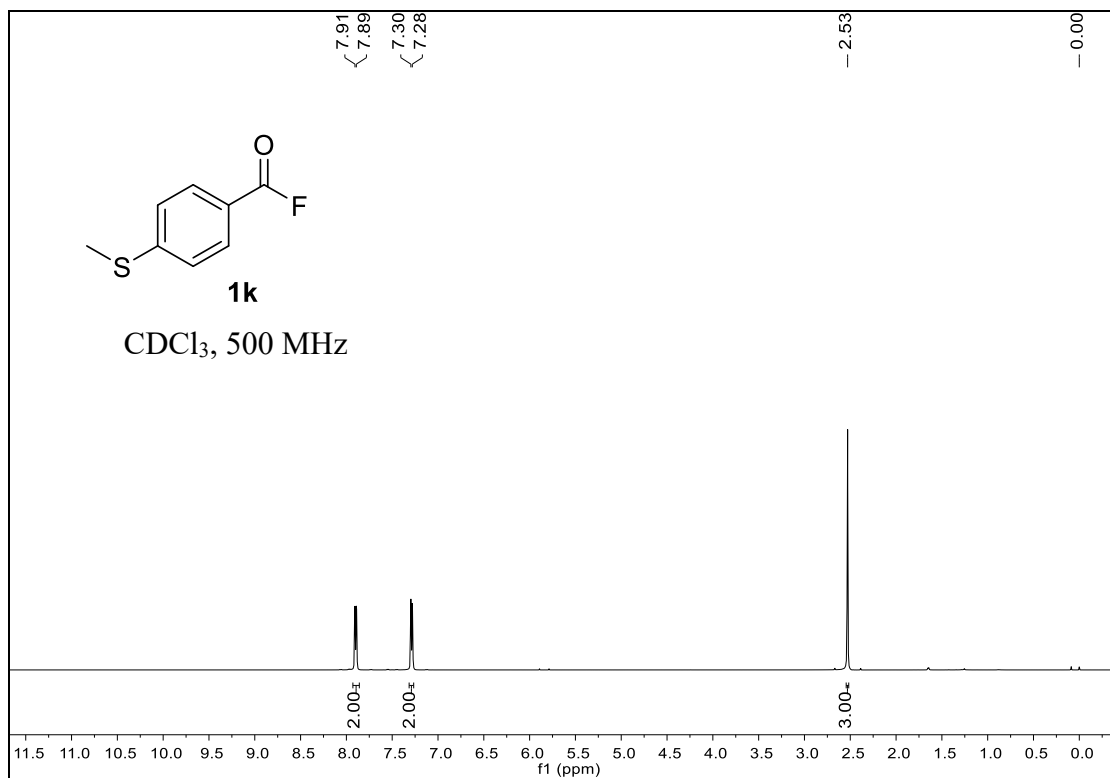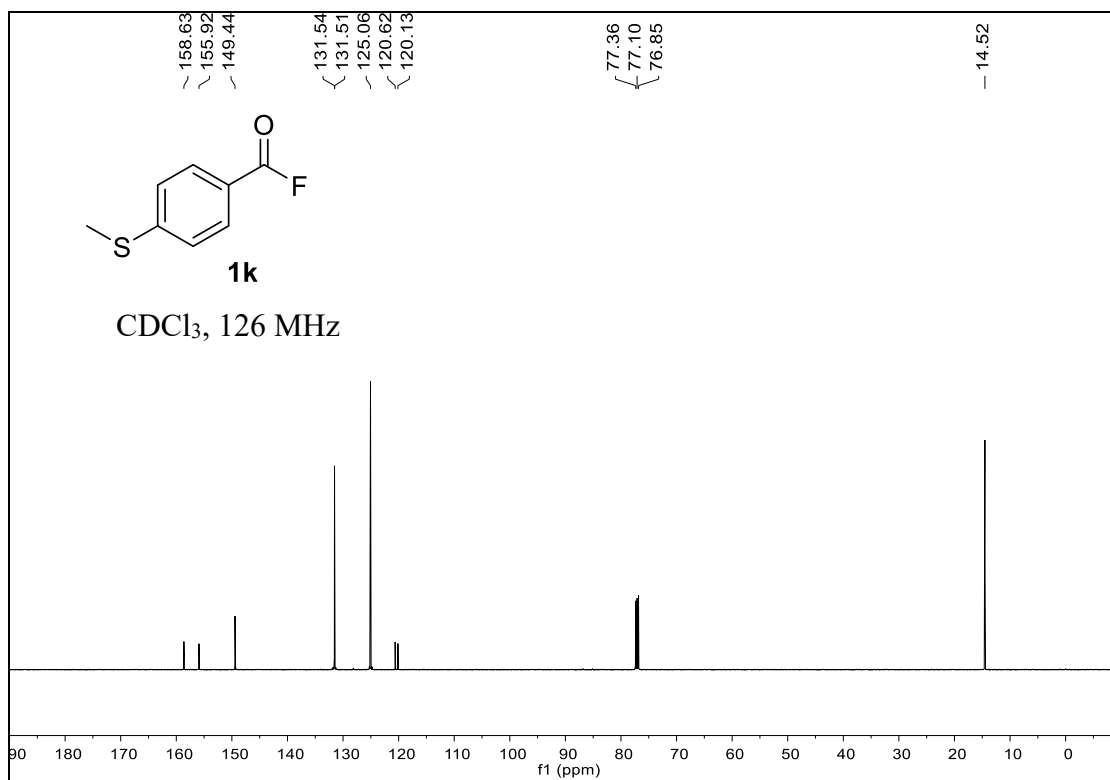

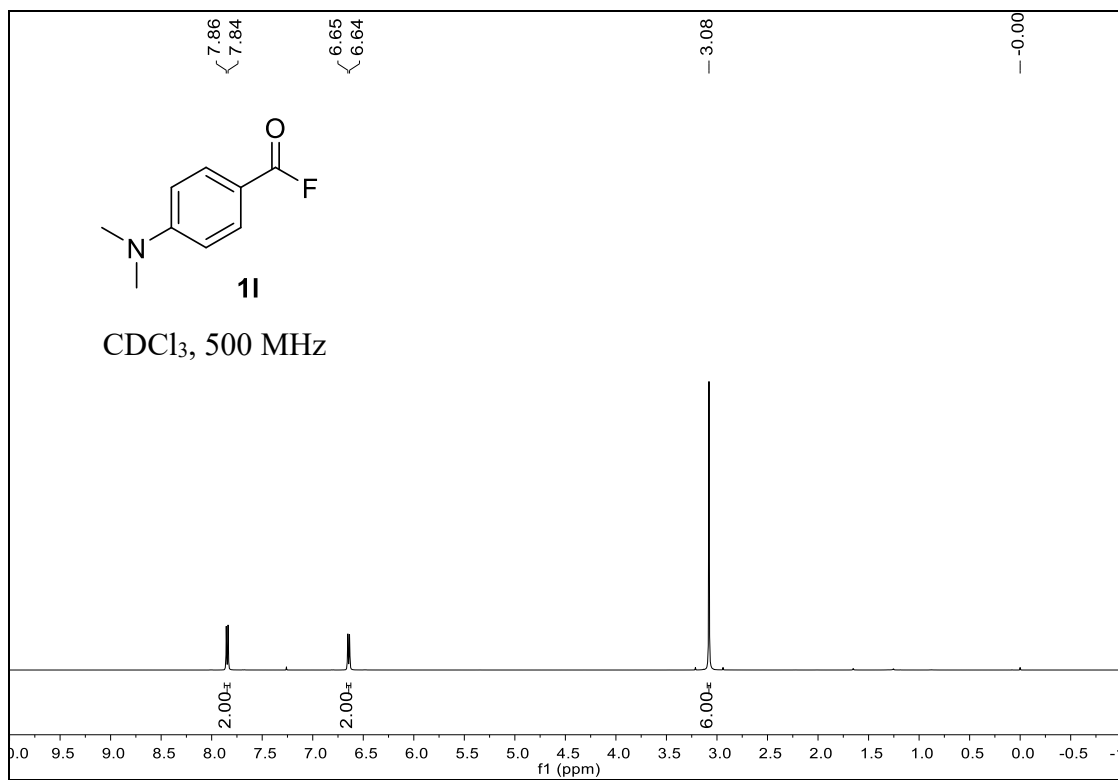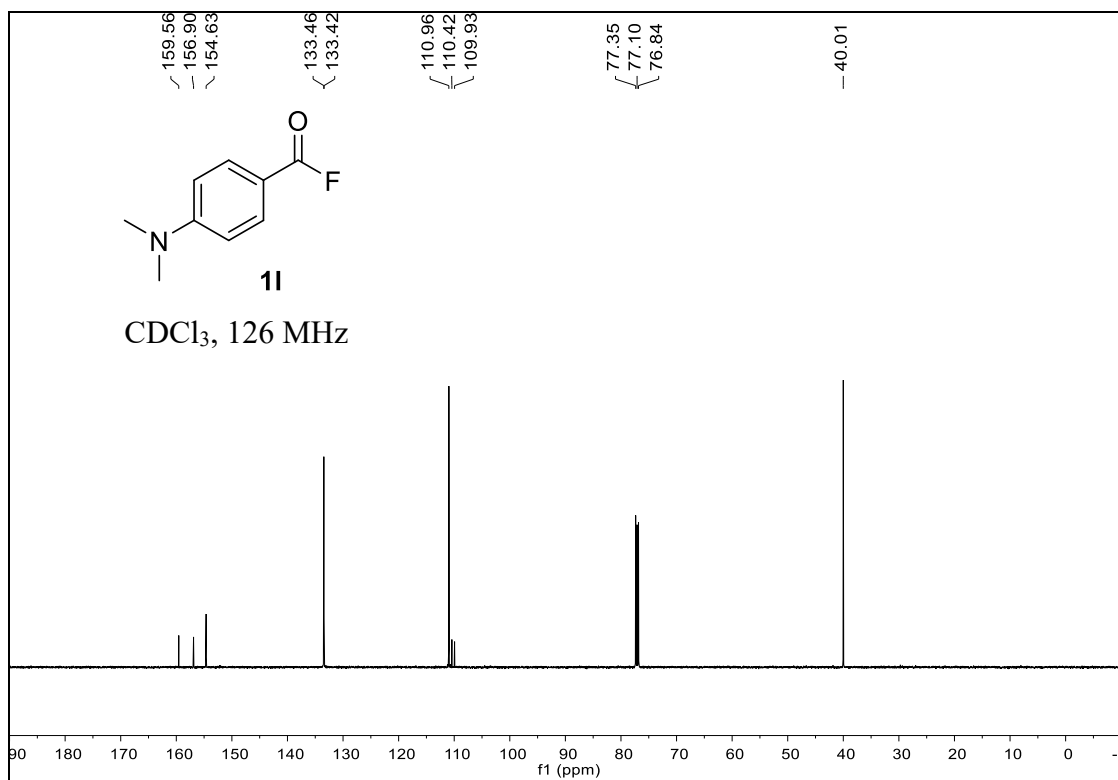

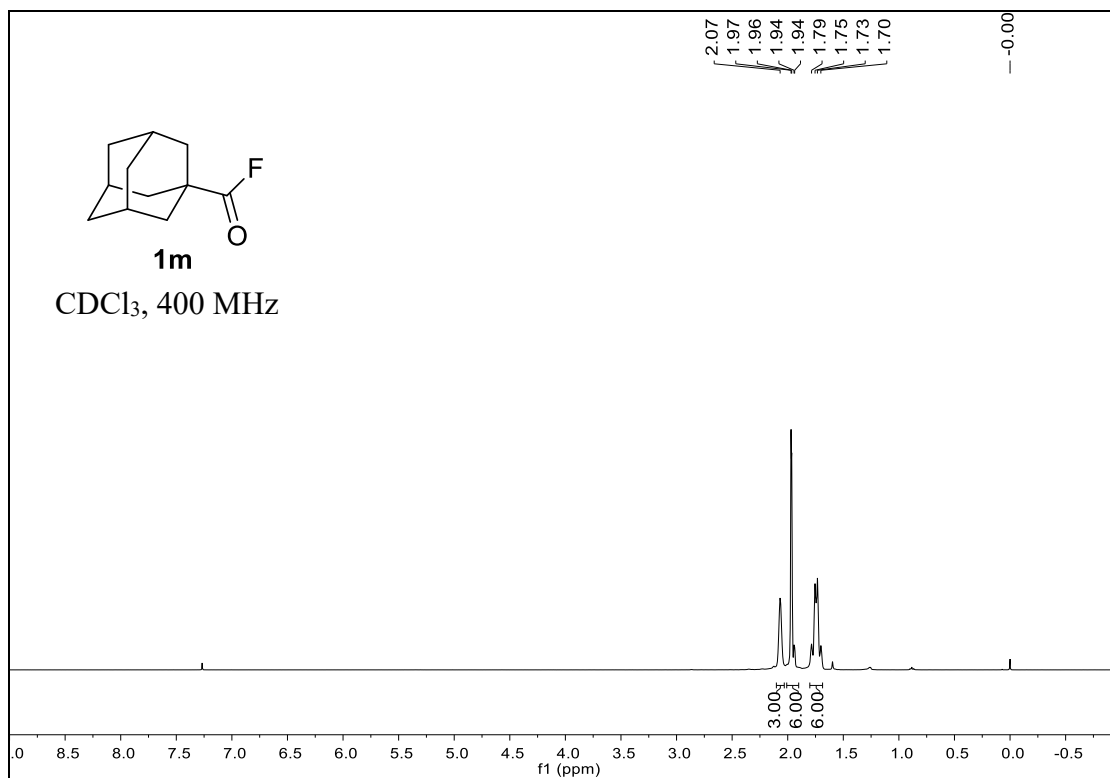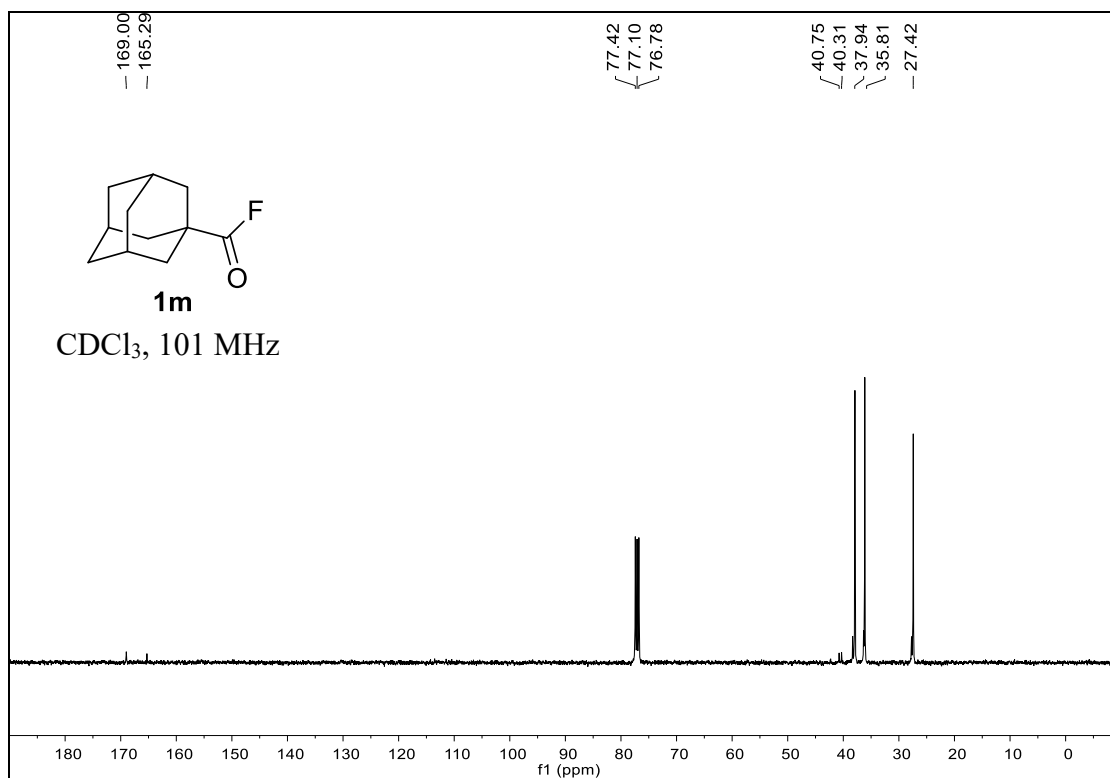

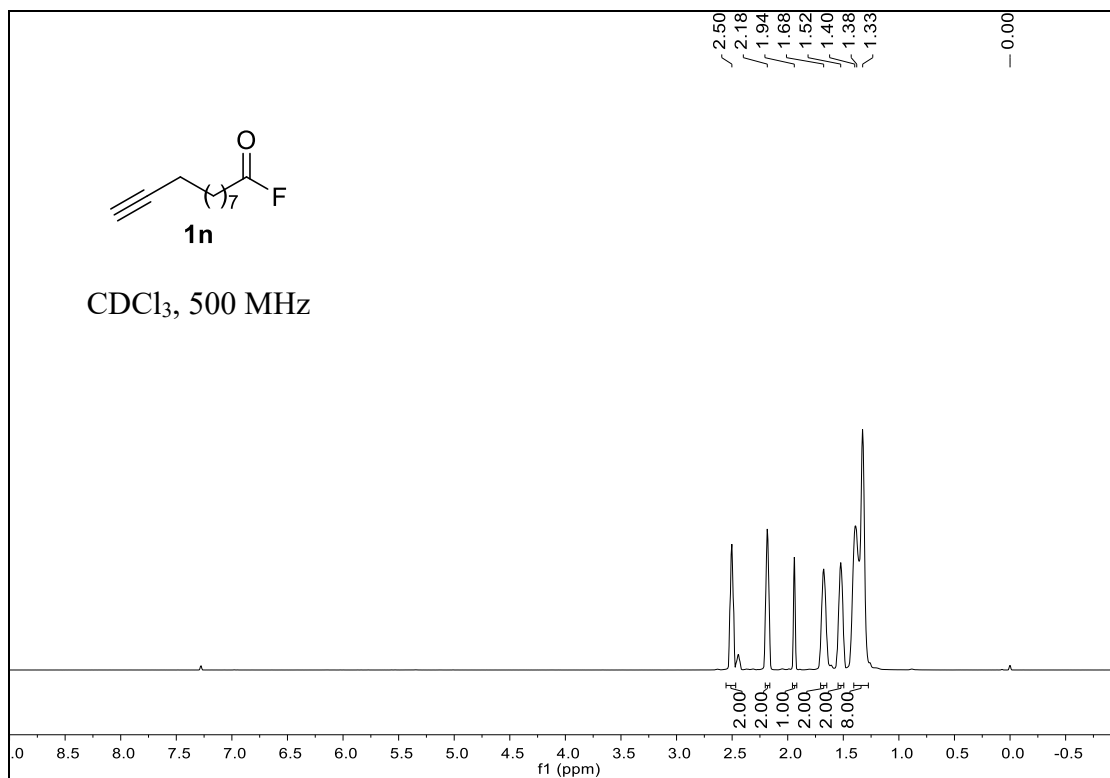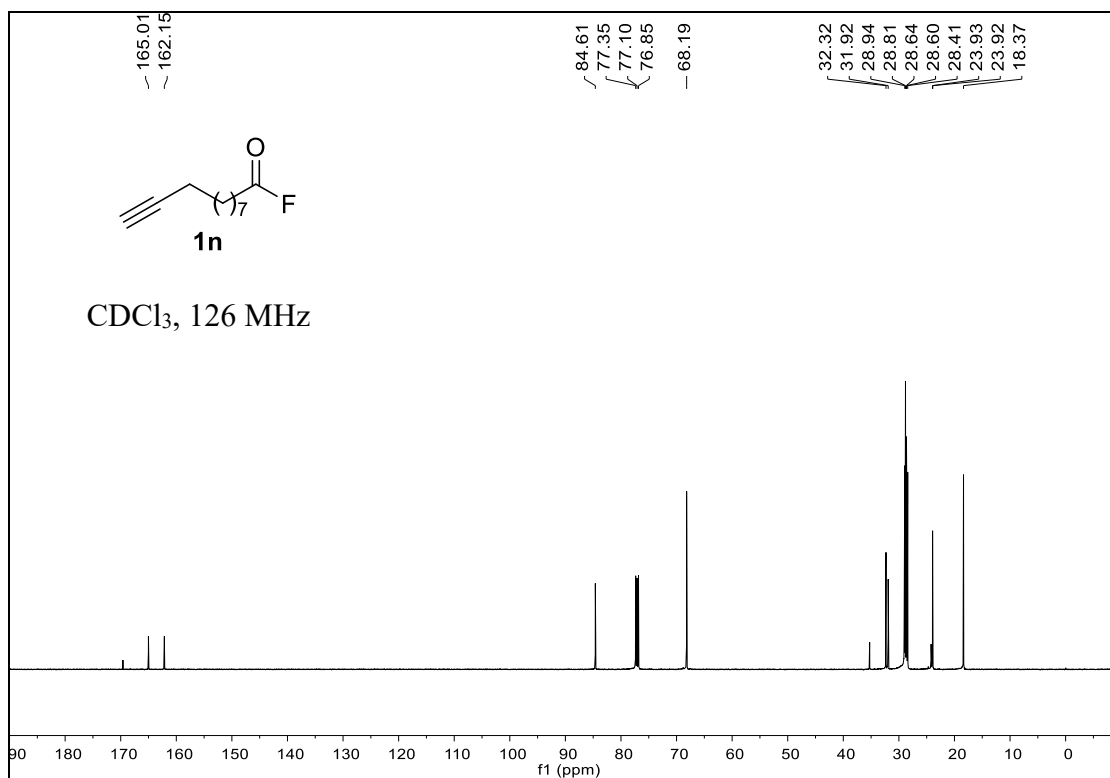

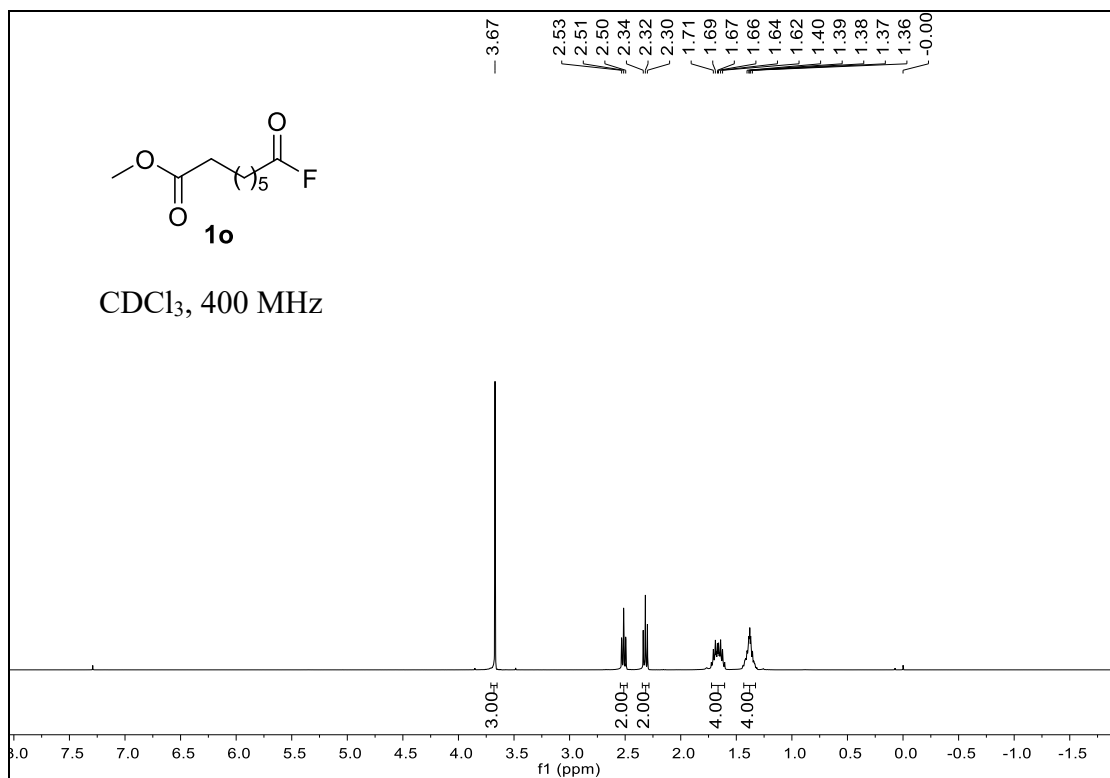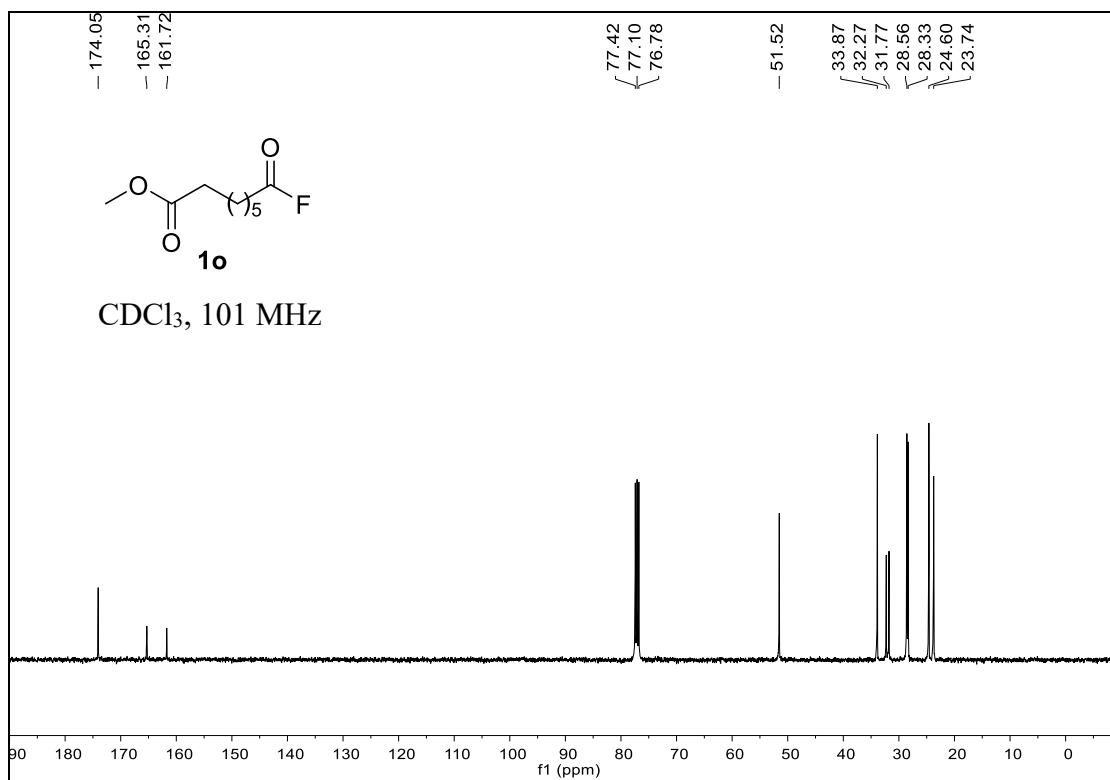



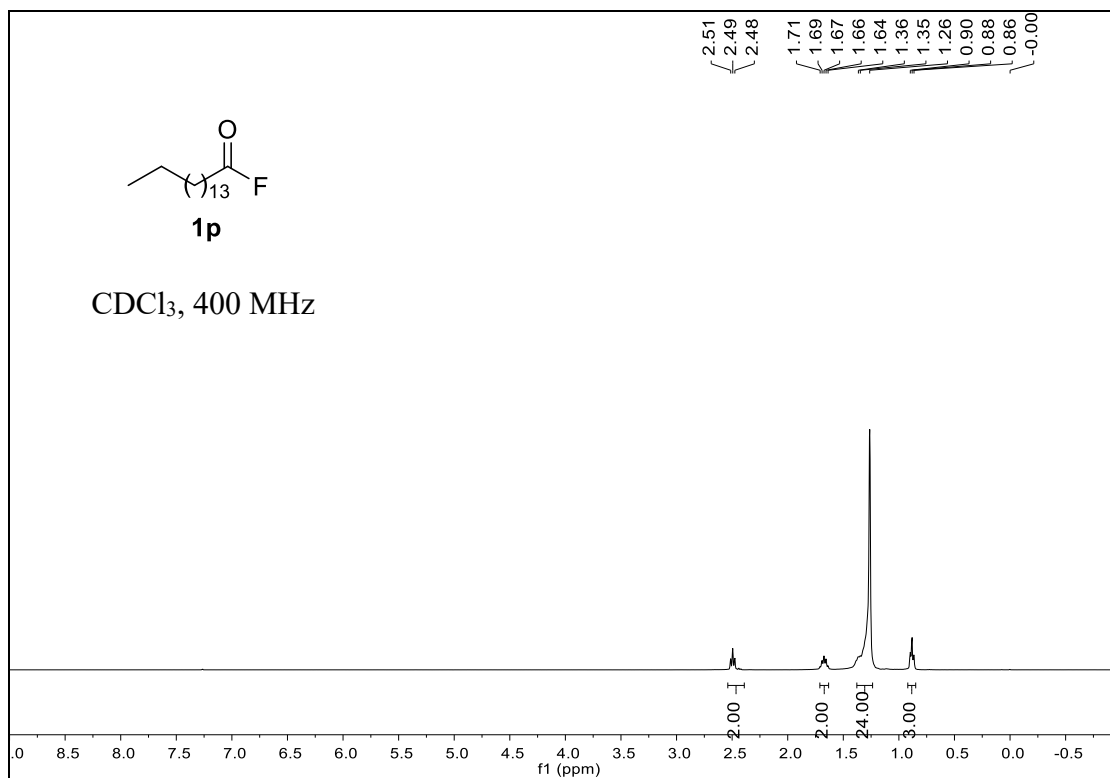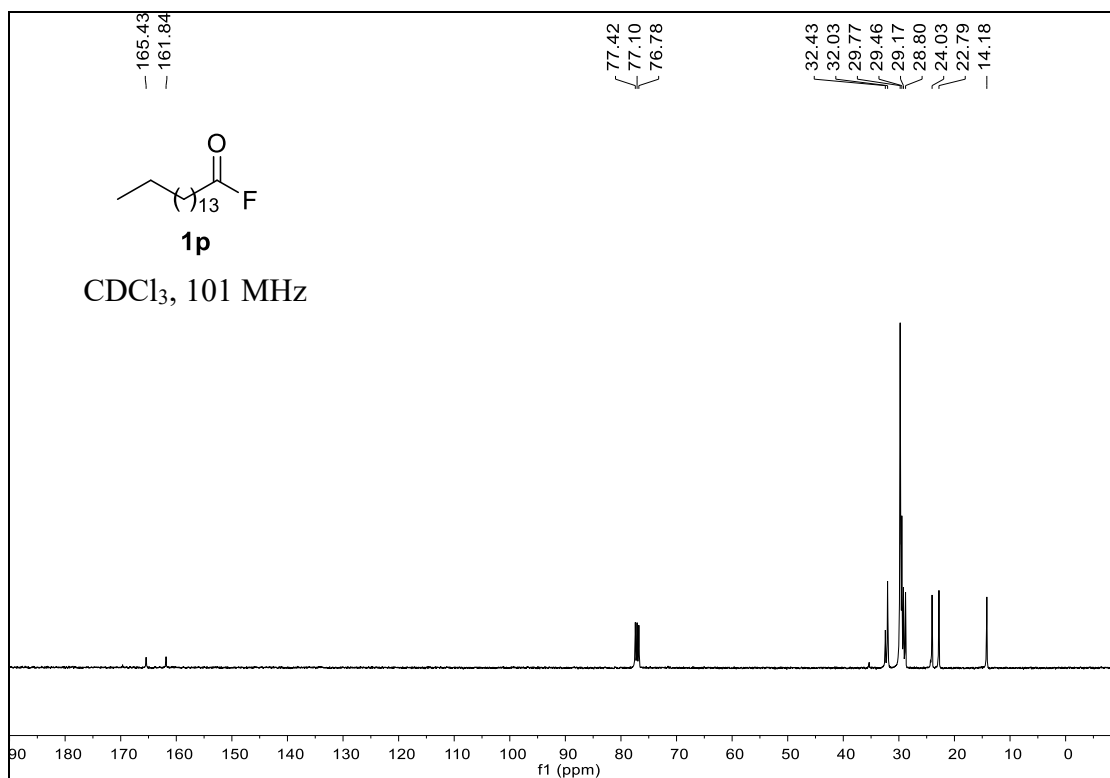

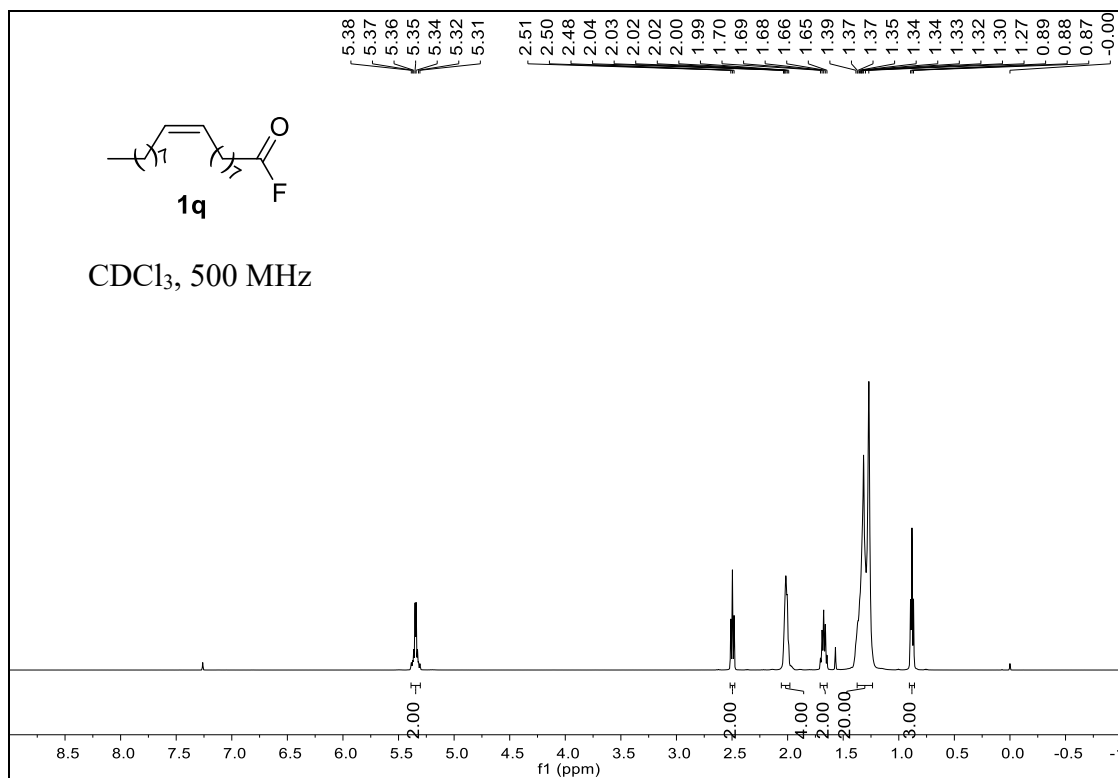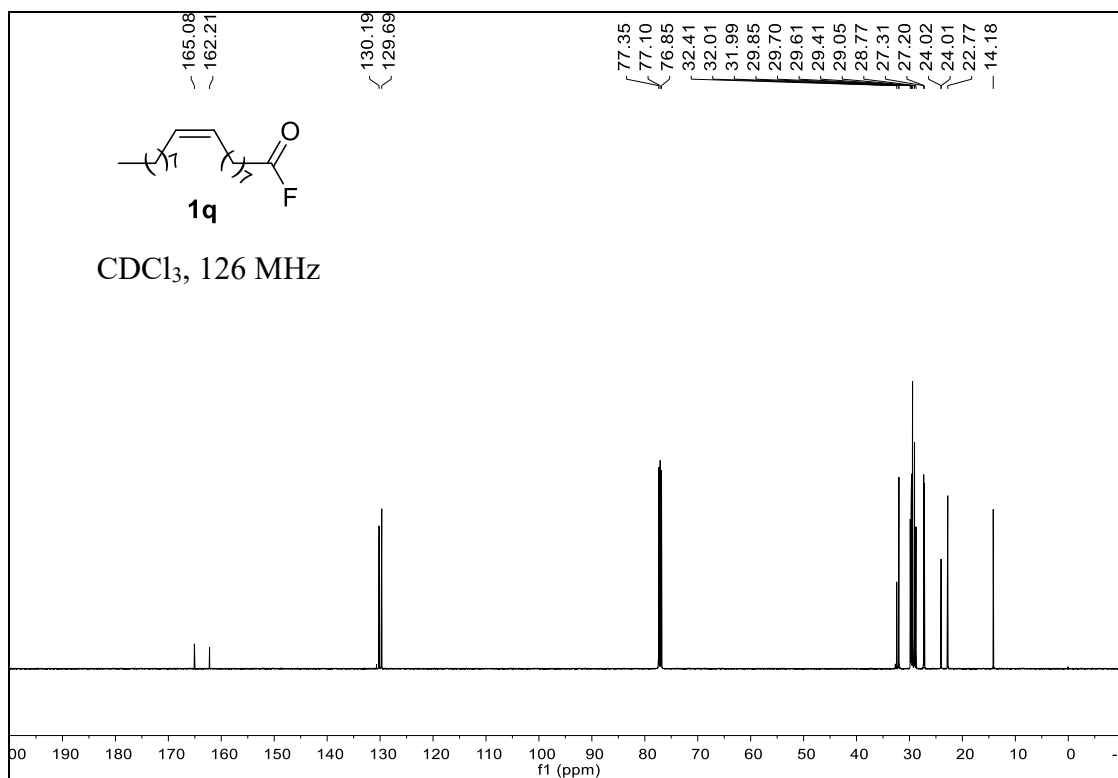

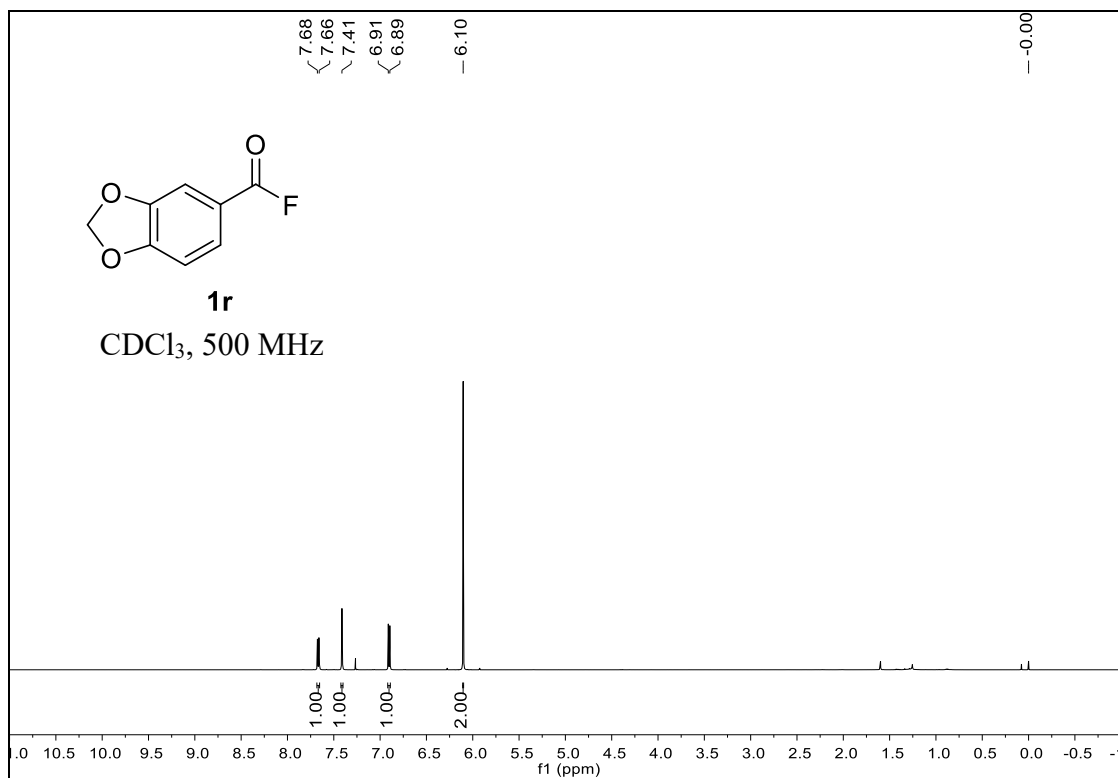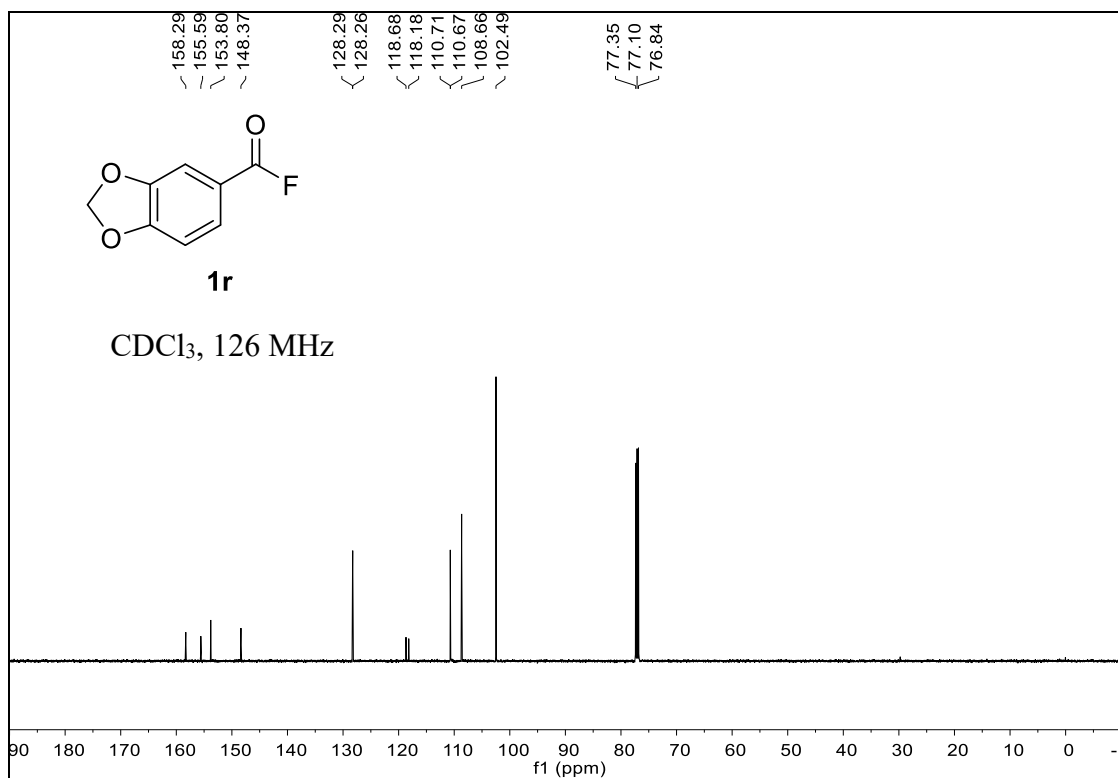

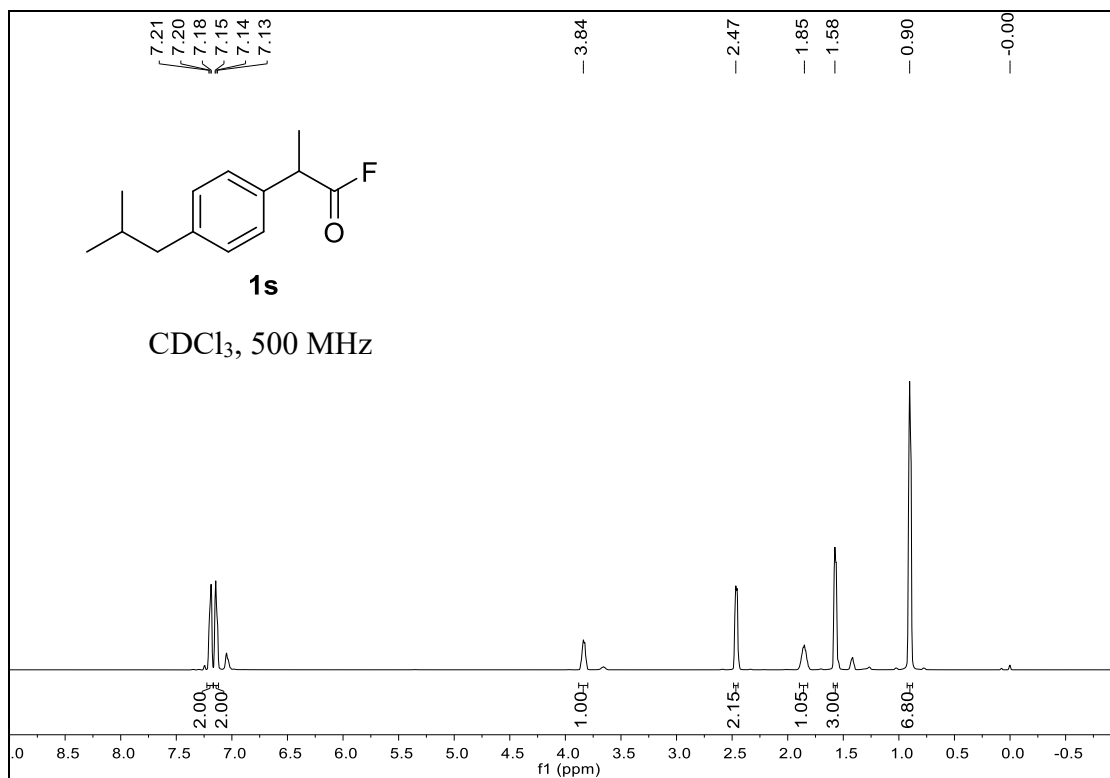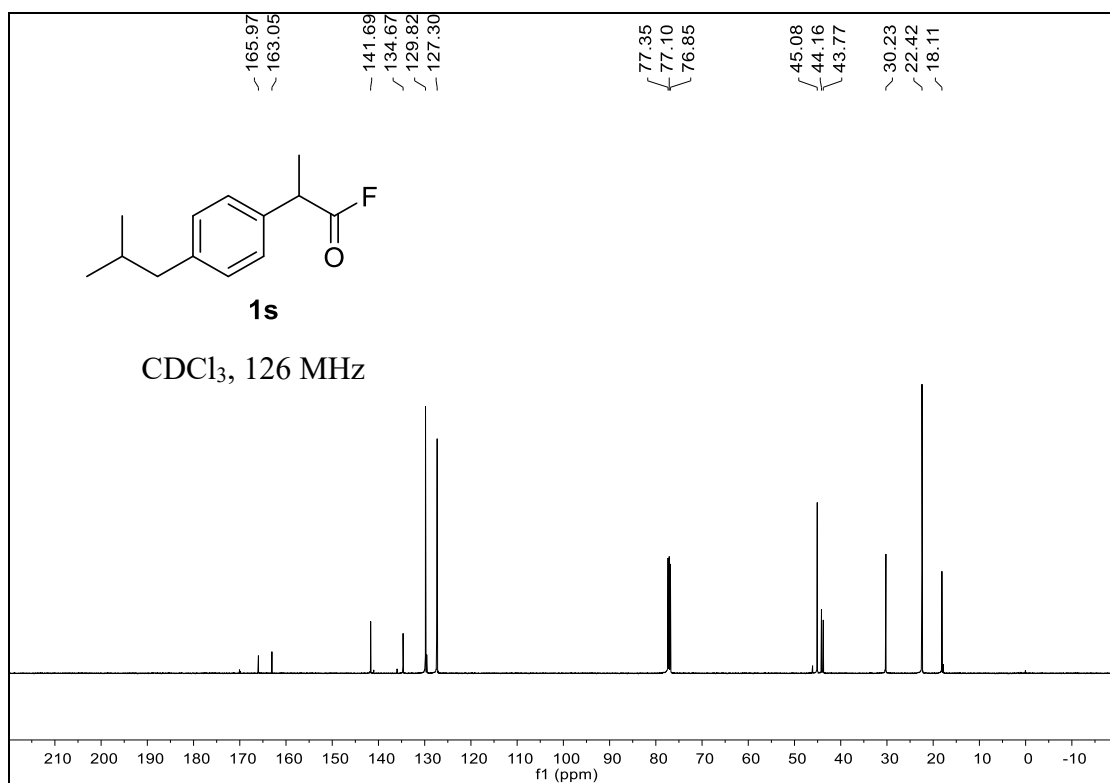

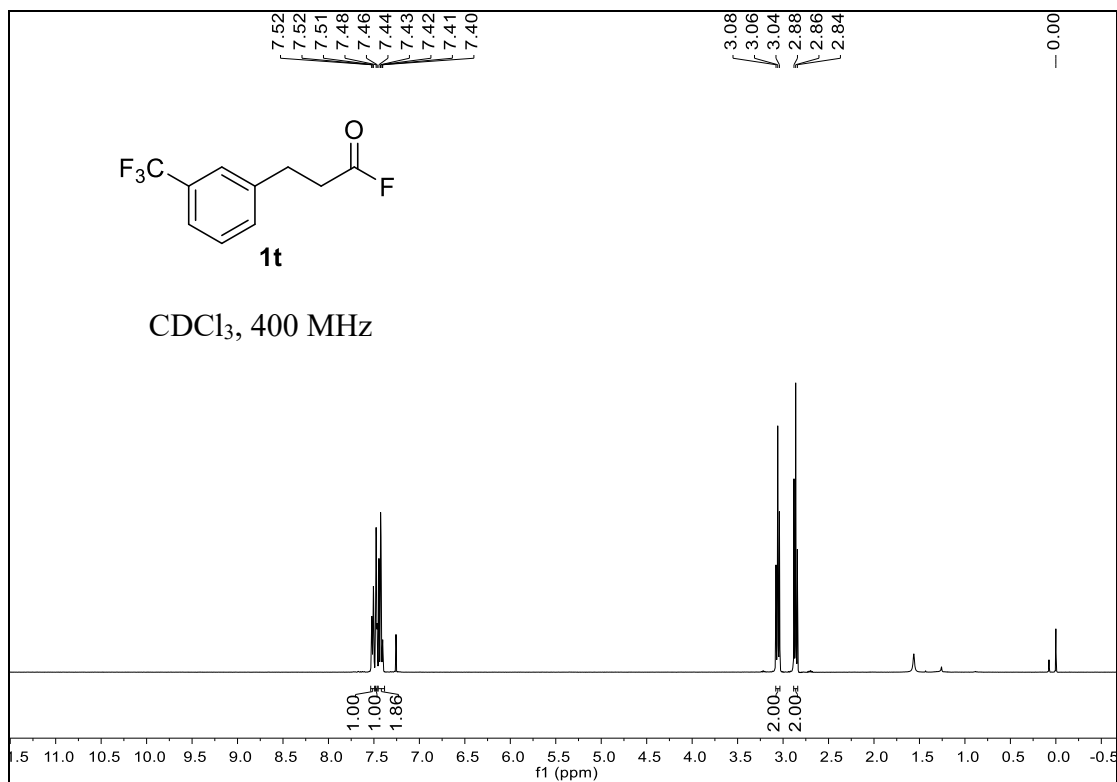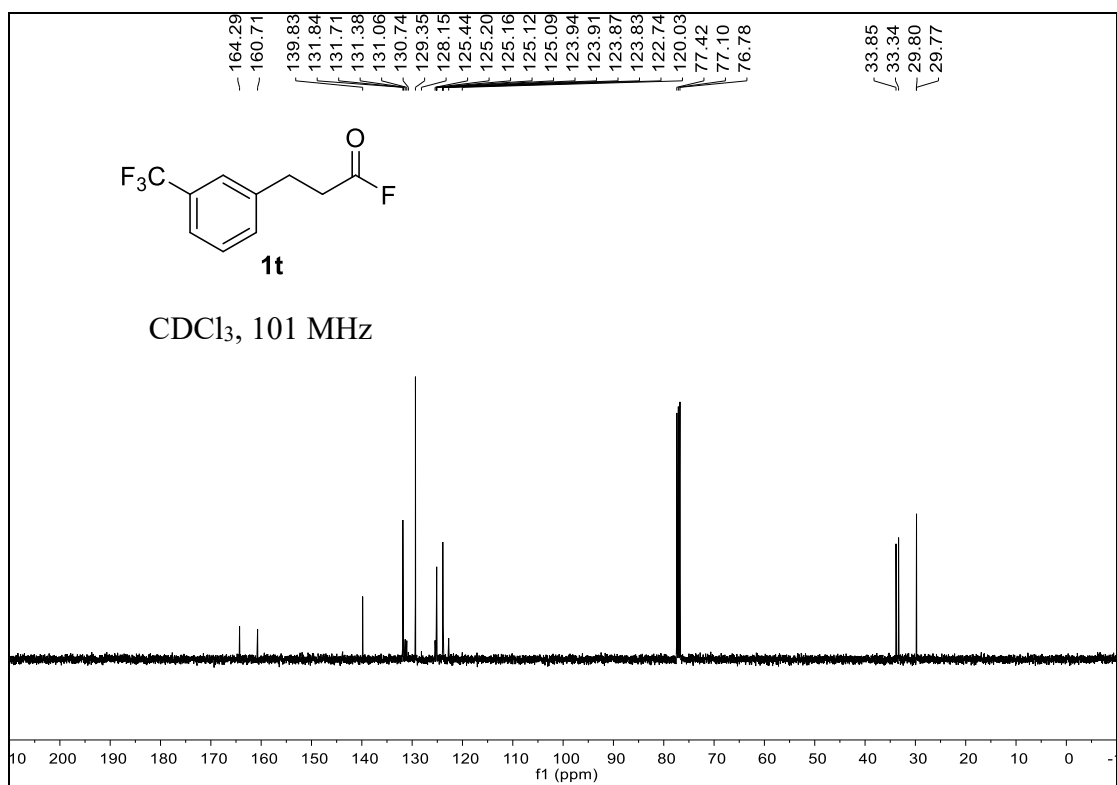

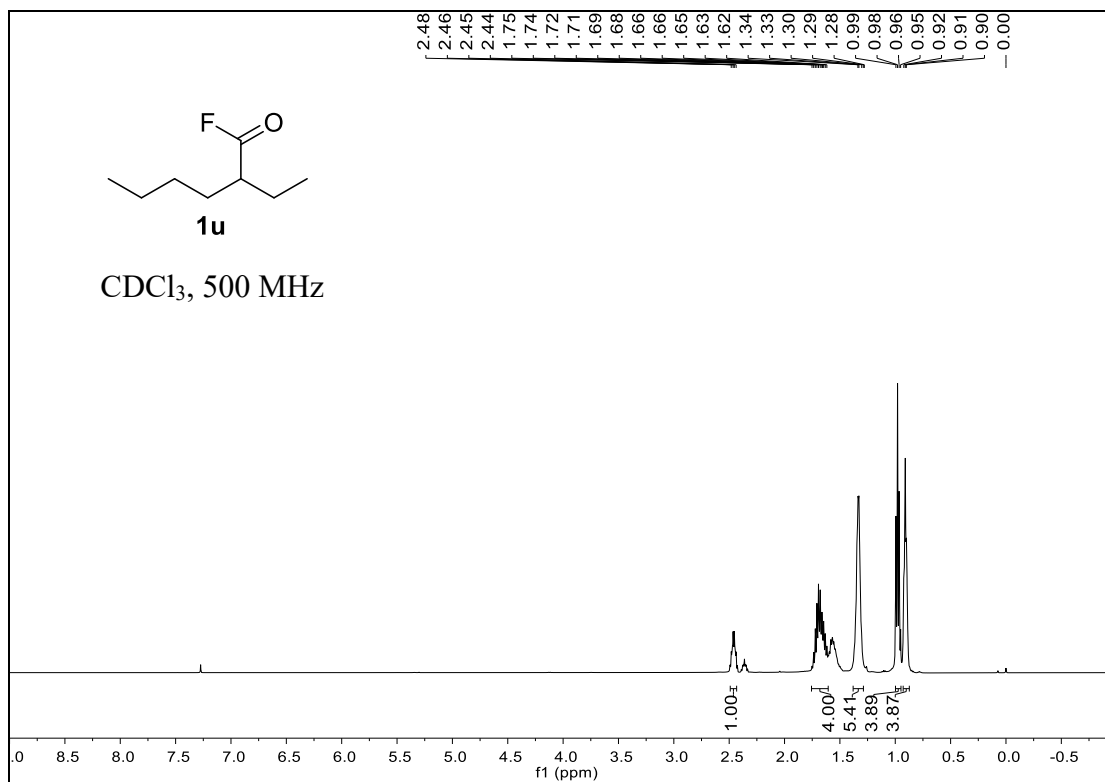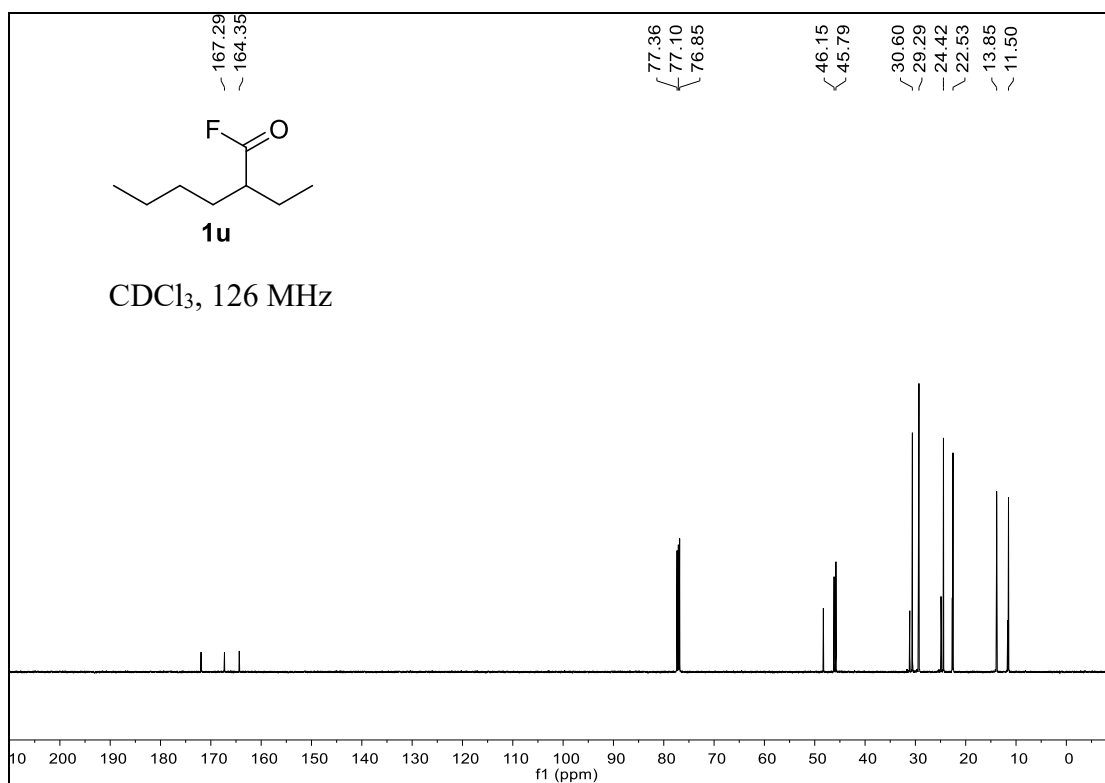

## 9. Cartesian Coordinates with Zero-Point Energies and Thermal Corrections

PhCHO\_CH<sub>3</sub>CN - b3lyp/6-311++g(d,p)

Energy: -345.676370 au

Sum of electronic and thermal Free Energies: -345.597605 au

Geometry:

|   |             |             |             |
|---|-------------|-------------|-------------|
| O | -2.85430600 | -0.39146600 | -0.00000700 |
| C | -1.98670400 | 0.46372700  | 0.00000000  |
| C | -0.53559800 | 0.20083100  | 0.00000100  |
| C | -0.03396000 | -1.10991800 | -0.00000200 |
| H | -0.72801800 | -1.94196800 | -0.00000400 |
| C | 1.33777400  | -1.32572400 | -0.00000100 |
| H | 1.72885000  | -2.33644400 | -0.00000200 |
| C | 2.21723700  | -0.23723300 | 0.00000200  |
| H | 3.28745300  | -0.41011800 | 0.00000300  |
| C | 1.72514800  | 1.06799800  | 0.00000400  |
| H | 2.40970100  | 1.90789400  | 0.00000700  |
| C | 0.34978400  | 1.28670500  | 0.00000300  |
| H | -0.04290400 | 2.29829900  | 0.00000500  |
| H | -2.26272500 | 1.53574900  | -0.00000300 |

PhCHO\_CH<sub>3</sub>CN anion radical - b3lyp/6-311++g(d,p)

Energy: -345.770542 au

Sum of electronic and thermal Free Energies: -345.695655 au

Geometry:

|   |             |             |             |
|---|-------------|-------------|-------------|
| O | -2.90651700 | -0.39907500 | -0.00000500 |
|---|-------------|-------------|-------------|

|   |             |             |             |
|---|-------------|-------------|-------------|
| C | -1.97222800 | 0.47870500  | -0.00000300 |
| C | -0.57200400 | 0.22013600  | -0.00000100 |
| C | -0.03162100 | -1.10952700 | -0.00000100 |
| H | -0.71735100 | -1.94944600 | -0.00000300 |
| C | 1.33761200  | -1.32698500 | 0.00000100  |
| H | 1.71273600  | -2.34717700 | 0.00000100  |
| C | 2.24948400  | -0.25685200 | 0.00000300  |
| H | 3.31831400  | -0.43734300 | 0.00000500  |
| C | 1.73852200  | 1.06016200  | 0.00000400  |
| H | 2.42509800  | 1.90215300  | 0.00000500  |
| C | 0.37653700  | 1.29400500  | 0.00000200  |
| H | 0.00587900  | 2.31624500  | 0.00000200  |
| H | -2.25035700 | 1.55030500  | -0.00000300 |

PhCOF\_CH<sub>3</sub>CN - b3lyp/6-311++g(d,p)

Energy: -444.969983 au

Sum of electronic and thermal Free Energies: -444.900051 au

Geometry:

|   |             |             |             |
|---|-------------|-------------|-------------|
| O | -2.38504500 | -1.11807100 | -0.00000800 |
| C | -1.69792100 | -0.14519800 | 0.00000300  |
| C | -0.23240400 | -0.04650300 | 0.00000300  |
| C | 0.50742500  | -1.23889400 | 0.00000000  |
| H | -0.01258300 | -2.18860900 | -0.00000100 |
| C | 1.89550100  | -1.19005600 | 0.00000000  |
| H | 2.46838800  | -2.10944900 | -0.00000200 |



|   |             |            |             |
|---|-------------|------------|-------------|
| C | 2.54980100  | 0.04415600 | 0.00000300  |
| H | 3.63310900  | 0.07984100 | 0.00000200  |
| C | 1.81619500  | 1.23124100 | 0.00000500  |
| H | 2.32730200  | 2.18635600 | 0.00000700  |
| C | 0.42580000  | 1.19153800 | 0.00000500  |
| H | -0.14630900 | 2.10944100 | 0.00000700  |
| F | -2.30843600 | 1.08769800 | -0.00000700 |

PhCOF\_CH<sub>3</sub>CN anion radical - b3lyp/6-311++g(d,p)

Energy: -445.066652 au

Sum of electronic and thermal Free Energies: -445.001153 au

Geometry:

|   |             |             |             |
|---|-------------|-------------|-------------|
| O | -2.43323600 | -1.13794900 | 0.00000500  |
| C | -1.67208800 | -0.16540300 | -0.00001100 |
| C | -0.26975800 | -0.05569800 | -0.00001400 |
| C | 0.53119100  | -1.25313800 | -0.00001000 |
| H | 0.03153300  | -2.21510300 | -0.00001500 |
| C | 1.91113000  | -1.18696800 | 0.00000000  |
| H | 2.48390000  | -2.11012700 | 0.00000300  |
| C | 2.58712900  | 0.05059800  | 0.00000600  |
| H | 3.66995900  | 0.09203700  | 0.00001400  |
| C | 1.81819300  | 1.23330900  | 0.00000200  |
| H | 2.31957800  | 2.19705300  | 0.00000700  |
| C | 0.43664700  | 1.19729000  | -0.00000800 |
| H | -0.12747500 | 2.12140700  | -0.00001100 |

|   |             |            |            |
|---|-------------|------------|------------|
| F | -2.32958600 | 1.12204300 | 0.00001900 |
|---|-------------|------------|------------|

PhCOCl\_CH<sub>3</sub>CN - b3lyp/6-311++g(d,p)

Energy: -805.313587 au

Sum of electronic and thermal Free Energies: -805.246540 au

Geometry:

|    |             |             |             |
|----|-------------|-------------|-------------|
| O  | 1.72102300  | 1.71269700  | -0.00001300 |
| C  | 1.28536200  | 0.60552300  | -0.00000600 |
| C  | -0.13453600 | 0.20490600  | -0.00000100 |
| C  | -1.07991000 | 1.24635500  | 0.00001000  |
| H  | -0.73937200 | 2.27373800  | 0.00001700  |
| C  | -2.43648500 | 0.95174200  | 0.00001700  |
| H  | -3.16232400 | 1.75595500  | 0.00002900  |
| C  | -2.86196000 | -0.37862600 | 0.00000700  |
| H  | -3.92149500 | -0.60686400 | 0.00001200  |
| C  | -1.92762500 | -1.41436900 | -0.00000800 |
| H  | -2.25847500 | -2.44580300 | -0.00001700 |
| C  | -0.56644000 | -1.12830000 | -0.00001200 |
| H  | 0.15432400  | -1.93374500 | -0.00002500 |
| Cl | 2.49933700  | -0.78048500 | 0.00000200  |

PhCOCl\_CH<sub>3</sub>CN anion radical - b3lyp/6-311++g(d,p)

Energy: -805.419631 au

Sum of electronic and thermal Free Energies: -805.357003 au

Geometry:

|    |             |             |             |
|----|-------------|-------------|-------------|
| O  | 1.74928000  | 1.78454800  | 0.00003800  |
| C  | 1.21965500  | 0.68300500  | -0.00000400 |
| C  | -0.11582800 | 0.23940400  | 0.00000300  |
| C  | -1.13872200 | 1.25600500  | -0.00003800 |
| H  | -0.83786500 | 2.29674000  | -0.00008000 |
| C  | -2.47878800 | 0.91882800  | -0.00002700 |
| H  | -3.22085400 | 1.71186200  | -0.00006400 |
| C  | -2.89490500 | -0.42532300 | 0.00002300  |
| H  | -3.94792800 | -0.68051500 | 0.00004100  |
| C  | -1.90932100 | -1.43000700 | 0.00006400  |
| H  | -2.20857600 | -2.47387700 | 0.00010700  |
| C  | -0.56075200 | -1.12303200 | 0.00005300  |
| H  | 0.17257700  | -1.91756100 | 0.00008300  |
| Cl | 2.54825700  | -0.81919500 | -0.00004900 |

PhCOBr\_CH<sub>3</sub>CN - b3lyp/6-311++g(d,p)

Energy: -2919.233403 au

Sum of electronic and thermal Free Energies: -2919.168282 au

Geometry:

|   |             |            |             |
|---|-------------|------------|-------------|
| O | 0.89829300  | 2.05535600 | -0.00009700 |
| C | 0.61266900  | 0.90376900 | -0.00004500 |
| C | -0.73795800 | 0.31151600 | -0.00003200 |
| C | -1.81410300 | 1.21881800 | -0.00002200 |
| H | -1.61408600 | 2.28244800 | -0.00002000 |
| C | -3.11886000 | 0.74566900 | -0.00001300 |

|    |             |             |             |
|----|-------------|-------------|-------------|
| H  | -3.94533000 | 1.44604900  | -0.00000100 |
| C  | -3.36301000 | -0.62966400 | -0.00001900 |
| H  | -4.38258700 | -0.99723900 | -0.00001300 |
| C  | -2.29895800 | -1.53155500 | -0.00003300 |
| H  | -2.48931700 | -2.59782700 | -0.00004100 |
| C  | -0.98814800 | -1.06663500 | -0.00003800 |
| H  | -0.16528600 | -1.76755900 | -0.00004900 |
| Br | 2.16172800  | -0.41486400 | 0.00006000  |

PhCOBr\_CH<sub>3</sub>CN anion radical - b3lyp/6-311++g(d,p)

Energy: -2919.342267 au

Sum of electronic and thermal Free Energies: -2919.282476 au

Geometry:

|   |             |             |             |
|---|-------------|-------------|-------------|
| O | -0.87945800 | 2.16593300  | 0.00000700  |
| C | -0.47970500 | 1.02316800  | 0.00000300  |
| C | 0.75708500  | 0.36472500  | 0.00000100  |
| C | 1.92569100  | 1.21425800  | 0.00000300  |
| H | 1.78994300  | 2.28902100  | 0.00000600  |
| C | 3.19615900  | 0.67216400  | 0.00000100  |
| H | 4.05188800  | 1.34067300  | 0.00000300  |
| C | 3.39799300  | -0.71998500 | -0.00000200 |
| H | 4.39858500  | -1.13533400 | -0.00000400 |
| C | 2.26892000  | -1.56005500 | -0.00000400 |
| H | 2.40295700  | -2.63745300 | -0.00000700 |
| C | 0.98432300  | -1.04932700 | -0.00000300 |

|    |             |             |             |
|----|-------------|-------------|-------------|
| H  | 0.13415000  | -1.71686500 | -0.00000400 |
| Br | -2.22984700 | -0.43249100 | -0.00000100 |

PhCHO - b3lyp/6-311++g(d,p)/QZVP

Energy: -345.671060 au

Sum of electronic and thermal Free Energies: -345.592259 au

Geometry:

|   |             |             |             |
|---|-------------|-------------|-------------|
| O | -2.84806600 | -0.39234600 | -0.00000500 |
| C | -1.99211300 | 0.46436100  | -0.00000200 |
| C | -0.53420000 | 0.20610600  | 0.00000000  |
| C | -0.03828300 | -1.10482900 | -0.00000200 |
| H | -0.74258400 | -1.92842800 | -0.00000500 |
| C | 1.33253800  | -1.32583800 | 0.00000000  |
| H | 1.71934800  | -2.33853300 | -0.00000200 |
| C | 2.21639400  | -0.24225100 | 0.00000300  |
| H | 3.28624200  | -0.41901600 | 0.00000400  |
| C | 1.72913300  | 1.06388600  | 0.00000500  |
| H | 2.41707700  | 1.90143600  | 0.00000700  |
| C | 0.35448900  | 1.28653600  | 0.00000300  |
| H | -0.03573600 | 2.29977900  | 0.00000400  |
| H | -2.26756500 | 1.53569600  | 0.00000000  |

PhCHO anion radical - b3lyp/6-311++g(d,p)/QZVP

Energy: -345.688050 au

Sum of electronic and thermal Free Energies: -345.614142 au

Geometry:

|   |             |             |             |
|---|-------------|-------------|-------------|
| O | -2.89871100 | -0.39509700 | -0.00001900 |
| C | -1.97822600 | 0.47165200  | 0.00000800  |
| C | -0.57335700 | 0.22353300  | 0.00000600  |
| C | -0.03315800 | -1.10820300 | 0.00000200  |
| H | -0.73290200 | -1.93668900 | 0.00000100  |
| C | 1.33189300  | -1.32715100 | -0.00000100 |
| H | 1.70457500  | -2.35016700 | -0.00000400 |
| C | 2.25321500  | -0.25922900 | 0.00000000  |
| H | 3.32264700  | -0.44238100 | -0.00000200 |
| C | 1.73951400  | 1.05963100  | 0.00000400  |
| H | 2.42684900  | 1.90334700  | 0.00000500  |
| C | 0.37867500  | 1.29348700  | 0.00000700  |
| H | 0.00691500  | 2.31657200  | 0.00001000  |
| H | -2.24974800 | 1.54778000  | -0.00001100 |

PhCOF - b3lyp/6-311++g(d,p)/QZVP

Energy: -444.980900 au

Sum of electronic and thermal Free Energies: -444.910680 au

Geometry:

|   |             |             |             |
|---|-------------|-------------|-------------|
| O | -2.37690200 | -1.12204200 | -0.00000200 |
| C | -1.70717000 | -0.14100700 | -0.00000800 |
| C | -0.23322000 | -0.04234300 | -0.00000300 |
| C | 0.50330500  | -1.23462400 | -0.00000300 |
| H | -0.02594400 | -2.17946700 | -0.00000600 |
| C | 1.89179500  | -1.19059300 | 0.00000000  |

|   |             |             |            |
|---|-------------|-------------|------------|
| H | 2.46173800  | -2.11226700 | 0.00000000 |
| C | 2.55037200  | 0.04031700  | 0.00000400 |
| H | 3.63409700  | 0.07299400  | 0.00000600 |
| C | 1.81977900  | 1.22811300  | 0.00000300 |
| H | 2.33365200  | 2.18219000  | 0.00000600 |
| C | 0.42880000  | 1.19161000  | 0.00000100 |
| H | -0.14390800 | 2.10941700  | 0.00000100 |
| F | -2.30737600 | 1.08829300  | 0.00000400 |

PhCOF anion radical - b3lyp/6-311++g(d,p)/QZVP

Energy: -445.002540 au

Sum of electronic and thermal Free Energies: -444.937281 au

Geometry:

|   |             |             |             |
|---|-------------|-------------|-------------|
| O | -2.42369100 | -1.13702500 | -0.00000500 |
| C | -1.68122600 | -0.16246500 | -0.00000100 |
| C | -0.27271800 | -0.05220300 | 0.00000000  |
| C | 0.52743000  | -1.25028400 | -0.00000100 |
| H | 0.01573800  | -2.20606400 | -0.00000300 |
| C | 1.90519300  | -1.18911500 | 0.00000000  |
| H | 2.47483700  | -2.11615700 | -0.00000100 |
| C | 2.59061800  | 0.04741200  | 0.00000300  |
| H | 3.67459000  | 0.08616600  | 0.00000400  |
| C | 1.81899000  | 1.23194100  | 0.00000400  |
| H | 2.32169500  | 2.19689100  | 0.00000600  |
| C | 0.43898500  | 1.19798400  | 0.00000300  |

|   |             |            |             |
|---|-------------|------------|-------------|
| H | -0.12769700 | 2.12095500 | 0.00000400  |
| F | -2.32591900 | 1.11942100 | -0.00000200 |

PhCOCl - b3lyp/6-311++g(d,p)/QZVP

Energy: -805.324575 au

Sum of electronic and thermal Free Energies: -805.257224 au

Geometry:

|    |             |             |             |
|----|-------------|-------------|-------------|
| O  | 1.71876000  | 1.70808800  | 0.00000600  |
| C  | 1.30090300  | 0.59473100  | 0.00000700  |
| C  | -0.12969100 | 0.19987900  | 0.00000700  |
| C  | -1.06927400 | 1.24375000  | 0.00001700  |
| H  | -0.71710100 | 2.26748700  | 0.00002300  |
| C  | -2.42787900 | 0.95693400  | 0.00001800  |
| H  | -3.14958000 | 1.76539600  | 0.00002500  |
| C  | -2.86117000 | -0.37001400 | 0.00000900  |
| H  | -3.92221300 | -0.59290900 | 0.00001000  |
| C  | -1.93195800 | -1.40905100 | 0.00000000  |
| H  | -2.26803700 | -2.43924200 | -0.00000700 |
| C  | -0.56891300 | -1.12895000 | -0.00000200 |
| H  | 0.15301100  | -1.93373100 | -0.00000900 |
| Cl | 2.48716100  | -0.77972800 | -0.00002500 |

PhCOCl anion radical - b3lyp/6-311++g(d,p)/QZVP

Energy: -805.357571 au

Sum of electronic and thermal Free Energies: -805.294869 au



Geometry:

|    |             |             |             |
|----|-------------|-------------|-------------|
| O  | 1.74656500  | 1.77074800  | -0.00005500 |
| C  | 1.23986100  | 0.66331200  | -0.00002300 |
| C  | -0.10549500 | 0.23246000  | -0.00000900 |
| C  | -1.12316600 | 1.25463300  | -0.00003800 |
| H  | -0.80656700 | 2.29088100  | -0.00006900 |
| C  | -2.46453500 | 0.92926800  | -0.00002600 |
| H  | -3.20056600 | 1.73019100  | -0.00004800 |
| C  | -2.89630200 | -0.41238100 | 0.00001600  |
| H  | -3.95227100 | -0.65991500 | 0.00002500  |
| C  | -1.91246900 | -1.42352200 | 0.00004400  |
| H  | -2.21811800 | -2.46716600 | 0.00007600  |
| C  | -0.56380800 | -1.12604500 | 0.00003300  |
| H  | 0.16929500  | -1.92110300 | 0.00005600  |
| Cl | 2.52889400  | -0.81442500 | 0.00002400  |

PhCOBr - b3lyp/6-311++g(d,p)/QZVP

Energy: -2919.317650 au

Sum of electronic and thermal Free Energies: -2919.252123 au

Geometry:

|   |             |            |             |
|---|-------------|------------|-------------|
| O | 0.89889100  | 2.04937600 | -0.00000400 |
| C | 0.63245300  | 0.89359500 | 0.00000200  |
| C | -0.73023300 | 0.30654500 | 0.00000300  |
| C | -1.80049700 | 1.21744100 | 0.00000100  |
| H | -1.58823300 | 2.27901000 | -0.00000100 |

|    |             |             |             |
|----|-------------|-------------|-------------|
| C  | -3.10869500 | 0.75267500  | 0.00000200  |
| H  | -3.93117900 | 1.45836300  | 0.00000000  |
| C  | -3.36196400 | -0.62011200 | 0.00000400  |
| H  | -4.38402900 | -0.98184200 | 0.00000500  |
| C  | -2.30304800 | -1.52650800 | 0.00000600  |
| H  | -2.49907900 | -2.59220100 | 0.00000800  |
| C  | -0.98927100 | -1.06817400 | 0.00000500  |
| H  | -0.16631600 | -1.76945400 | 0.00000700  |
| Br | 2.15272100  | -0.41490400 | -0.00000400 |

PhCOBr anion radical - b3lyp/6-311++g(d,p)/QZVP

Energy: -2919.355324 au

Sum of electronic and thermal Free Energies: -2919.294529 au

Geometry:

|   |             |             |             |
|---|-------------|-------------|-------------|
| O | -0.88847400 | 2.14191800  | 0.00000600  |
| C | -0.52166200 | 0.98943800  | 0.00000200  |
| C | 0.73449000  | 0.35342600  | 0.00000000  |
| C | 1.89272400  | 1.21629400  | 0.00000300  |
| H | 1.73428500  | 2.28812900  | 0.00000600  |
| C | 3.17062200  | 0.69508300  | 0.00000100  |
| H | 4.01683700  | 1.37828100  | 0.00000300  |
| C | 3.39786100  | -0.69495800 | -0.00000300 |
| H | 4.40537200  | -1.09617800 | -0.00000400 |
| C | 2.27540600  | -1.54941900 | -0.00000500 |
| H | 2.42308700  | -2.62652400 | -0.00000800 |

|    |             |             |             |
|----|-------------|-------------|-------------|
| C  | 0.98578400  | -1.05703300 | -0.00000400 |
| H  | 0.14168800  | -1.73280800 | -0.00000600 |
| Br | -2.20642400 | -0.43037800 | 0.00000000  |

PhCOI - b3lyp/6-311++g(d,p)/QZVP

Energy: -642.881292 au

Sum of electronic and thermal Free Energies: -642.817161 au

Geometry:

|   |             |             |             |
|---|-------------|-------------|-------------|
| O | 0.28163300  | 2.19955800  | 0.00008000  |
| C | 0.10656600  | 1.02565600  | 0.00004000  |
| C | -1.21498300 | 0.34520400  | 0.00003000  |
| C | -2.34594100 | 1.18048200  | 0.00006000  |
| H | -2.20728400 | 2.25414800  | 0.00008900  |
| C | -3.61872900 | 0.62634900  | 0.00005500  |
| H | -4.48798300 | 1.27365500  | 0.00007800  |
| C | -3.77692600 | -0.76078800 | 0.00001900  |
| H | -4.77165500 | -1.19204500 | 0.00001500  |
| C | -2.65808100 | -1.59186800 | -0.00001100 |
| H | -2.77966400 | -2.66858000 | -0.00003900 |
| C | -1.37930600 | -1.04304400 | -0.00000600 |
| H | -0.50978800 | -1.68690300 | -0.00003000 |
| I | 1.92127700  | -0.26922100 | -0.00003500 |

PhCOI anion radical - b3lyp/6-311++g(d,p)/QZVP

Energy: -642.922677 au

Sum of electronic and thermal Free Energies: -642.863575 au

Geometry:

|   |             |             |             |
|---|-------------|-------------|-------------|
| O | 0.24474000  | 2.30420600  | 0.00007100  |
| C | -0.04612200 | 1.13336800  | 0.00004900  |
| C | -1.24380900 | 0.39641900  | 0.00003900  |
| C | -2.46504000 | 1.16943500  | 0.00006700  |
| H | -2.38930500 | 2.25018200  | 0.00009700  |
| C | -3.69875900 | 0.55095900  | 0.00005800  |
| H | -4.59476000 | 1.16716400  | 0.00008100  |
| C | -3.81776600 | -0.85167000 | 0.00002000  |
| H | -4.79134300 | -1.32911100 | 0.00001300  |
| C | -2.63362000 | -1.61752400 | -0.00000900 |
| H | -2.69778700 | -2.70252000 | -0.00003800 |
| C | -1.38583000 | -1.02771000 | 0.00000000  |
| H | -0.49262400 | -1.63786900 | -0.00002300 |
| I | 1.97648300  | -0.27738000 | -0.00003800 |

MeCOF\_CH<sub>3</sub>CN - b3lyp/6-311++g(d,p)

Energy: -253.186381 au

Sum of electronic and thermal Free Energies: -253.164766 au

Geometry:

|   |             |             |             |
|---|-------------|-------------|-------------|
| O | -0.80979300 | -1.10557900 | -0.00000200 |
| C | -0.11096600 | -0.14793200 | -0.00000300 |
| C | 1.37261600  | -0.03235000 | -0.00000100 |
| H | 1.82214000  | -1.02230200 | -0.00000300 |

|   |             |            |             |
|---|-------------|------------|-------------|
| H | 1.69178000  | 0.52877000 | 0.88106100  |
| H | 1.69178200  | 0.52877500 | -0.88105900 |
| F | -0.69969600 | 1.09900900 | 0.00000400  |

MeCOF\_CH<sub>3</sub>CN anion radical - b3lyp/6-311++g(d,p)

Energy: -253.259622 au

Sum of electronic and thermal Free Energies: -253.242401 au

Geometry:

|   |             |             |             |
|---|-------------|-------------|-------------|
| O | 0.44445200  | 1.33146800  | 0.09951400  |
| C | 0.02288100  | 0.24418800  | -0.32580700 |
| C | -1.33055500 | -0.32357000 | 0.04733400  |
| H | -2.10704600 | 0.36557600  | -0.29648200 |
| H | -1.42310500 | -0.42364000 | 1.14133100  |
| H | -1.50216000 | -1.29893500 | -0.40872700 |
| F | 1.03586000  | -0.97982800 | 0.04873400  |

*t*BuCOF\_CH<sub>3</sub>CN - b3lyp/6-311++g(d,p)

Energy: -371.158686 au

Sum of electronic and thermal Free Energies: -371.058462 au

Geometry:

|   |             |             |             |
|---|-------------|-------------|-------------|
| C | -0.93866200 | 0.21699100  | -0.00001000 |
| O | -1.57037600 | 1.22102900  | -0.00000100 |
| C | 0.55985200  | 0.00117600  | 0.00000000  |
| C | 0.94130700  | -0.80061100 | 1.26669400  |
| H | 0.46608000  | -1.78248700 | 1.27738500  |

|   |             |             |             |
|---|-------------|-------------|-------------|
| H | 2.02436700  | -0.94267500 | 1.27901800  |
| H | 0.65882600  | -0.26513400 | 2.17645700  |
| C | 0.94132600  | -0.80060100 | -1.26669400 |
| H | 0.65885900  | -0.26511700 | -2.17645700 |
| H | 2.02438700  | -0.94266500 | -1.27900200 |
| H | 0.46609900  | -1.78247700 | -1.27740000 |
| C | 1.25792600  | 1.36979000  | 0.00001100  |
| H | 2.34001500  | 1.22148500  | 0.00001900  |
| H | 0.99216100  | 1.95177200  | -0.88494700 |
| H | 0.99214700  | 1.95176500  | 0.88496900  |
| F | -1.62560300 | -0.98146300 | -0.00000500 |

*t*BuCOF<sub>2</sub>CH<sub>3</sub>CN anion radical - b3lyp/6-311++g(d,p)

Energy: -371.230145 au

Sum of electronic and thermal Free Energies: -371.134777 au

Geometry:

|   |             |             |             |
|---|-------------|-------------|-------------|
| C | -0.87302200 | 0.33442700  | -0.44687700 |
| O | -1.44955500 | 1.36673500  | -0.07740000 |
| C | 0.56292300  | -0.03470000 | -0.00771200 |
| C | 0.63654700  | -0.15756900 | 1.52874400  |
| H | 0.00251200  | -0.97418500 | 1.88105400  |
| H | 1.66466200  | -0.35652200 | 1.85159100  |
| H | 0.30317800  | 0.76721300  | 2.00820700  |
| C | 1.02150600  | -1.34701500 | -0.66067400 |
| H | 0.94817300  | -1.28517400 | -1.75120800 |

|   |             |             |             |
|---|-------------|-------------|-------------|
| H | 2.06509300  | -1.55802100 | -0.40264500 |
| H | 0.40614400  | -2.18405600 | -0.32727300 |
| C | 1.48034000  | 1.11275300  | -0.47361100 |
| H | 2.52002400  | 0.89822500  | -0.20587800 |
| H | 1.42947000  | 1.23939100  | -1.55985200 |
| H | 1.19422700  | 2.05920900  | -0.00876600 |
| F | -1.76742400 | -0.99859300 | -0.05613900 |

CF<sub>3</sub>COF\_CH<sub>3</sub>CN - b3lyp/6-311++g(d,p)

Energy: -550.977862 au

Sum of electronic and thermal Free Energies: -550.983489 au

Geometry:

|   |             |             |             |
|---|-------------|-------------|-------------|
| C | 0.59049400  | 0.01543300  | -0.00000500 |
| C | -0.95142300 | 0.15940400  | 0.00001400  |
| O | -1.56049100 | 1.16519900  | -0.00002900 |
| F | 1.16293600  | 1.21704800  | -0.00007600 |
| F | 0.99109700  | -0.65756800 | 1.08802700  |
| F | 0.99106000  | -0.65767900 | -1.08798300 |
| F | -1.51737100 | -1.05409100 | 0.00005200  |

CF<sub>3</sub>COF\_CH<sub>3</sub>CN anion radical - b3lyp/6-311++g(d,p)

Energy: -551.091419 au

Sum of electronic and thermal Free Energies: -551.100578 au

Geometry:

|   |             |            |             |
|---|-------------|------------|-------------|
| C | -0.53833800 | 0.00959500 | -0.03561600 |
|---|-------------|------------|-------------|

|   |             |             |             |
|---|-------------|-------------|-------------|
| C | 0.92371900  | 0.20249100  | -0.35478000 |
| O | 1.53297600  | 1.22255500  | 0.02592700  |
| F | -1.26595000 | 1.06464200  | -0.48112200 |
| F | -1.06987900 | -1.10376900 | -0.60031900 |
| F | -0.83331100 | -0.09322100 | 1.31115800  |
| F | 1.54957400  | -1.09575800 | 0.00750100  |
